# Supplementary material
Source: PubMed Central journal article supplement (PMC535665)
Supplement: nar_32_21_6226__1.pdf [file nar_32_21_6226__1.pdf]

| Protein id | Swiss-Prot |                  | Gene name | EcoGene name | GenBank GI number |
|------------|------------|------------------|-----------|--------------|-------------------|
|            | Entry name | Accession Number |           |              |                   |
| b0037      | CAIC_ECOLI | P31552           | caiC      | EG11558      | 1786221           |
| b0051      | KSGA_ECOLI | P06992           | ksgA      | EG10523      | 1786236           |
| b0110      | AMPD_ECOLI | P13016           | ampD      | EG10041      | 1786300           |
| b0126      | YADF_ECOLI | P36857           | yadF      | EG12319      | 1786318           |
| b0179      | LPXD_ECOLI | P21645           | lpxD      | EG10316      | 1786376           |
| b0323      | ARCM_ECOLI | P77624           | yahl      | EG13593      | 1786516           |
| b0363      | YAIP_ECOLI | Q47536           | yaiP      | EG13298      | 1786560           |
| b0394      | YAJF_ECOLI | P23917           | mak       | EG11288      | 1786593           |
| b0419      | YAJO_ECOLI | P77735           | yajO      | EG13611      | 1786621           |
| b0429      | CYOD_ECOLI | P18403           | cyoD      | EG10181      | 1786632           |
| b0430      | CYOC_ECOLI | P18402           | cyoC      | EG10180      | 1786633           |
| b0431      | CYOB_ECOLI | P18401           | cyoB      | EG10179      | 1786634           |
| b0452      | TESB_ECOLI | P23911           | tesB      | EG10995      | 1786657           |
| b0454      | YBAZ_ECOLI | P75707           | ybaZ      | EG13254      | 1786659           |
| b0476      | AES_ECOLI  | P23872           | aes       | EG11101      | 1786682           |
| b0581      | YBDK_ECOLI | P77213           | ybdK      | EG13644      | 1786795           |
| b0630      | LIPB_ECOLI | P30976           | lipB      | EG11591      | 1786848           |
| b0714      | END8_ECOLI | P50465           | nei       | EG13237      | 1786932           |
| b0736      | YBGC_ECOLI | P08999           | ybgC      | EG11110      | 1786957           |
| b0772      | YBHC_ECOLI | P46130           | ybhC      | EG12875      | 1786989           |
| b0825      | FSAА_ECOLI | P78055           | fsaA      | EG13471      | 1787046           |
| b0859      | YBJF_ECOLI | P75817           | ybjF      | EG13427      | 1787083           |
| b0894      | DMSA_ECOLI | P18775           | dmsA      | EG10232      | 1787121           |
| b0909      | YCAL_ECOLI | P43674           | ycaL      | EG13133      | 1787138           |
| b0927      | YCBL_ECOLI | P75849           | ycbL      | EG13704      | 1787158           |
| b0948      | YCBY_ECOLI | P75864           | ycbY      | EG13717      | 1787181           |
| b1055      | YCEA_ECOLI | P24188           | yceA      | EG11116      | 1787294           |
| b1059      | MTOX_ECOLI | P40874           | solA      | EG12669      | 1787298           |
| b1119      | YCFX_ECOLI | P75959           | ycfX      | EG13442      | 1787363           |
| b1145      | YMFК_ECOLI | P75974           | ymfK      | EG14249      | 1787391           |
| b1183      | UMUD_ECOLI | P04153           | umuD      | EG11057      | 1787431           |
| b1200      | YCGT_ECOLI | P76015           | dhaK      | EG13901      | 1787450           |
| b1271      | YCIK_ECOLI | P31808           | yciK      | EG11759      | 1787526           |
| b1298      | YCJL_ECOLI | P76038           | ycjL      | EG13909      | 1787556           |
| b1409      | YNBB_ECOLI | P76091           | ynbB      | EG13749      | 1787677           |
| b1411      | YNBD_ECOLI | P76093           | ynbD      | EG13751      | 1787679           |
| b1498      | YDEN_ECOLI | P77318           | ydeN      | EG13796      | 1787775           |
| b1517      | YNEB_ECOLI | P76143           | lsrF      | EG13810      | 1787796           |
| b1542      | YDFI_ECOLI | P77260           | ydfI      | EG13821      | 1787823           |
| b1598      | YDGD_ECOLI | P76176           | ydgD      | EG13925      | 1787882           |
| b1606      | YDGB_ECOLI | P52109           | ydgB      | EG13189      | 1787891           |
| b1650      | NEMA_ECOLI | P77258           | nemA      | EG13546      | 1787939           |
| b1687      | YDIJ_ECOLI | P77748           | ydiJ      | EG13969      | 1787977           |
| b1710      | BTUE_ECOLI | P06610           | btuE      | EG10129      | 1788003           |
| b1737      | PTCC_ECOLI | P17334           | chbC      | EG10141      | 1788032           |
| b1748      | ARGM_ECOLI | P77581           | argM      | EG13999      | 1788044           |
| b1771      | YDJG_ECOLI | P77256           | ydjG      | EG13483      | 1788070           |
| b1773      | YDJI_ECOLI | P77704           | ydjI      | EG13485      | 1788072           |
| b1774      | YDJJ_ECOLI | P77280           | ydjJ      | EG13486      | 1788073           |
| b1802      | YEAW_ECOLI | P76253           | yeaW      | EG13509      | 1788103           |

|       |            |        |      |         |         |
|-------|------------|--------|------|---------|---------|
| b1812 | PABB_ECOLI | P05041 | pabB | EG10683 | 1788114 |
| b1829 | HTPX_ECOLI | P23894 | htpX | EG10462 | 1788133 |
| b1917 | YECC_ECOLI | P37774 | yecC | EG12347 | 1788225 |
| b2058 | WCAB_ECOLI | P77558 | wcaB | EG13570 | 1788371 |
| b2096 | GATY_ECOLI | P37192 | gatY | EG12419 | 1788412 |
| b2102 | YEGX_ECOLI | P76421 | yegX | EG14067 | 1788419 |
| b2147 | YEIA_ECOLI | P25889 | yeiA | EG11289 | 1788469 |
| b2255 | YFBG_ECOLI | P77398 | arnA | EG14091 | 1788589 |
| b2267 | ELAA_ECOLI | P52077 | elaA | EG13184 | 1788602 |
| b2299 | YFCD_ECOLI | P76494 | yfcD | EG14107 | 1788637 |
| b2371 | YFDE_ECOLI | P76518 | yfdE | EG13284 | 1788714 |
| b2374 | YFDW_ECOLI | P77407 | yfdW | EG14145 | 1788717 |
| b2407 | XAPA_ECOLI | P45563 | xapA | EG20250 | 1788746 |
| b2426 | UCPA_ECOLI | P37440 | ucpA | EG12133 | 1788766 |
| b2458 | EUTD_ECOLI | P77218 | eutD | EG14188 | 1788800 |
| b2468 | AEGA_ECOLI | P37127 | aegA | EG12409 | 1788811 |
| b2482 | HYFB_ECOLI | P23482 | hyfB | EG11282 | 1788827 |
| b2484 | HYFD_ECOLI | P77416 | hyfD | EG14212 | 1788829 |
| b2486 | HYFF_ECOLI | P77437 | hyfF | EG14214 | 1788831 |
| b2494 | YFGC_ECOLI | P76568 | yfgC | EG14199 | 1788840 |
| b2495 | YFGD_ECOLI | P76569 | yfgD | EG14200 | 1788841 |
| b2532 | YFHQ_ECOLI | P77438 | yfhQ | EG13452 | 1788881 |
| b2638 | YFJU_ECOLI | P52136 | yfjU | EG13207 | 1788991 |
| b2690 | YQAB_ECOLI | P77475 | yqaB | EG13530 | 1789046 |
| b2736 | YGBJ_ECOLI | Q46888 | ygbJ | EG13104 | 1789092 |
| b2738 | YGBL_ECOLI | Q46890 | ygbL | EG13106 | 1789094 |
| b2776 | YGCE_ECOLI | P55138 | ygcE | EG13033 | 1789138 |
| b2785 | RUMA_ECOLI | P55135 | rumA | EG11247 | 1789148 |
| b2788 | GUDX_ECOLI | Q46915 | gudX | EG13168 | 1789151 |
| b2794 | YQCD_ECOLI | Q46920 | yqcD | EG13173 | 1789158 |
| b2836 | AAS_ECOLI  | P31119 | aas  | EG11679 | 1789201 |
| b2872 | YGEY_ECOLI | Q46805 | ygeY | EG13055 | 1789236 |
| b2873 | YGEZ_ECOLI | Q46806 | hyuA | EG13056 | 1789237 |
| b2874 | ARCL_ECOLI | Q46807 | yqeA | EG13057 | 1789238 |
| b2887 | YGFT_ECOLI | Q46820 | ygfT | EG13070 | 1789253 |
| b2912 | YGFA_ECOLI | P09160 | ygfA | EG11158 | 1789278 |
| b2917 | SBM_ECOLI  | P27253 | yliK | EG11444 | 1789284 |
| b2920 | YGFH_ECOLI | P52043 | ygfH | EG12973 | 1789287 |
| b2930 | YGGF_ECOLI | P21437 | yggF | EG11245 | 1789298 |
| b2936 | YGGG_ECOLI | P25894 | yggG | EG11291 | 1789305 |
| b2979 | GLCD_ECOLI | P52075 | glcD | EG12997 | 1789351 |
| b2999 | Q46849     | None   | yghX | EG13008 | 1789373 |
| b3015 | YGIQ_ECOLI |        | ygiQ | EG13019 | 1789391 |
| b3019 | PARC_ECOLI | P20082 | parC | EG10686 | 1789396 |
| b3030 | PARE_ECOLI | P20083 | parE | EG10687 | 1789408 |
| b3054 | YGIF_ECOLI | P30871 | ygiF | EG11603 | 1789434 |
| b3114 | TDCE_ECOLI | P42632 | tdcE | EG12758 | 1789502 |
| b3115 | TDCD_ECOLI | P11868 | tdcD | EG11172 | 1789503 |
| b3137 | AGAY_ECOLI | P42908 | kbaY | EG12768 | 1789526 |
| b3141 | AGAI_ECOLI | P42912 | agal | EG12772 | 1789530 |
| b3360 | PABA_ECOLI | P00903 | pabA | EG10682 | 1789760 |
| b3374 | YHFQ_ECOLI | P45543 | frlD | EG12912 | 1789775 |

|       |            |        |      |         |         |
|-------|------------|--------|------|---------|---------|
| b3379 | PHP_ECOLI  | P45548 | php  | EG12917 | 1789780 |
| b3551 | BISC_ECOLI | P20099 | bisC | EG10124 | 1789973 |
| b3581 | SGBH_ECOLI | P37678 | sgbH | EG12285 | 1790006 |
| b3583 | SGBE_ECOLI | P37680 | sgbE | EG12287 | 1790008 |
| b3611 | YIBN_ECOLI | P37688 | yibN | EG12295 | 1790040 |
| b3647 | YICF_ECOLI | P25772 | ligB | EG11334 | 1790079 |
| b3678 | YIDJ_ECOLI | P31447 | yidJ | EG11705 | 1790112 |
| b3683 | PTIC_ECOLI | P31452 | glvC | EG11710 | 1790117 |
| b3718 | YIEK_ECOLI | P31470 | yieK | EG11728 | 1790155 |
| b3784 | WECA_ECOLI | P24235 | rfe  | EG10840 | 1790218 |
| b3787 | WECC_ECOLI | P27829 | rffD | EG11452 | 2367284 |
| b3794 | WECG_ECOLI | P27836 | rffM | EG11458 | 2367289 |
| b3812 | YIGB_ECOLI | P23306 | yigB | EG11202 | 2367295 |
| b3833 | UBIE_ECOLI | P27851 | ubiE | EG11473 | 2367307 |
| b3862 | YIHG_ECOLI | P32129 | yihG | EG11833 | 1790293 |
| b3879 | YIHR_ECOLI | P32139 | yihR | EG11844 | 1790311 |
| b3881 | YIHT_ECOLI | P32141 | yihT | EG11846 | 1790314 |
| b3882 | YIHU_ECOLI | P32142 | yihU | EG11847 | 1790315 |
| b3883 | YIHV_ECOLI | P32143 | yihV | EG11848 | 1790316 |
| b3932 | HSLV_ECOLI | P31059 | hslV | EG11676 | 1790367 |
| b3946 | FSAB_ECOLI | P32669 | fsaB | EG11905 | 1790382 |
| b3949 | PTWC_ECOLI | P32672 | frwC | EG11908 | 1790386 |
| b4085 | ALSE_ECOLI | P32719 | alsE | EG11957 | 1790523 |
| b4196 | SGAH_ECOLI | P39304 | ulaD | EG12496 | 1790640 |
| b4198 | SGAE_ECOLI | P39306 | ulaF | EG12498 | 1790642 |
| b4233 | MPL_ECOLI  | P37773 | mpl  | EG12440 | 1790680 |
| b4301 | SGCE_ECOLI | P39362 | sgcE | EG12553 | 1790754 |
| b4374 | YJJG_ECOLI | P33999 | yjjG | EG12115 | 1790833 |
| b4379 | YJJW_ECOLI | P39409 | yjjW | EG12599 | 1790839 |
| b4386 | LPLA_ECOLI | P32099 | lplA | EG11796 | 1790846 |

**EFICAz predicted 4 digit EC number**

6.2.1.3  
2.1.1.48  
3.5.1.28  
4.2.1.1  
2.3.1.129  
2.7.2.2  
2.4.1.12  
2.7.1.2  
1.1.1.274  
1.9.3.1  
1.9.3.1  
1.9.3.1  
3.1.2.2  
2.1.1.63  
3.1.1.3  
6.3.2.2  
6.3.4.15  
3.2.2.23  
3.1.2.23  
3.1.1.11  
2.2.1.2  
2.1.1.35  
1.7.2.3  
3.4.24.84  
3.1.2.6  
2.1.1.72  
2.8.1.1  
1.5.3.1  
2.7.1.2  
3.4.21.88  
3.4.21.88  
2.7.1.29  
1.1.1.125;1.3.1.9  
3.4.19.9  
2.7.7.41  
3.1.3.48  
3.1.6.1  
4.1.2.13  
1.1.1.11  
3.4.21.19  
1.3.1.9  
1.6.99.1  
1.1.2.4  
1.11.1.9  
2.7.1.69  
2.6.1.11  
1.1.1.274  
4.1.2.13  
1.1.1.14  
1.14.15.7

4.1.3.27  
3.4.24.84  
3.6.3.25  
2.3.1.30  
4.1.2.13  
3.2.1.17  
1.3.3.1  
2.1.2.9  
6.2.1.22  
5.3.3.2  
5.1.99.4  
5.1.99.4  
2.4.2.1  
1.3.1.56  
2.3.1.8  
1.4.1.13  
1.6.5.3  
1.6.5.3  
1.6.5.3  
3.4.24.84  
1.20.4.1  
2.1.1.34  
1.20.4.1  
5.4.2.6  
1.1.1.31  
4.1.2.17  
2.7.1.53  
2.1.1.35  
4.2.1.40  
3.5.4.16  
1.2.1.31  
3.4.13.3  
3.5.2.2  
2.7.2.2  
1.4.1.13  
6.3.3.2  
5.4.99.2  
3.1.2.1  
3.1.3.11  
3.4.24.84  
1.1.2.4  
3.1.1.45  
1.97.1.4  
5.99.1.3  
5.99.1.3  
3.6.1.28  
2.3.1.54  
2.7.2.1  
4.1.2.13  
3.5.99.6  
4.1.3.27  
2.7.1.4

3.1.8.1  
1.7.2.3  
4.1.1.23  
4.1.2.17;5.1.3.4  
2.8.1.1  
6.5.1.2  
3.1.6.1  
2.7.1.69  
3.5.99.6  
2.7.8.13  
1.1.1.22  
2.4.1.187  
3.1.3.18  
2.1.1.64  
2.3.1.51  
5.1.3.3  
4.1.2.40  
1.1.1.31  
2.7.1.15  
3.4.25.1  
2.2.1.2  
2.7.1.69  
5.1.3.1  
4.1.1.23  
5.1.3.4  
6.3.2.8  
5.1.3.1  
3.1.3.18  
1.97.1.4  
6.3.4.15

| Enzyme function description                                                       | Component |         |
|-----------------------------------------------------------------------------------|-----------|---------|
|                                                                                   | SIT       | PROSITE |
| Long-chain-fatty-acid--CoA ligase                                                 |           |         |
| rRNA (adenine-N(6)-)-methyltransferase                                            | SIT       | PROSITE |
| N-acetylmuramoyl-L-alanine amidase                                                |           |         |
| Carbonate dehydratase                                                             | SIT       | PROSITE |
| Acyl-[acyl-carrier-protein]--UDP-N-acetylglucosamine O-acyltransferase            |           |         |
| Carbamate kinase                                                                  | SIT       |         |
| Cellulose synthase (UDP-forming)                                                  |           |         |
| Glucokinase                                                                       |           |         |
| 2,5-didehydrogluconate reductase                                                  |           |         |
| Cytochrome-c oxidase                                                              |           |         |
| Cytochrome-c oxidase                                                              | SIT       |         |
| Cytochrome-c oxidase                                                              | SIT       |         |
| Palmitoyl-CoA hydrolase                                                           | SIT       |         |
| Methylated-DNA--[protein]-cysteine S-methyltransferase                            |           |         |
| Triacylglycerol lipase                                                            | SIT       | PROSITE |
| Glutamate--cysteine ligase                                                        |           |         |
| Biotin--[acetyl-CoA-carboxylase] ligase                                           |           |         |
| DNA-formamidopyrimidine glycosylase                                               | SIT       | PROSITE |
| 4-hydroxybenzoyl-CoA thioesterase                                                 | SIT       | PROSITE |
| Pectinesterase                                                                    | SIT       | PROSITE |
| Transaldolase                                                                     | SIT       |         |
| tRNA (uracil-5-)-methyltransferase                                                | SIT       | PROSITE |
| Trimethylamine-N-oxide reductase (cytochrome c)                                   | SIT       |         |
| Ste24 endopeptidase                                                               |           |         |
| Hydroxyacylglutathione hydrolase                                                  |           |         |
| Site-specific DNA-methyltransferase (adenine-specific)                            |           |         |
| Thiosulfate sulfurtransferase                                                     |           |         |
| Sarcosine oxidase                                                                 | SIT       |         |
| Glucokinase                                                                       |           |         |
| Repressor lexA                                                                    |           |         |
| Repressor lexA                                                                    |           |         |
| Glycerone kinase                                                                  |           |         |
| 2-deoxy-D-gluconate 3-dehydrogenase;Enoyl-[acyl-carrier protein] reductase (NADH) |           |         |
| Gamma-glutamyl hydrolase                                                          |           |         |
| Phosphatidate cytidyltransferase                                                  | SIT       | PROSITE |
| Protein-tyrosine-phosphatase                                                      |           |         |
| Arylsulfatase                                                                     |           |         |
| Fructose-bisphosphate aldolase                                                    |           |         |
| D-arabinitol 4-dehydrogenase                                                      |           |         |
| Glutamyl endopeptidase                                                            |           |         |
| Enoyl-[acyl-carrier protein] reductase (NADH)                                     |           |         |
| NADPH dehydrogenase                                                               | SIT       |         |
| D-lactate dehydrogenase (cytochrome)                                              |           |         |
| Glutathione peroxidase                                                            |           |         |
| Protein-N(pi)-phosphohistidine-sugar phosphotransferase                           | SIT       |         |
| Acetyloronithine transaminase                                                     | SIT       |         |
| 2,5-didehydrogluconate reductase                                                  |           |         |
| Fructose-bisphosphate aldolase                                                    | SIT       |         |
| L-iditol 2-dehydrogenase                                                          |           |         |
| Choline monooxygenase                                                             |           |         |

|                                                |             |
|------------------------------------------------|-------------|
| Anthranilate synthase                          | SIT         |
| Ste24 endopeptidase                            |             |
| Sulfate-transporting ATPase                    |             |
| Serine O-acetyltransferase                     | SIT         |
| Fructose-bisphosphate aldolase                 | SIT PROSITE |
| Lysozyme                                       |             |
| Dihydroorotate oxidase                         | SIT         |
| Methionyl-tRNA formyltransferase               |             |
| [Citrate (pro-3S)-lyase] ligase                |             |
| Isopentenyl-diphosphate delta-isomerase        |             |
| Alpha-methylacyl-CoA racemase                  |             |
| Alpha-methylacyl-CoA racemase                  |             |
| Purine-nucleoside phosphorylase                | SIT         |
| Cis-2,3-dihydrobiphenyl-2,3-diol dehydrogenase |             |
| Phosphate acetyltransferase                    |             |
| Glutamate synthase (NADPH)                     |             |
| NADH dehydrogenase (ubiquinone)                |             |
| NADH dehydrogenase (ubiquinone)                |             |
| NADH dehydrogenase (ubiquinone)                |             |
| Ste24 endopeptidase                            |             |
| Arsenate reductase (glutaredoxin)              | SIT         |
| tRNA (guanosine-2'-O-)-methyltransferase       |             |
| Arsenate reductase (glutaredoxin)              |             |
| Beta-phosphoglucomutase                        |             |
| 3-hydroxyisobutyrate dehydrogenase             |             |
| L-fuculose-phosphate aldolase                  |             |
| L-xylulokinase                                 |             |
| tRNA (uracil-5-)-methyltransferase             | SIT PROSITE |
| Glucarate dehydratase                          | SIT         |
| GTP cyclohydrolase I                           |             |
| Amino adipate-semialdehyde dehydrogenase       |             |
| Xaa-His dipeptidase                            |             |
| Dihydropyrimidinase                            | SIT         |
| Carbamate kinase                               | SIT         |
| Glutamate synthase (NADPH)                     |             |
| 5-formyltetrahydrofolate cyclo-ligase          |             |
| Methylmalonyl-CoA mutase                       | SIT PROSITE |
| Acetyl-CoA hydrolase                           |             |
| Fructose-bisphosphatase                        |             |
| Ste24 endopeptidase                            |             |
| D-lactate dehydrogenase (cytochrome)           |             |
| Carboxymethylenebutenolidase                   |             |
| Formate acetyltransferase activating enzyme    |             |
| DNA topoisomerase (ATP-hydrolyzing)            | SIT         |
| DNA topoisomerase (ATP-hydrolyzing)            | SIT         |
| Thiamine-triphosphatase                        |             |
| Formate C-acetyltransferase                    | SIT         |
| Acetate kinase                                 | SIT         |
| Fructose-bisphosphate aldolase                 | SIT PROSITE |
| Glucosamine-6-phosphate deaminase              | SIT PROSITE |
| Anthranilate synthase                          | SIT         |
| Fructokinase                                   |             |



|                                                              |             |
|--------------------------------------------------------------|-------------|
| Aryldialkylphosphatase                                       | SIT PROSITE |
| Trimethylamine-N-oxide reductase (cytochrome c)              | SIT         |
| Orotidine-5'-phosphate decarboxylase                         |             |
| L-fucose-phosphate aldolase;L-ribulose-phosphate 4-epimerase | SIT         |
| Thiosulfate sulfurtransferase                                |             |
| DNA ligase (NAD+)                                            | SIT PROSITE |
| Arylsulfatase                                                |             |
| Protein-N(pi)-phosphohistidine-sugar phosphotransferase      | SIT         |
| Glucosamine-6-phosphate deaminase                            | SIT PROSITE |
| Phospho-N-acetylmuramoyl-pentapeptide-transferase            |             |
| UDP-glucose 6-dehydrogenase                                  |             |
| mannosaminyltransferase                                      |             |
| Phosphoglycolate phosphatase                                 |             |
| 3-demethylubiquinone-9 3-O-methyltransferase                 |             |
| 1-acylglycerol-3-phosphate O-acyltransferase                 |             |
| Aldose 1-epimerase                                           |             |
| Tagatose-bisphosphate aldolase                               |             |
| 3-hydroxyisobutyrate dehydrogenase                           |             |
| Ribokinase                                                   | SIT         |
| Proteasome endopeptidase complex                             |             |
| Transaldolase                                                | SIT         |
| Protein-N(pi)-phosphohistidine-sugar phosphotransferase      |             |
| Ribulose-phosphate 3-epimerase                               | SIT PROSITE |
| Orotidine-5'-phosphate decarboxylase                         |             |
| L-ribulose-phosphate 4-epimerase                             | SIT         |
| UDP-N-acetylmuramate--L-alanine ligase                       | SIT         |
| Ribulose-phosphate 3-epimerase                               | SIT PROSITE |
| Phosphoglycolate phosphatase                                 |             |
| Formate acetyltransferase activating enzyme                  | SIT PROSITE |
| Biotin--[acetyl-CoA-carboxylase] ligase                      |             |

**ent of EFICAz responsible for the prediction**

| <b>CHIEF-FDR</b> | <b>PFAM-FDR</b> | <b>Number of components</b> |
|------------------|-----------------|-----------------------------|
| CHIEF-FDR        |                 | 1                           |
| CHIEF-FDR        | PFAM-FDR        | 4                           |
|                  | PFAM-FDR        | 1                           |
| CHIEF-FDR        | PFAM-FDR        | 4                           |
| CHIEF-FDR        |                 | 1                           |
| CHIEF-FDR        | PFAM-FDR        | 3                           |
|                  | PFAM-FDR        | 1                           |
| CHIEF-FDR        | PFAM-FDR        | 2                           |
| CHIEF-FDR        | PFAM-FDR        | 2                           |
|                  | PFAM-FDR        | 1                           |
|                  |                 | 1                           |
|                  |                 | 1                           |
| CHIEF-FDR        | PFAM-FDR        | 3                           |
|                  | PFAM-FDR        | 1                           |
|                  |                 | 2                           |
|                  | PFAM-FDR        | 1                           |
|                  | PFAM-FDR        | 1                           |
| CHIEF-FDR        | PFAM-FDR        | 4                           |
|                  |                 | 2                           |
| CHIEF-FDR        | PFAM-FDR        | 4                           |
|                  |                 | 1                           |
|                  |                 | 2                           |
|                  |                 | 1                           |
|                  | PFAM-FDR        | 1                           |
| CHIEF-FDR        |                 | 1                           |
|                  | PFAM-FDR        | 1                           |
| CHIEF-FDR        |                 | 1                           |
| CHIEF-FDR        |                 | 2                           |
| CHIEF-FDR        | PFAM-FDR        | 2                           |
|                  | PFAM-FDR        | 1                           |
| CHIEF-FDR        | PFAM-FDR        | 2                           |
| CHIEF-FDR        |                 | 1                           |
| CHIEF-FDR        | PFAM-FDR        | 2                           |
|                  | PFAM-FDR        | 1                           |
| CHIEF-FDR        | PFAM-FDR        | 4                           |
|                  | PFAM-FDR        | 1                           |
| CHIEF-FDR        |                 | 1                           |
| CHIEF-FDR        |                 | 1                           |
| CHIEF-FDR        |                 | 1                           |
|                  | PFAM-FDR        | 1                           |
|                  | PFAM-FDR        | 1                           |
| CHIEF-FDR        |                 | 2                           |
| CHIEF-FDR        |                 | 1                           |
| CHIEF-FDR        |                 | 1                           |
|                  |                 | 1                           |
| CHIEF-FDR        |                 | 2                           |
|                  | PFAM-FDR        | 1                           |
| CHIEF-FDR        | PFAM-FDR        | 3                           |
| CHIEF-FDR        |                 | 1                           |
| CHIEF-FDR        |                 | 1                           |

1  
PFAM-FDR 1  
CHIEF-FDR 1  
1  
CHIEF-FDR PFAM-FDR 4  
CHIEF-FDR PFAM-FDR 2  
1  
CHIEF-FDR 1  
PFAM-FDR 1  
CHIEF-FDR 1  
CHIEF-FDR PFAM-FDR 2  
CHIEF-FDR 1  
CHIEF-FDR PFAM-FDR 3  
CHIEF-FDR 1  
CHIEF-FDR PFAM-FDR 2  
PFAM-FDR 1  
CHIEF-FDR 1  
CHIEF-FDR 1  
CHIEF-FDR 1  
PFAM-FDR 1  
CHIEF-FDR PFAM-FDR 3  
PFAM-FDR 1  
CHIEF-FDR 1  
CHIEF-FDR 1  
CHIEF-FDR 1  
PFAM-FDR 1  
CHIEF-FDR 1  
2  
CHIEF-FDR PFAM-FDR 3  
PFAM-FDR 1  
PFAM-FDR 1  
PFAM-FDR 1  
CHIEF-FDR PFAM-FDR 3  
CHIEF-FDR PFAM-FDR 3  
PFAM-FDR 1  
CHIEF-FDR PFAM-FDR 2  
CHIEF-FDR PFAM-FDR 4  
CHIEF-FDR 1  
PFAM-FDR 1  
PFAM-FDR 1  
CHIEF-FDR 1  
CHIEF-FDR PFAM-FDR 2  
PFAM-FDR 1  
CHIEF-FDR PFAM-FDR 3  
CHIEF-FDR PFAM-FDR 3  
PFAM-FDR 1  
CHIEF-FDR PFAM-FDR 3  
CHIEF-FDR PFAM-FDR 3  
CHIEF-FDR PFAM-FDR 4  
2  
CHIEF-FDR PFAM-FDR 3  
PFAM-FDR 1

|                    |            |
|--------------------|------------|
|                    | 2          |
| PFAM-FDR           | 2          |
| PFAM-FDR           | 1          |
| CHIEF-FDR PFAM-FDR | 3          |
| CHIEF-FDR          | 1          |
| CHIEF-FDR          | 3          |
| CHIEF-FDR          | 1          |
| CHIEF-FDR          | 2          |
|                    | 2          |
| CHIEF-FDR PFAM-FDR | 2          |
| CHIEF-FDR          | 1          |
| CHIEF-FDR PFAM-FDR | 2          |
|                    | PFAM-FDR 1 |
|                    | PFAM-FDR 1 |
| CHIEF-FDR          | 1          |
| CHIEF-FDR PFAM-FDR | 2          |
| CHIEF-FDR PFAM-FDR | 2          |
| CHIEF-FDR          | 1          |
|                    | 1          |
| CHIEF-FDR PFAM-FDR | 2          |
|                    | 1          |
| CHIEF-FDR          | 1          |
| CHIEF-FDR PFAM-FDR | 4          |
|                    | PFAM-FDR 1 |
| CHIEF-FDR PFAM-FDR | 3          |
| CHIEF-FDR          | 2          |
| CHIEF-FDR PFAM-FDR | 4          |
|                    | PFAM-FDR 1 |
| CHIEF-FDR PFAM-FDR | 4          |
|                    | PFAM-FDR 1 |

## KEGG annotation

probable crotonobetaine/carnitine-CoA ligase [EC:6.3.2.-]  
dimethyladenosine transferase [EC:2.1.1.-]  
ampD protein  
putative carbonic anhydrase [EC:4.2.1.1]  
UDP-3-O-[3-hydroxymyristoyl] glucosamine N-acyltransferase (firA protein) (rifampicin resistance protein) [EC:2.3. carbamate kinase [EC:2.7.2.2]  
hypothetical 44.7 kD protein in adhC-taua intergenic region  
putative nitrate transport permease protein  
hypothetical oxidoreductase in pgpA-ispA intergenic region  
cytochrome o ubiquinol oxidase operon protein cyoD  
cytochrome o ubiquinol oxidase subunit III [EC:1.10.3.-]  
cytochrome o ubiquinol oxidase subunit I [EC:1.10.3.-]  
acyl-CoA thioesterase II [EC:3.1.2.-]  
hypothetical 14.4 kD protein in tesB-hha intergenic region  
acetyl esterase [EC:3.1.1.-]  
hypothetical 41.7 kD protein in nfnB-entD intergenic region  
lipoate-protein ligase B (lipoate biosynthesis protein B) [EC:6.-.-.-]  
endonuclease VIII [EC:3.2.-.-]  
hypothetical 15.6 kD protein in cydB-tolQ intergenic region  
putative pectinesterase  
putative transaldolase [EC:4.1.2.-]  
hypothetical RNA methyltransferase in potI-artJ intergenic region [EC:2.1.1.-]  
anaerobic dimethyl sulfoxide reductase chain A precursor (DMSO reductase) [EC:1.8.99.-]  
putative metalloprotease [EC:3.4.24.-]  
hypothetical 23.8 kD protein in mukB-aspC intergenic region  
putative oxidoreductase  
hypothetical 40.0 kD protein in htrB-dinI intergenic region (ORF39.9)  
putative sarcosine oxidase [EC:1.5.3.1]  
hypothetical 33.0 kD protein in mfd-cobb intergenic region  
putative phage repressor  
umuD protein [EC:3.4.21.-]  
putative dihydroxyacetone kinase  
hypothetical oxidoreductase in btuR-sohB intergenic region [EC:1.-.-.-]  
hypothetical 28.5 kD protein in sapA-aldH intergenic region  
putative phosphatidate cytidyltransferase [EC:2.7.7.41]  
hypothetical 49.6 kD protein in maoC-acpD intergenic region  
putative sulfatase [EC:3.1.6.-]  
hypothetical 31.9 kD protein in hipB-uxaB intergenic region [EC:4.2.1.-]  
putative oxidoreductase  
putative protease ydgD precursor [EC:3.4.21.-]  
hypothetical oxidoreductase in pntA-rstA intergenic region [EC:1.-.-.-]  
N-ethylmaleimide reductase (N-ethylmaleimide reducing enzyme) [EC:1.-.-.-]  
hypothetical 113.2 kD protein in lpp-aroD intergenic region  
vitamin B12 transport system substrate-binding protein  
pts system, cellobiose-specific IIC component (EIIC-Cel) (cellobiose-permease IIC component) (phosphotransfera  
succinylornithine transaminase (succinylornithine aminotransferase) (carbon starvation protein C) [EC:2.6.1.-]  
probable oxidoreductase  
putative aldolase  
hypothetical zinc-type alcohol dehydrogenase-like protein in ansA-gapA intergenic region  
putative dioxygenase alpha subunit yeaw [EC:1.14.1.-]

para-aminobenzoate synthase component I (adc synthase) [EC:4.1.3.-]  
probable protease htpX (heat shock protein htpX) [EC:3.4.24.-]  
putative polar amino acid transport system ATP-binding protein  
putative colanic acid biosynthesis acetyltransferase wcaB [EC:2.3.1.-]  
tagatose-bisphosphate aldolase gatY [EC:4.1.2.-]  
putative autolytic lysozyme  
hypothetical 45.3 kD protein in cdd-mglC intergenic region  
putative transformylase  
elaA protein  
putative regulator  
hypothetical 43.3 kD protein in evgS-glk intergenic region  
putative enzyme  
xanthosine phosphorylase [EC:2.4.2.-]  
oxidoreductase ucpA [EC:1.-.-.-]  
ethanolamine utilization protein eutI  
putative oxidoreductase, Fe-S subunit  
hydrogenase-4 component B [EC:1.-.-.-]  
hydrogenase-4 component D [EC:1.-.-.-]  
hydrogenase-4 component F [EC:1.-.-.-]  
hypothetical protein  
putative oxidoreductase  
putative ATP synthase beta subunit [EC:2.1.1.-]  
hypothetical protein  
hypothetical 20.8 kD protein in gshA-csrA intergenic region  
putative dehydrogenase [EC:1.1.-.-]  
hypothetical 23.2 kD protein in prpB-rpoS intergenic region  
hypothetical sugar kinase in cysJ-eno intergenic region  
hypothetical RNA methyltransferase in relA-barA intergenic region [EC:2.1.1.-]  
probable glucarate dehydratase 2 (GDH) [EC:4.2.1.40]  
hypothetical 32.6 kD protein in syd-sdaC intergenic region  
2-acylglycerophosphoethanolamine acyltransferase / acyl-acyl carrier protein synthetase (2-acyl-gpe acyltransferase)  
hypothetical 44.8 kD protein in kdul-lysS intergenic region  
hypothetical protein  
carbamate kinase [EC:2.7.2.2]  
hypothetical 69.7 kD protein in kdul-lysS intergenic region  
hypothetical 21.1 kD protein in ssr-serA intergenic region (O182)  
methylmalonyl-CoA mutase [EC:5.4.99.2]  
hypothetical 53.8 kD protein in sbm-fba intergenic region (O492)  
hypothetical 34.3 kD protein in epd-cmtA intergenic region (ORF 1) (F321)  
putative metalloprotease [EC:3.4.24.-]  
glycolate oxidase subunit glcD [EC:1.1.3.15]  
hypothetical protein  
hypothetical protein  
topoisomerase IV subunit [EC:5.99.1.-]  
topoisomerase IV subunit B [EC:5.99.1.-]  
hypothetical 48.4 kD protein in glnE-cca intergenic region (ORFXE)  
keto-acid formate acetyltransferase (keto-acid formate-lyase) [EC:2.3.1.54]  
propionate kinase [EC:2.7.2.-]  
tagatose-bisphosphate aldolase agaY [EC:4.1.2.-]  
putative galactosamine-6-phosphate isomerase (galactosamine-6-phosphate deaminase) [EC:5.3.1.-]  
para-aminobenzoate synthase component II [EC:4.1.3.-]  
hypothetical 28.3 kD protein in cysG-trpS intergenic region (O261)

phosphotriesterase homology protein  
biotin sulfoxide reductase 1 (bds reductase 1) (bso reductase 1) [EC:1.-.-.]  
probable hexulose-6-phosphate synthase (HUMPS) (D-arabino 3-hexulose 6-phosphate formaldehyde lyase) [EC:  
probable sugar isomerase sgbE [EC:5.1.3.4]  
hypothetical 15.6 kD protein in secB-tdh intergenic region  
hypothetical 63.2 kD protein in rph-gmk intergenic region  
putative sulfatase [EC:3.1.6.-]  
pts system, arbutin-like IIC component (phosphotransferase enzyme II, C component)  
hypothetical 23.3 kD protein in tnaB-bglB intergenic region  
undecaprenyl-phosphate alpha-N-acetylglucosaminyltransferase [EC:2.4.1.-]  
UDP-N-acetyl-D-mannosaminuronic acid dehydrogenase (UDP-mannaca dehydrogenase) [EC:1.1.1.-]  
probable UDP-N-acetyl-D-mannosaminuronic acid transferase (UDP-mannaca transferase) [EC:2.4.1.-]  
hypothetical 27.1 kD protein in xerC-uvrD intergenic region (ORF 238)  
ubiquinone/menaquinone biosynthesis methyltransferase ubiE [EC:2.1.1.-]  
hypothetical 36.3 kD protein in dsbA-polA intergenic region  
hypothetical 34 kD protein in glnA-rbn intergenic region (F308)  
hypothetical 32 kD protein in glnA-rbn intergenic region (F292)  
putative dehydrogenase [EC:1.1.-.-]  
hypothetical 31.9 kD protein in glnA-rbn intergenic region (O300)  
heat shock protein hslV [EC:3.4.25.-]  
fructose-6-phosphate aldolase 2 [EC:4.1.2.-]  
pts system, fructose-like-2 IIC component (phosphotransferase enzyme II, C component)  
hypothetical 26.1 kD protein in fdhF-phnP intergenic region (F231)  
probable hexulose-6-phosphate synthase (HUMPS) (D-arabino 3-hexulose 6-phosphate formaldehyde lyase) [EC:  
probable sugar isomerase sgaE [EC:5.1.3.4]  
UDP-N-acetylmuramate: L-alanyl-gamma-D-glutamyl-meso-diaminopimelate ligase [EC:6.3.2.-]  
sgcE protein [EC:5.1.3.-]  
hypothetical 25.3 kD protein in rimI-prfC intergenic region  
hypothetical 31.5 kD protein in osmY-deoC intergenic region (F287)  
lipoate-protein ligase A [EC:6.-.-.]

## Swiss-Prot annotation

Probable crotonobetaine/carnitine-CoA ligase (EC 6.3.2.-).

Dimethyladenosine transferase (EC 2.1.1.-) (S-adenosylmethionine-6-N', N'-adenosyl(rRNA) dimethyltransferase) (AmpD protein).

Protein yadF.

UDP-3-O-[3-hydroxymyristoyl] glucosamine N-acyltransferase (EC 2.3.1.-) (FirA protein) (Rifampicin resistance pro Carbamate kinase-like protein yahl).

Hypothetical protein yaiP.

Hypothetical protein yajF.

Hypothetical oxidoreductase yajO (EC 1.-.-.-).

Cytochrome O ubiquinol oxidase protein cyoD (Ubiquinol oxidase chain D).

Cytochrome O ubiquinol oxidase subunit III (EC 1.10.3.-) (Ubiquinol oxidase chain C).

Ubiquinol oxidase polypeptide I (EC 1.10.3.-) (Cytochrome O subunit 1) (Oxidase BO(3) subunit 1) (Cytochrome O Acyl-CoA thioesterase II (EC 3.1.2.-) (TEII).

Hypothetical protein ybaZ.

Acetyl esterase (EC 3.1.1.-).

Hypothetical protein ybdK.

Lipoate-protein ligase B (EC 6.-.-.-) (Lipoate biosynthesis protein B).

Endonuclease VIII (EC 3.2.-.-).

Protein ybgC.

Putative lipoprotein ybHC precursor.

Fructose-6-phosphate aldolase 1 (EC 4.1.2.-).

Hypothetical RNA methyltransferase ybjF (EC 2.1.1.-).

Anaerobic dimethyl sulfoxide reductase chain A precursor (EC 1.8.99.-) (DMSO reductase).

Putative metalloprotease ycaL (EC 3.4.24.-).

Hypothetical protein ycbL.

Hypothetical protein ycbY.

Hypothetical UPF0176 protein yceA (ORF39.9).

N-methyl-L-tryptophan oxidase (EC 1.5.3.-) (MTOX).

Hypothetical protein ycfX.

Putative lambdoid prophage e14 repressor protein C2.

UmuD protein (EC 3.4.21.-) [Contains: UmuD' protein].

Hypothetical protein ycgT.

Hypothetical oxidoreductase yciK (EC 1.-.-.-).

Hypothetical protein ycjL.

Hypothetical protein ynbB.

Hypothetical protein ynbD.

Putative sulfatase ydeN precursor (EC 3.1.6.-).

Putative aldolase yneB (EC 4.2.1.-).

Hypothetical oxidoreductase ydfI (EC 1.-.-.-).

Putative protease ydgD precursor (EC 3.4.21.-).

Hypothetical oxidoreductase ydgB (EC 1.-.-.-).

N-ethylmaleimide reductase (EC 1.-.-.-) (N-ethylmaleimide reducing enzyme).

Hypothetical protein ydiJ.

Vitamin B12 transport periplasmic protein btuE.

PTS system, N,N'-diacetylchitobiose-specific IIC component (EIIC-Chb) (N,N'-diacetylchitobiose-permease IIC corr Succinylornithine transaminase (EC 2.6.1.-) (Succinylornithine aminotransferase) (Carbon starvation protein C).

Hypothetical oxidoreductase ydjG (EC 1.-.-.-).

Hypothetical protein ydjI.

Hypothetical zinc-type alcohol dehydrogenase-like protein ydjJ.

Putative dioxygenase alpha subunit yeaW (EC 1.14.1.-).



Para-aminobenzoate synthase component I (EC 4.1.3.-) (ADC synthase).  
Probable protease htpX (EC 3.4.24.-) (Heat shock protein htpX).  
Hypothetical amino-acid ABC transporter ATP-binding protein yecC.  
Putative colanic acid biosynthesis acetyltransferase wcaB (EC 2.3.1.-).  
Tagatose-1,6-bisphosphate aldolase gatY (EC 4.1.2.-) (TBPA).  
Hypothetical protein yegX.  
Hypothetical protein yeiA.  
Hypothetical protein yfbG.  
Protein elaA.  
Putative Nudix hydrolase yfcD (EC 3.6.-.-).  
Hypothetical protein yfdE.  
Hypothetical protein yfdW.  
Xanthosine phosphorylase (EC 2.4.2.-).  
Oxidoreductase ucpA (EC 1.-.-.-).  
Ethanolamine utilization protein eutD.  
AegA protein.  
Hydrogenase-4 component B (EC 1.-.-.-).  
Hydrogenase-4 component D (EC 1.-.-.-).  
Hydrogenase-4 component F (EC 1.-.-.-).  
Hypothetical protein yfgC precursor.  
Protein yfgD.  
Hypothetical tRNA/rRNA methyltransferase yfhQ (EC 2.1.1.-).  
Putative arsenate reductase (EC 1.20.4.1) (Arsenical pump modifier) (Fragment).  
Hypothetical protein yqaB.  
Hypothetical oxidoreductase ygbJ (EC 1.1.-.-).  
Hypothetical aldolase class II protein ygbL.  
Hypothetical sugar kinase ygcE.  
23S rRNA (Uracil-5-)-methyltransferase rumA (EC 2.1.1.-) (23S rRNA(M- 5-U1939)-methyltransferase).  
Glucarate dehydratase related protein (EC 4.2.1.-) (GDH-RP) (GlucDRP).  
Hypothetical protein yqcD.  
AAS bifunctional protein [Includes: 2-acylglycerophosphoethanolamine acyltransferase (2-acyl-GPE acyltransferase)  
Hypothetical protein ygeY.  
Hypothetical hydrolase ygeZ (EC 3.-.-.-).  
Carbamate kinase-like protein yqeA.  
Hypothetical protein ygfT.  
Hypothetical protein ygfA.  
Sbm protein.  
Hypothetical protein ygfH.  
Hypothetical protein yggF.  
Putative metalloprotease yggG (EC 3.4.24.-).  
Glycolate oxidase subunit glcD.

Hypothetical protein ygiQ.  
Topoisomerase IV subunit A (EC 5.99.1.-).  
Topoisomerase IV subunit B (EC 5.99.1.-).  
Hypothetical protein ygiF (ORFXE).  
Keto-acid formate acetyltransferase (EC 2.3.1.-) (Keto-acid formate- lyase).  
Propionate kinase (EC 2.7.2.-).  
Tagatose-1,6-bisphosphate aldolase agaY (EC 4.1.2.-) (TBPA).  
Putative galactosamine-6-phosphate isomerase (EC 5.3.1.-) (Galactosamine-6-phosphate deaminase).  
Para-aminobenzoate synthase glutamine amidotransferase component II (EC 4.1.3.-).  
Hypothetical sugar kinase yhfQ.

Phosphotriesterase homology protein.  
Biotin sulfoxide reductase (EC 1.-.-) (BDS reductase) (BSO reductase).  
Probable hexulose-6-phosphate synthase (EC 4.1.2.-) (HUMPS) (D-arabino 3-hexulose 6-phosphate formaldehyde  
Probable sugar isomerase sgbE (EC 5.1.-.-).  
Hypothetical protein yibN.  
Hypothetical DNA ligase-like protein yicF.  
Putative sulfatase yidJ (EC 3.1.6.-).  
PTS system, arbutin-like IIC component (Phosphotransferase enzyme II, C component).  
Hypothetical protein yieK.  
Undecaprenyl-phosphate alpha-N-acetylglucosaminyl 1-phosphate transferase (EC 2.7.8.-) (UDP-GlcNAc:undecap  
UDP-N-acetyl-D-mannosamine dehydrogenase (EC 1.1.1.-) (UDP-ManNAc dehydrogenase).  
Probable UDP-N-acetyl-D-mannosaminuronic acid transferase (EC 2.4.1.-) (UDP-ManNAcA transferase).  
Hypothetical protein yigB.  
Ubiquinone/menaquinone biosynthesis methyltransferase ubiE (EC 2.1.1.-).  
Hypothetical protein yihG.  
Hypothetical protein yihR.  
Hypothetical protein yihT.  
Hypothetical oxidoreductase yihU (EC 1.1.-.-).  
Hypothetical sugar kinase yihV.  
ATP-dependent protease hslV (EC 3.4.25.-) (Heat shock protein hslV).  
Fructose-6-phosphate aldolase 2 (EC 4.1.2.-).  
PTS system, fructose-like-2 IIC component (Phosphotransferase enzyme II, C component).  
D-allulose-6-phosphate 3-epimerase (EC 5.1.3.-).  
Probable hexulose-6-phosphate synthase (EC 4.1.2.-) (HUMPS) (D-arabino 3-hexulose 6-phosphate formaldehyde  
Probable sugar isomerase sgaE (EC 5.1.-.-).  
UDP-N-acetylmuramate:L-alanyl-gamma-D-glutamyl-meso-diaminopimelate ligase (EC 6.3.2.-) (Murein peptide lig  
Protein sgcE (EC 5.1.3.-).  
Hypothetical protein yjjG.  
Hypothetical protein yjjW.  
Lipoate-protein ligase A (EC 6.-.-).

(16S rRNA dimethylase) (High level kasugamycin resistance protein ksgA) (Kasugamycin dimethyltransferase).

rotein).

ubiquinol oxidase subunit 1) (Ubiquinol oxidase chain A).

nponent) (Phosphotransferase enzyme II, C component).

ie); Acyl-acyl carrier protein synthetase (Acyl-ACP synthetase)].

e lyase).

prenyl-phosphate GlcNAc-1- phosphate transferase).

e lyase).

ase).

| Protein id | Swiss-Prot |                  | Gene name | EcoGene name | GenBank GI number |
|------------|------------|------------------|-----------|--------------|-------------------|
|            | Entry name | Accession Number |           |              |                   |
| b0030      | YAAF_ECOLI | P22564           | rihC      | EG11082      | 1786213           |
| b0037      | CAIC_ECOLI | P31552           | caiC      | EG11558      | 1786221           |
| b0039      | CAIA_ECOLI | P31571           | caiA      | EG11560      | 1786223           |
| b0051      | KSGA_ECOLI | P06992           | ksgA      | EG10523      | 1786236           |
| b0110      | AMPD_ECOLI | P13016           | ampD      | EG10041      | 1786300           |
| b0126      | YADF_ECOLI | P36857           | yadF      | EG12319      | 1786318           |
| b0144      | YADB_ECOLI | P27305           | yadB      | EG11362      | 1786337           |
| b0161      | DEGP_ECOLI | P09376           | degP      | EG10463      | 1786356           |
| b0179      | LPXD_ECOLI | P21645           | lpxD      | EG10316      | 1786376           |
| b0200      | YAED_ECOLI | P31546           | gmhB      | EG11736      | 1786399           |
| b0269      | YAGF_ECOLI | P77596           | yagF      | EG13345      | 1786464           |
| b0323      | ARCM_ECOLI | P77624           | yahI      | EG13593      | 1786516           |
| b0325      | YAHK_ECOLI | P75691           | yahK      | EG13595      | 1786518           |
| b0347      | MHPA_ECOLI | P77397           | mhpA      | EG20273      | 1786543           |
| b0348      | MHPB_ECOLI | P54711           | mhpB      | EG20274      | 1786544           |
| b0363      | YAIP_ECOLI | Q47536           | yaiP      | EG13298      | 1786560           |
| b0394      | YAJF_ECOLI | P23917           | mak       | EG11288      | 1786593           |
| b0419      | YAJO_ECOLI | P77735           | yajO      | EG13611      | 1786621           |
| b0429      | CYOD_ECOLI | P18403           | cyoD      | EG10181      | 1786632           |
| b0430      | CYOC_ECOLI | P18402           | cyoC      | EG10180      | 1786633           |
| b0431      | CYOB_ECOLI | P18401           | cyoB      | EG10179      | 1786634           |
| b0452      | TESB_ECOLI | P23911           | tesB      | EG10995      | 1786657           |
| b0454      | YBAZ_ECOLI | P75707           | ybaZ      | EG13254      | 1786659           |
| b0476      | AES_ECOLI  | P23872           | aes       | EG11101      | 1786682           |
| b0493      | YBBO_ECOLI | P77388           | ybbO      | EG13262      | 1786701           |
| b0581      | YBDK_ECOLI | P77213           | ybdK      | EG13644      | 1786795           |
| b0599      | YBDH_ECOLI | P45579           | ybdH      | EG12692      | 1786815           |
| b0606      | AHPF_ECOLI | P35340           | ahpF      | EG11385      | 1786823           |
| b0608      | YBDR_ECOLI | P77316           | ybdR      | EG13537      | 1786825           |
| b0630      | LIPB_ECOLI | P30976           | lipB      | EG11591      | 1786848           |
| b0651      | YBEK_ECOLI | P41409           | rihA      | EG12701      | 1786871           |
| b0662      | UBIF_ECOLI | P75728           | ubiF      | EG13658      | 1786883           |
| b0676      | NAGC_ECOLI | P15301           | nagC      | EG10636      | 1786891           |
| b0714      | END8_ECOLI | P50465           | nei       | EG13237      | 1786932           |
| b0732      | YBGG_ECOLI | P54746           | ybgG      | EG13236      | 1786952           |
| b0736      | YBGC_ECOLI | P08999           | ybgC      | EG11110      | 1786957           |
| b0772      | YBHC_ECOLI | P46130           | ybhC      | EG12875      | 1786989           |
| b0777      | BIOC_ECOLI | P12999           | bioC      | EG10119      | 1786994           |
| b0790      | YBHP_ECOLI | P75772           | ybhP      | EG13672      | 1787008           |
| b0801      | YBIC_ECOLI | P30178           | ybiC      | EG11581      | 1787020           |
| b0825      | FSAA_ECOLI | P78055           | fsaA      | EG13471      | 1787046           |
| b0841      | YBJG_ECOLI | P75806           | ybjG      | EG13676      | 1787064           |
| b0851      | NFSA_ECOLI | P17117           | nfsA      | EG11261      | 1787075           |
| b0859      | YBJF_ECOLI | P75817           | ybjF      | EG13427      | 1787083           |
| b0894      | DMSA_ECOLI | P18775           | dmsA      | EG10232      | 1787121           |
| b0909      | YCAL_ECOLI | P43674           | ycaL      | EG13133      | 1787138           |
| b0927      | YCBL_ECOLI | P75849           | ycbL      | EG13704      | 1787158           |
| b0948      | YCBY_ECOLI | P75864           | ycbY      | EG13717      | 1787181           |
| b1008      | YCDI_ECOLI | P75894           | ycdI      | EG13855      | 1787243           |
| b1022      | YCDQ_ECOLI | P75905           | ycdQ      | EG13863      | 1787259           |

|       |            |        |      |         |         |
|-------|------------|--------|------|---------|---------|
| b1055 | YCEA_ECOLI | P24188 | yceA | EG11116 | 1787294 |
| b1059 | MTOX_ECOLI | P40874 | solA | EG12669 | 1787298 |
| b1119 | YCFX_ECOLI | P75959 | ycfX | EG13442 | 1787363 |
| b1126 | POTA_ECOLI | P23858 | potA | EG10749 | 1787370 |
| b1145 | YMFK_ECOLI | P75974 | ymfK | EG14249 | 1787391 |
| b1183 | UMUD_ECOLI | P04153 | umuD | EG11057 | 1787431 |
| b1200 | YCGT_ECOLI | P76015 | dhaK | EG13901 | 1787450 |
| b1212 | HEMK_ECOLI | P37186 | prmC | EG12424 | 1787463 |
| b1271 | YCIK_ECOLI | P31808 | yciK | EG11759 | 1787526 |
| b1298 | YCJL_ECOLI | P76038 | ycjL | EG13909 | 1787556 |
| b1378 | NIFJ_ECOLI | P52647 | ydbK | EG13183 | 1787642 |
| b1397 | PAAJ_ECOLI | P77525 | paaJ | EG13744 | 1787663 |
| b1408 | YNBA_ECOLI | P76090 | ynbA | EG13748 | 1787676 |
| b1409 | YNBB_ECOLI | P76091 | ynbB | EG13749 | 1787677 |
| b1411 | YNBD_ECOLI | P76093 | ynbD | EG13751 | 1787679 |
| b1439 | YDCR_ECOLI | P77730 | ydcR | EG13761 | 1787710 |
| b1441 | YDCT_ECOLI | P77795 | ydcT | EG13763 | 1787712 |
| b1494 | PQQL_ECOLI | P31828 | pqqL | EG11744 | 1787770 |
| b1498 | YDEN_ECOLI | P77318 | ydeN | EG13796 | 1787775 |
| b1511 | YDEV_ECOLI | P77432 | ydeV | EG13804 | 1787789 |
| b1517 | YNEB_ECOLI | P76143 | lsrF | EG13810 | 1787796 |
| b1525 | YNEI_ECOLI | P76149 | yneI | EG13817 | 1787805 |
| b1539 | YDFG_ECOLI | P39831 | ydfG | EG12345 | 1787820 |
| b1542 | YDFI_ECOLI | P77260 | ydfI | EG13821 | 1787823 |
| b1580 | RSPB_ECOLI | P38105 | rspB | EG12452 | 1787863 |
| b1594 | MLC_ECOLI  | P50456 | dgsA | EG13156 | 1787878 |
| b1598 | YDGD_ECOLI | P76176 | ydgD | EG13925 | 1787882 |
| b1606 | YDGB_ECOLI | P52109 | ydgB | EG13189 | 1787891 |
| b1647 | YDHF_ECOLI | P76187 | ydhF | EG13420 | 1787936 |
| b1650 | NEMA_ECOLI | P77258 | nema | EG13546 | 1787939 |
| b1687 | YDIJ_ECOLI | P77748 | ydiJ | EG13969 | 1787977 |
| b1694 | YDIF_ECOLI | P37766 | ydiF | EG12432 | 1787985 |
| b1695 | YDIO_ECOLI | P76200 | ydiO | EG13974 | 1787986 |
| b1710 | BTUE_ECOLI | P06610 | btuE | EG10129 | 1788003 |
| b1737 | PTCC_ECOLI | P17334 | chbC | EG10141 | 1788032 |
| b1748 | ARGM_ECOLI | P77581 | argM | EG13999 | 1788044 |
| b1758 | YNJF_ECOLI | P76226 | ynjF | EG14008 | 1788055 |
| b1771 | YDJG_ECOLI | P77256 | ydjG | EG13483 | 1788070 |
| b1772 | YDJH_ECOLI | P77493 | ydjH | EG13484 | 1788071 |
| b1773 | YDJI_ECOLI | P77704 | ydjI | EG13485 | 1788072 |
| b1774 | YDJJ_ECOLI | P77280 | ydjJ | EG13486 | 1788073 |
| b1781 | YEAE_ECOLI | P76234 | yeaE | EG13491 | 1788081 |
| b1802 | YEAW_ECOLI | P76253 | yeaW | EG13509 | 1788103 |
| b1812 | PABB_ECOLI | P05041 | pabB | EG10683 | 1788114 |
| b1829 | HTPX_ECOLI | P23894 | htpX | EG10462 | 1788133 |
| b1917 | YECC_ECOLI | P37774 | yecC | EG12347 | 1788225 |
| b2033 | WBBJ_ECOLI | P37750 | wbbJ | EG11984 | 1788345 |
| b2054 | WCAF_ECOLI | P71240 | wcaF | EG13574 | 1788367 |
| b2058 | WCAB_ECOLI | P77558 | wcaB | EG13570 | 1788371 |
| b2086 | YEGS_ECOLI | P76407 | yegS | EG14367 | 1788402 |
| b2096 | GATY_ECOLI | P37192 | gatY | EG12419 | 1788412 |
| b2099 | YEGU_ECOLI | P76418 | yegU | EG14064 | 1788416 |

|       |            |        |      |         |         |
|-------|------------|--------|------|---------|---------|
| b2100 | YEGV_ECOLI | P76419 | yegV | EG14065 | 1788417 |
| b2102 | YEGX_ECOLI | P76421 | yegX | EG14067 | 1788419 |
| b2147 | YEIA_ECOLI | P25889 | yeiA | EG11289 | 1788469 |
| b2160 | YEII_ECOLI | P33020 | yeil | EG12028 | 1788484 |
| b2162 | YEIK_ECOLI | P33022 | rihB | EG12030 | 1788486 |
| b2166 | YEIC_ECOLI | P30235 | yeiC | EG11646 | 1788491 |
| b2172 | YEIQ_ECOLI | P33029 | yeiQ | EG12036 | 1788497 |
| b2245 | YFAU_ECOLI | P76469 | yfaU | EG14083 | 1788578 |
| b2254 | ARNC_ECOLI | P77757 | arnC | EG14090 | 1788588 |
| b2255 | YFBG_ECOLI | P77398 | arnA | EG14091 | 1788589 |
| b2267 | ELAA_ECOLI | P52077 | elaA | EG13184 | 1788602 |
| b2290 | YFBQ_ECOLI | P77727 | yfbQ | EG14101 | 1788627 |
| b2299 | YFCD_ECOLI | P76494 | yfcD | EG14107 | 1788637 |
| b2371 | YFDE_ECOLI | P76518 | yfdE | EG13284 | 1788714 |
| b2374 | YFDW_ECOLI | P77407 | yfdW | EG14145 | 1788717 |
| b2379 | YFDZ_ECOLI | P77434 | yfdZ | EG14198 | 1788722 |
| b2407 | XAPA_ECOLI | P45563 | xapA | EG20250 | 1788746 |
| b2426 | UCPA_ECOLI | P37440 | ucpA | EG12133 | 1788766 |
| b2453 | EUTG_ECOLI | P76553 | eutG | EG14183 | 1788795 |
| b2458 | EUTD_ECOLI | P77218 | eutD | EG14188 | 1788800 |
| b2467 | YFFH_ECOLI | P37128 | yffH | EG12410 | 1788810 |
| b2468 | AEGA_ECOLI | P37127 | aegA | EG12409 | 1788811 |
| b2482 | HYFB_ECOLI | P23482 | hyfB | EG11282 | 1788827 |
| b2484 | HYFD_ECOLI | P77416 | hyfD | EG14212 | 1788829 |
| b2486 | HYFF_ECOLI | P77437 | hyfF | EG14214 | 1788831 |
| b2494 | YFGC_ECOLI | P76568 | yfgC | EG14199 | 1788840 |
| b2495 | YFGD_ECOLI | P76569 | yfgD | EG14200 | 1788841 |
| b2532 | YFHQ_ECOLI | P77438 | yfhQ | EG13452 | 1788881 |
| b2538 | HCAE_ECOLI | Q47139 | hcaE | EG13456 | 1788888 |
| b2539 | HCAF_ECOLI | Q47140 | hcaF | EG13457 | 1788889 |
| b2541 | HCAB_ECOLI | P77646 | hcaB | EG13459 | 1788891 |
| b2545 | YPHC_ECOLI | P77360 | yphC | EG13464 | 1788895 |
| b2550 | YPHH_ECOLI | P76586 | yphH | EG13469 | 1788901 |
| b2559 | YFHC_ECOLI | P30134 | tadA | EG11372 | 1788911 |
| b2581 | YFIF_ECOLI | P33635 | yfiF | EG11786 | 1788935 |
| b2638 | YFJU_ECOLI | P52136 | yfjU | EG13207 | 1788991 |
| b2690 | YQAB_ECOLI | P77475 | yqaB | EG13530 | 1789046 |
| b2711 | NORW_ECOLI | P37596 | norW | EG12450 | 1789065 |
| b2736 | YGBJ_ECOLI | Q46888 | ygbJ | EG13104 | 1789092 |
| b2738 | YGBL_ECOLI | Q46890 | ygbL | EG13106 | 1789094 |
| b2739 | YGBM_ECOLI | Q46891 | ygbM | EG13107 | 1789095 |
| b2774 | YGCW_ECOLI | P76633 | ygcW | EG13130 | 1789135 |
| b2776 | YGCE_ECOLI | P55138 | ygcE | EG13033 | 1789138 |
| b2785 | RUMA_ECOLI | P55135 | rumA | EG11247 | 1789148 |
| b2788 | GUDX_ECOLI | Q46915 | gudX | EG13168 | 1789151 |
| b2794 | YQCD_ECOLI | Q46920 | yqcD | EG13173 | 1789158 |
| b2834 | TAS_ECOLI  | Q46933 | tas  | EG13093 | 1789199 |
| b2836 | AAS_ECOLI  | P31119 | aas  | EG11679 | 1789201 |
| b2840 | YGEA_ECOLI | P03813 | ygeA | EG11157 | 1789205 |
| b2870 | YGEW_ECOLI | Q46803 | ygeW | EG13053 | 1789234 |
| b2872 | YGEY_ECOLI | Q46805 | ygeY | EG13055 | 1789236 |
| b2873 | YGEZ_ECOLI | Q46806 | hyuA | EG13056 | 1789237 |



|       |            |        |      |         |         |
|-------|------------|--------|------|---------|---------|
| b2874 | ARCL_ECOLI | Q46807 | yqeA | EG13057 | 1789238 |
| b2878 | YGFK_ECOLI | Q46811 | ygfK | EG13061 | 1789243 |
| b2887 | YGFT_ECOLI | Q46820 | ygfT | EG13070 | 1789253 |
| b2902 | YGFF_ECOLI | P52037 | ygfF | EG12971 | 2367175 |
| b2906 | VISC_ECOLI | P25535 | visC | EG11333 | 1789273 |
| b2912 | YGFA_ECOLI | P09160 | ygfA | EG11158 | 1789278 |
| b2917 | SBM_ECOLI  | P27253 | ylik | EG11444 | 1789284 |
| b2920 | YGFH_ECOLI | P52043 | ygfH | EG12973 | 1789287 |
| b2927 | E4PD_ECOLI | P11603 | epd  | EG10368 | 1789295 |
| b2930 | YGGF_ECOLI | P21437 | yggF | EG11245 | 1789298 |
| b2936 | YGGG_ECOLI | P25894 | yggG | EG11291 | 1789305 |
| b2954 | HAM1_ECOLI | P52061 | rdgB | EG12982 | 1789324 |
| b2979 | GLCD_ECOLI | P52075 | glcD | EG12997 | 1789351 |
| b2999 | Q46849     | None   | yghX | EG13008 | 1789373 |
| b3003 | YGHA_ECOLI | P25887 | yghA | EG11292 | 1789378 |
| b3011 | YQHD_ECOLI | Q46856 | yqhD | EG13014 | 1789386 |
| b3015 | YGIQ_ECOLI |        | ygiQ | EG13019 | 1789391 |
| b3019 | PARC_ECOLI | P20082 | parC | EG10686 | 1789396 |
| b3030 | PARE_ECOLI | P20083 | parE | EG10687 | 1789408 |
| b3038 | YGIC_ECOLI | P24196 | ygiC | EG11165 | 1789416 |
| b3039 | YGID_ECOLI | P24197 | ygiD | EG11166 | 1789417 |
| b3052 | RFAE_ECOLI | P76658 | rfaE | EG13416 | 1789432 |
| b3054 | YGIF_ECOLI | P30871 | ygiF | EG11603 | 1789434 |
| b3114 | TDCE_ECOLI | P42632 | tdcE | EG12758 | 1789502 |
| b3115 | TDCD_ECOLI | P11868 | tdcD | EG11172 | 1789503 |
| b3137 | AGAY_ECOLI | P42908 | kbaY | EG12768 | 1789526 |
| b3141 | AGAI_ECOLI | P42912 | agal | EG12772 | 1789530 |
| b3146 | YRAL_ECOLI | P45528 | yraL | EG12777 | 1789535 |
| b3160 | YHBW_ECOLI | P45529 | yhbW | EG12792 | 1789551 |
| b3187 | ISPB_ECOLI | P19641 | ispB | EG10017 | 1789578 |
| b3234 | DEGQ_ECOLI | P39099 | degQ | EG12612 | 1789629 |
| b3235 | DEGS_ECOLI | P31137 | degS | EG11652 | 1789630 |
| b3271 | YHDZ_ECOLI | P45769 | yhdZ | EG12837 | 1789672 |
| b3360 | PABA_ECOLI | P00903 | pabA | EG10682 | 1789760 |
| b3374 | YHFQ_ECOLI | P45543 | frlD | EG12912 | 1789775 |
| b3379 | PHP_ECOLI  | P45548 | php  | EG12917 | 1789780 |
| b3380 | YHFW_ECOLI | P45549 | yhfW | EG12918 | 1789781 |
| b3431 | GLGX_ECOLI | P15067 | glgX | EG10381 | 2367229 |
| b3551 | BISC_ECOLI | P20099 | bisC | EG10124 | 1789973 |
| b3575 | YIAK_ECOLI | P37672 | yiaK | EG12279 | 1790000 |
| b3581 | SGBH_ECOLI | P37678 | sgbH | EG12285 | 1790006 |
| b3583 | SGBE_ECOLI | P37680 | sgbE | EG12287 | 1790008 |
| b3606 | YIBK_ECOLI | P33899 | yibK | EG11888 | 1790034 |
| b3611 | YIBN_ECOLI | P37688 | yibN | EG12295 | 1790040 |
| b3647 | YICF_ECOLI | P25772 | ligB | EG11334 | 1790079 |
| b3656 | YICI_ECOLI | P31434 | yicl | EG11685 | 2367256 |
| b3678 | YIDJ_ECOLI | P31447 | ydjJ | EG11705 | 1790112 |
| b3683 | PTIC_ECOLI | P31452 | glvC | EG11710 | 1790117 |
| b3715 | YIEH_ECOLI | P31467 | yieH | EG11725 | 1790151 |
| b3718 | YIEK_ECOLI | P31470 | yieK | EG11728 | 1790155 |
| b3784 | WECA_ECOLI | P24235 | rfe  | EG10840 | 1790218 |
| b3787 | WECC_ECOLI | P27829 | rffD | EG11452 | 2367284 |

|       |            |        |      |         |         |
|-------|------------|--------|------|---------|---------|
| b3794 | WECG_ECOLI | P27836 | rffM | EG11458 | 2367289 |
| b3812 | YIGB_ECOLI | P23306 | yigB | EG11202 | 2367295 |
| b3833 | UBIE_ECOLI | P27851 | ubiE | EG11473 | 2367307 |
| b3862 | YIHG_ECOLI | P32129 | yihG | EG11833 | 1790293 |
| b3878 | YIHQ_ECOLI | P32138 | yihQ | EG11843 | 2367323 |
| b3879 | YIHR_ECOLI | P32139 | yihR | EG11844 | 1790311 |
| b3881 | YIHT_ECOLI | P32141 | yihT | EG11846 | 1790314 |
| b3882 | YIHU_ECOLI | P32142 | yihU | EG11847 | 1790315 |
| b3883 | YIHV_ECOLI | P32143 | yihV | EG11848 | 1790316 |
| b3897 | FRVR_ECOLI | P32152 | frvR | EG11861 | 1790331 |
| b3932 | HSLV_ECOLI | P31059 | hslV | EG11676 | 1790367 |
| b3946 | FSAB_ECOLI | P32669 | fsaB | EG11905 | 1790382 |
| b3949 | PTWC_ECOLI | P32672 | frwC | EG11908 | 1790386 |
| b4085 | ALSE_ECOLI | P32719 | alsE | EG11957 | 1790523 |
| b4180 | YJFH_ECOLI | P39290 | rlmB | EG12483 | 1790623 |
| b4186 | YJFC_ECOLI | P33222 | yjfC | EG11812 | 1790629 |
| b4187 | AIDB_ECOLI | P33224 | aidB | EG11811 | 1790630 |
| b4196 | SGAH_ECOLI | P39304 | ulaD | EG12496 | 1790640 |
| b4198 | SGAE_ECOLI | P39306 | ulaF | EG12498 | 1790642 |
| b4233 | MPL_ECOLI  | P37773 | mpl  | EG12440 | 1790680 |
| b4249 | YJGI_ECOLI | P39333 | yjgl | EG12528 | 2367365 |
| b4297 | YJHG_ECOLI | P39358 | yjhG | EG12549 | 2367371 |
| b4301 | SGCE_ECOLI | P39362 | sgcE | EG12553 | 1790754 |
| b4340 | YJIR_ECOLI | P39389 | yjiR | EG12579 | 1790797 |
| b4374 | YJJG_ECOLI | P33999 | yjjG | EG12115 | 1790833 |
| b4379 | YJJW_ECOLI | P39409 | yjjW | EG12599 | 1790839 |
| b4386 | LPLA_ECOLI | P32099 | lplA | EG11796 | 1790846 |
| b4403 | LAST_ECOLI | P37005 | lasT | EG12309 | 1790865 |

**EFICAz predicted 4 digit EC number**

3.2.2  
6.2.1  
1.3.99  
2.1.1  
3.5.1  
4.2.1  
6.1.1  
3.4.21  
2.3.1  
3.1.3  
4.2.1  
2.7.2  
1.1.1  
1.14.13  
1.13.11  
2.4.1  
2.7.1  
1.1.1  
1.9.3  
1.9.3  
1.9.3  
3.1.2  
2.1.1  
3.1.1  
1.1.1  
6.3.2  
1.1.1  
1.6.99  
1.1.1  
6.3.4  
3.2.2  
1.14.13  
2.7.1  
3.2.2  
3.2.1  
3.1.2  
3.1.1  
2.1.1  
3.1.3;3.1.4  
1.1.1  
2.2.1  
3.1.3  
1.6.99  
2.1.1  
1.7.2  
3.4.24  
3.1.2  
2.1.1  
1.6.99  
2.4.1

2.8.1  
1.5.3  
2.7.1  
3.6.3  
3.4.21  
3.4.21  
2.7.1  
2.1.1  
1.1.1  
3.4.19  
1.2.7  
2.3.1  
2.7.8  
2.7.7  
3.1.3  
2.6.1  
3.6.3  
3.4.24  
3.1.6  
2.7.1  
4.1.2  
1.2.1  
1.1.1  
1.1.1  
1.1.1  
2.7.1  
3.4.21  
1.3.1  
1.1.1  
1.6.99  
1.1.2  
2.8.3  
1.3.99  
1.11.1  
2.7.1  
2.6.1  
2.7.8  
1.1.1  
2.7.1  
4.1.2  
1.1.1  
1.1.1  
1.14.15  
4.1.3  
3.4.24  
3.6.3  
2.3.1  
2.3.1  
2.3.1  
2.7.1  
4.1.2  
3.2.2

2.7.1  
3.2.1  
1.3.3  
2.7.1  
3.2.2  
2.7.1  
1.1.1  
4.1.2  
2.4.1  
2.1.2  
6.2.1  
2.6.1  
5.3.3  
5.1.99  
5.1.99  
2.6.1  
2.4.2  
1.1.1  
1.1.1  
2.3.1  
3.6.1  
1.4.1  
1.6.5  
1.6.5  
1.6.5  
3.4.24  
1.20.4  
2.1.1  
1.14.12  
1.14.12  
1.1.1;1.3.1  
1.1.1  
2.7.1  
3.5.4  
2.1.1  
1.20.4  
5.4.2  
1.18.1  
1.1.1  
4.1.2  
5.3.1  
1.1.1  
2.7.1  
2.1.1  
4.2.1  
3.5.4  
1.1.1  
1.2.1;2.3.1  
5.1.1  
2.1.3  
3.4.13  
3.5.2

2.7.2  
1.4.1  
1.4.1  
1.1.1  
1.14.13  
6.3.3  
5.4.99  
3.1.2  
1.2.1  
3.1.3  
3.4.24  
3.6.1  
1.1.2  
3.1.1  
1.1.1;1.3.1  
1.1.1  
1.97.1  
5.99.1  
5.99.1  
6.3.1  
1.13.11  
2.7.1;2.7.7  
3.6.1  
2.3.1  
2.7.2  
4.1.2  
3.5.99  
2.1.1  
1.14.14  
2.5.1  
3.4.21  
3.4.21  
3.6.3  
4.1.3  
2.7.1  
3.1.8  
5.4.2  
2.4.1;3.2.1  
1.7.2  
1.1.1  
4.1.1  
5.1.3  
2.1.1  
2.8.1  
6.5.1  
3.2.1  
3.1.6  
2.7.1  
3.8.1  
3.5.99  
2.7.8  
1.1.1

2.4.1  
3.1.3  
2.1.1  
2.3.1  
3.2.1  
5.1.3  
4.1.2  
1.1.1  
2.7.1  
2.7.1  
3.4.25  
2.2.1  
2.7.1  
5.1.3  
2.1.1  
6.3.1  
1.3.99  
4.1.1  
5.1.3  
6.3.2  
1.1.1  
4.2.1  
5.1.3  
2.6.1  
3.1.3  
1.97.1  
6.3.4  
2.1.1

## Enzyme function description

Hydrolases, glycosylases, hydrolyzing N-glycosyl compounds  
Ligases, forming carbon-sulfur bonds, acid--thiol ligases  
Oxidoreductases, acting on the CH-CH group of donors, with other acceptors  
Transferases, transferring one-carbon groups, methyltransferases  
Hydrolases, acting on carbon-nitrogen bonds, other than peptide bonds, in linear amides  
Lyases, carbon-oxygen lyases, hydro-lyases  
Ligases, forming carbon-oxygen bonds, ligases forming aminoacyl-tRNA and related compounds  
Hydrolases, acting on peptide bonds (peptide hydrolases), serine endopeptidases  
Transferases, acyltransferases, transferring groups other than amino-acyl groups  
Hydrolases, acting on ester bonds, phosphoric monoester hydrolases  
Lyases, carbon-oxygen lyases, hydro-lyases  
Transferases, transferring phosphorous-containing groups, phosphotransferases with a carboxyl group as acceptor  
Oxidoreductases, acting on the CH-OH group of donors, with NAD(+) or NADP(+) as acceptor  
Oxidoreductases, miscellaneous (requires further characterization), miscellaneous (requires further characterization)  
Oxidoreductases, acting on single donors with incorporation of molecular oxygen, with incorporation of two atoms  
Transferases, glycosyltransferases, hexosyltransferases  
Transferases, transferring phosphorous-containing groups, phosphotransferases with an alcohol group as acceptor  
Oxidoreductases, acting on the CH-OH group of donors, with NAD(+) or NADP(+) as acceptor  
Oxidoreductases, acting on a heme group of donors, with oxygen as acceptor  
Oxidoreductases, acting on a heme group of donors, with oxygen as acceptor  
Oxidoreductases, acting on a heme group of donors, with oxygen as acceptor  
Hydrolases, acting on ester bonds, thiolester hydrolases  
Transferases, transferring one-carbon groups, methyltransferases  
Hydrolases, acting on ester bonds, carboxylic ester hydrolases  
Oxidoreductases, acting on the CH-OH group of donors, with NAD(+) or NADP(+) as acceptor  
Ligases, forming carbon-nitrogen bonds, acid--D-amino-acid ligases (peptide synthases)  
Oxidoreductases, acting on the CH-OH group of donors, with NAD(+) or NADP(+) as acceptor  
Oxidoreductases, acting on NADH or NADPH, with other acceptors  
Oxidoreductases, acting on the CH-OH group of donors, with NAD(+) or NADP(+) as acceptor  
Ligases, forming carbon-nitrogen bonds, other carbon--nitrogen ligases  
Hydrolases, glycosylases, hydrolyzing N-glycosyl compounds  
Oxidoreductases, miscellaneous (requires further characterization), miscellaneous (requires further characterization)  
Transferases, transferring phosphorous-containing groups, phosphotransferases with an alcohol group as acceptor  
Hydrolases, glycosylases, hydrolyzing N-glycosyl compounds  
Hydrolases, glycosylases, glycosidases, i.e  
Hydrolases, acting on ester bonds, thiolester hydrolases  
Hydrolases, acting on ester bonds, carboxylic ester hydrolases  
Transferases, transferring one-carbon groups, methyltransferases  
Hydrolases, acting on ester bonds, phosphoric monoester hydrolases; Hydrolases, acting on ester bonds, phosphoric monoester hydrolases  
Oxidoreductases, acting on the CH-OH group of donors, with NAD(+) or NADP(+) as acceptor  
Transferases, transferring aldehyde or ketone residues, transketolases and transaldolases  
Hydrolases, acting on ester bonds, phosphoric monoester hydrolases  
Oxidoreductases, acting on NADH or NADPH, with other acceptors  
Transferases, transferring one-carbon groups, methyltransferases  
Oxidoreductases, acting on other nitrogenous compounds as donors, with a cytochrome as acceptor  
Hydrolases, acting on peptide bonds (peptide hydrolases), metalloendopeptidases  
Hydrolases, acting on ester bonds, thiolester hydrolases  
Transferases, transferring one-carbon groups, methyltransferases  
Oxidoreductases, acting on NADH or NADPH, with other acceptors  
Transferases, glycosyltransferases, hexosyltransferases



Transferases, transferring sulfur-containing groups, sulfurtransferases  
Oxidoreductases, acting on the CH-NH group of donors, with oxygen as acceptor  
Transferases, transferring phosphorous-containing groups, phosphotransferases with an alcohol group as acceptor  
Hydrolases, acting on acid anhydrides, in sulfonyl-containing anhydrides  
Hydrolases, acting on peptide bonds (peptide hydrolases), serine endopeptidases  
Hydrolases, acting on peptide bonds (peptide hydrolases), serine endopeptidases  
Transferases, transferring phosphorous-containing groups, phosphotransferases with an alcohol group as acceptor  
Transferases, transferring one-carbon groups, methyltransferases  
Oxidoreductases, acting on the CH-OH group of donors, with NAD(+) or NADP(+) as acceptor  
Hydrolases, acting on peptide bonds (peptide hydrolases), omega peptidases  
Oxidoreductases, acting on the aldehyde or oxo group of donors, with an iron-sulfur protein as acceptor  
Transferases, acyltransferases, transferring groups other than amino-acyl groups  
Transferases, transferring phosphorous-containing groups, transferases for other substituted phosphate groups  
Transferases, transferring phosphorous-containing groups, nucleotidyltransferases  
Hydrolases, acting on ester bonds, phosphoric monoester hydrolases  
Transferases, transferring nitrogenous groups, transaminases (aminotransferases)  
Hydrolases, acting on acid anhydrides, in sulfonyl-containing anhydrides  
Hydrolases, acting on peptide bonds (peptide hydrolases), metalloendopeptidases  
Hydrolases, acting on ester bonds, sulfuric ester hydrolases  
Transferases, transferring phosphorous-containing groups, phosphotransferases with an alcohol group as acceptor  
Lyases, carbon-carbon lyases, aldehyde-lyases  
Oxidoreductases, acting on the aldehyde or oxo group of donors, with NAD(+) or NADP(+) as acceptor  
Oxidoreductases, acting on the CH-OH group of donors, with NAD(+) or NADP(+) as acceptor  
Oxidoreductases, acting on the CH-OH group of donors, with NAD(+) or NADP(+) as acceptor  
Oxidoreductases, acting on the CH-OH group of donors, with NAD(+) or NADP(+) as acceptor  
Transferases, transferring phosphorous-containing groups, phosphotransferases with an alcohol group as acceptor  
Hydrolases, acting on peptide bonds (peptide hydrolases), serine endopeptidases  
Oxidoreductases, acting on the CH-CH group of donors, with NAD(+) or NADP(+) as acceptor  
Oxidoreductases, acting on the CH-OH group of donors, with NAD(+) or NADP(+) as acceptor  
Oxidoreductases, acting on NADH or NADPH, with other acceptors  
Oxidoreductases, acting on the CH-OH group of donors, with a cytochrome as acceptor  
Transferases, transferring sulfur-containing groups, coA-transferases  
Oxidoreductases, acting on the CH-CH group of donors, with other acceptors

Transferases, transferring phosphorous-containing groups, phosphotransferases with an alcohol group as acceptor  
Transferases, transferring nitrogenous groups, transaminases (aminotransferases)  
Transferases, transferring phosphorous-containing groups, transferases for other substituted phosphate groups  
Oxidoreductases, acting on the CH-OH group of donors, with NAD(+) or NADP(+) as acceptor  
Transferases, transferring phosphorous-containing groups, phosphotransferases with an alcohol group as acceptor  
Lyases, carbon-carbon lyases, aldehyde-lyases  
Oxidoreductases, acting on the CH-OH group of donors, with NAD(+) or NADP(+) as acceptor  
Oxidoreductases, acting on the CH-OH group of donors, with NAD(+) or NADP(+) as acceptor  
Oxidoreductases, miscellaneous (requires further characterization), miscellaneous (requires further characterization)  
Lyases, carbon-carbon lyases, oxo-acid-lyases  
Hydrolases, acting on peptide bonds (peptide hydrolases), metalloendopeptidases  
Hydrolases, acting on acid anhydrides, in sulfonyl-containing anhydrides  
Transferases, acyltransferases, transferring groups other than amino-acyl groups  
Transferases, acyltransferases, transferring groups other than amino-acyl groups  
Transferases, acyltransferases, transferring groups other than amino-acyl groups  
Transferases, transferring phosphorous-containing groups, phosphotransferases with an alcohol group as acceptor  
Lyases, carbon-carbon lyases, aldehyde-lyases  
Hydrolases, glycosylases, hydrolyzing N-glycosyl compounds

Transferases, transferring phosphorous-containing groups, phosphotransferases with an alcohol group as acceptor  
Hydrolases, glycosylases, glycosidases, i.e  
Oxidoreductases, acting on the CH-CH group of donors, with oxygen as acceptor  
Transferases, transferring phosphorous-containing groups, phosphotransferases with an alcohol group as acceptor  
Hydrolases, glycosylases, hydrolyzing N-glycosyl compounds  
Transferases, transferring phosphorous-containing groups, phosphotransferases with an alcohol group as acceptor  
Oxidoreductases, acting on the CH-OH group of donors, with NAD(+) or NADP(+) as acceptor  
Lyases, carbon-carbon lyases, aldehyde-lyases  
Transferases, glycosyltransferases, hexosyltransferases  
Transferases, transferring one-carbon groups, hydroxymethyl-, formyl- and related transferases  
Ligases, forming carbon-sulfur bonds, acid--thiol ligases  
Transferases, transferring nitrogenous groups, transaminases (aminotransferases)  
Isomerases, intramolecular oxidoreductases, transposing C=C bonds  
Isomerases, racemases and epimerases, acting on other compounds  
Isomerases, racemases and epimerases, acting on other compounds  
Transferases, transferring nitrogenous groups, transaminases (aminotransferases)  
Transferases, glycosyltransferases, pentosyltransferases  
Oxidoreductases, acting on the CH-OH group of donors, with NAD(+) or NADP(+) as acceptor  
Oxidoreductases, acting on the CH-OH group of donors, with NAD(+) or NADP(+) as acceptor  
Transferases, acyltransferases, transferring groups other than amino-acyl groups  
Hydrolases, acting on acid anhydrides, in phosphorous-containing anhydrides  
Oxidoreductases, acting on the CH-NH(2) group of donors, with NAD(+) or NADP(+) as acceptor  
Oxidoreductases, acting on NADH or NADPH, with a quinone or similar compound as acceptor  
Oxidoreductases, acting on NADH or NADPH, with a quinone or similar compound as acceptor  
Oxidoreductases, acting on NADH or NADPH, with a quinone or similar compound as acceptor  
Hydrolases, acting on peptide bonds (peptide hydrolases), metalloendopeptidases  
Oxidoreductases, acting on phosphorus or arsenic in donors, acting on phosphorus or arsenic in donors  
Transferases, transferring one-carbon groups, methyltransferases  
Oxidoreductases, miscellaneous (requires further characterization), miscellaneous (requires further characterizatic  
Oxidoreductases, miscellaneous (requires further characterization), miscellaneous (requires further characterizatic  
Oxidoreductases, acting on the CH-OH group of donors, with NAD(+) or NADP(+) as acceptor;Oxidoreductases, a  
Oxidoreductases, acting on the CH-OH group of donors, with NAD(+) or NADP(+) as acceptor  
Transferases, transferring phosphorous-containing groups, phosphotransferases with an alcohol group as acceptor  
Hydrolases, acting on carbon-nitrogen bonds, other than peptide bonds, in cyclic amidines  
Transferases, transferring one-carbon groups, methyltransferases  
Oxidoreductases, acting on phosphorus or arsenic in donors, acting on phosphorus or arsenic in donors  
Isomerases, intramolecular transferases (mutases), phosphotransferases (phosphomutases)  
Oxidoreductases, acting on iron-sulfur proteins as donors, with NAD(+) or NADP(+) as acceptor  
Oxidoreductases, acting on the CH-OH group of donors, with NAD(+) or NADP(+) as acceptor  
Lyases, carbon-carbon lyases, aldehyde-lyases  
Isomerases, intramolecular oxidoreductases, interconverting aldoses and ketoses  
Oxidoreductases, acting on the CH-OH group of donors, with NAD(+) or NADP(+) as acceptor  
Transferases, transferring phosphorous-containing groups, phosphotransferases with an alcohol group as acceptor  
Transferases, transferring one-carbon groups, methyltransferases  
Lyases, carbon-oxygen lyases, hydro-lyases  
Hydrolases, acting on carbon-nitrogen bonds, other than peptide bonds, in cyclic amidines  
Oxidoreductases, acting on the CH-OH group of donors, with NAD(+) or NADP(+) as acceptor  
Oxidoreductases, acting on the aldehyde or oxo group of donors, with NAD(+) or NADP(+) as acceptor;Transferas  
Isomerases, racemases and epimerases, acting on amino acids and derivatives  
Transferases, transferring one-carbon groups, carboxyl- and carbamoyltransferases  
Hydrolases, acting on peptide bonds (peptide hydrolases), dipeptidases  
Hydrolases, acting on carbon-nitrogen bonds, other than peptide bonds, in cyclic amides

Transferases, transferring phosphorous-containing groups, phosphotransferases with a carboxyl group as acceptor  
Oxidoreductases, acting on the CH-NH(2) group of donors, with NAD(+) or NADP(+) as acceptor  
Oxidoreductases, acting on the CH-NH(2) group of donors, with NAD(+) or NADP(+) as acceptor  
Oxidoreductases, acting on the CH-OH group of donors, with NAD(+) or NADP(+) as acceptor  
Oxidoreductases, miscellaneous (requires further characterization), miscellaneous (requires further characterization)  
Ligases, forming carbon-nitrogen bonds, cyclo-ligases  
Isomerases, intramolecular transferases (mutases), transferring other groups  
Hydrolases, acting on ester bonds, thiolester hydrolases  
Oxidoreductases, acting on the aldehyde or oxo group of donors, with NAD(+) or NADP(+) as acceptor  
Hydrolases, acting on ester bonds, phosphoric monoester hydrolases  
Hydrolases, acting on peptide bonds (peptide hydrolases), metalloendopeptidases  
Hydrolases, acting on acid anhydrides, in phosphorous-containing anhydrides  
Oxidoreductases, acting on the CH-OH group of donors, with a cytochrome as acceptor  
Hydrolases, acting on ester bonds, carboxylic ester hydrolases  
Oxidoreductases, acting on the CH-OH group of donors, with NAD(+) or NADP(+) as acceptor;Oxidoreductases, acting on the CH-OH group of donors, with NAD(+) or NADP(+) as acceptor

Ligases, forming carbon-nitrogen bonds, acid--ammonia (or amide) ligases (amide synthases)  
Oxidoreductases, acting on single donors with incorporation of molecular oxygen, with incorporation of two atoms  
Transferases, transferring phosphorous-containing groups, phosphotransferases with an alcohol group as acceptor  
Hydrolases, acting on acid anhydrides, in phosphorous-containing anhydrides  
Transferases, acyltransferases, transferring groups other than amino-acyl groups  
Transferases, transferring phosphorous-containing groups, phosphotransferases with a carboxyl group as acceptor  
Lyases, carbon-carbon lyases, aldehyde-lyases  
Hydrolases, acting on carbon-nitrogen bonds, other than peptide bonds, in other compounds  
Transferases, transferring one-carbon groups, methyltransferases  
Oxidoreductases, miscellaneous (requires further characterization), miscellaneous (requires further characterization)

Hydrolases, acting on peptide bonds (peptide hydrolases), serine endopeptidases  
Hydrolases, acting on peptide bonds (peptide hydrolases), serine endopeptidases  
Hydrolases, acting on acid anhydrides, in sulfonyl-containing anhydrides  
Lyases, carbon-carbon lyases, oxo-acid-lyases  
Transferases, transferring phosphorous-containing groups, phosphotransferases with an alcohol group as acceptor  
Hydrolases, acting on ester bonds, phosphoric triester hydrolases  
Isomerases, intramolecular transferases (mutases), phosphotransferases (phosphomutases)  
Transferases, glycosyltransferases, hexosyltransferases;Hydrolases, glycosylases, glycosidases, i.e  
Oxidoreductases, acting on other nitrogenous compounds as donors, with a cytochrome as acceptor  
Oxidoreductases, acting on the CH-OH group of donors, with NAD(+) or NADP(+) as acceptor  
Lyases, carbon-carbon lyases, carboxy-lyases  
Isomerases, racemases and epimerases, acting on carbohydrates and derivatives  
Transferases, transferring one-carbon groups, methyltransferases  
Transferases, transferring sulfur-containing groups, sulfurtransferases

Hydrolases, glycosylases, glycosidases, i.e  
Hydrolases, acting on ester bonds, sulfuric ester hydrolases  
Transferases, transferring phosphorous-containing groups, phosphotransferases with an alcohol group as acceptor  
Hydrolases, acting on halide bonds, in C-halide compounds  
Hydrolases, acting on carbon-nitrogen bonds, other than peptide bonds, in other compounds  
Transferases, transferring phosphorous-containing groups, transferases for other substituted phosphate groups  
Oxidoreductases, acting on the CH-OH group of donors, with NAD(+) or NADP(+) as acceptor

Transferases, glycosyltransferases, hexosyltransferases  
Hydrolases, acting on ester bonds, phosphoric monoester hydrolases  
Transferases, transferring one-carbon groups, methyltransferases  
Transferases, acyltransferases, transferring groups other than amino-acyl groups  
Hydrolases, glycosylases, glycosidases, i.e  
Isomerases, racemases and epimerases, acting on carbohydrates and derivatives  
Lyases, carbon-carbon lyases, aldehyde-lyases  
Oxidoreductases, acting on the CH-OH group of donors, with NAD(+) or NADP(+) as acceptor  
Transferases, transferring phosphorous-containing groups, phosphotransferases with an alcohol group as acceptor  
Transferases, transferring phosphorous-containing groups, phosphotransferases with an alcohol group as acceptor  
Hydrolases, acting on peptide bonds (peptide hydrolases), threonine endopeptidases  
Transferases, transferring aldehyde or ketone residues, transketolases and transaldolases  
Transferases, transferring phosphorous-containing groups, phosphotransferases with an alcohol group as acceptor  
Isomerases, racemases and epimerases, acting on carbohydrates and derivatives  
Transferases, transferring one-carbon groups, methyltransferases  
Ligases, forming carbon-nitrogen bonds, acid--ammonia (or amide) ligases (amide synthases)  
Oxidoreductases, acting on the CH-CH group of donors, with other acceptors  
Lyases, carbon-carbon lyases, carboxy-lyases  
Isomerases, racemases and epimerases, acting on carbohydrates and derivatives  
Ligases, forming carbon-nitrogen bonds, acid--D-amino-acid ligases (peptide synthases)  
Oxidoreductases, acting on the CH-OH group of donors, with NAD(+) or NADP(+) as acceptor  
Lyases, carbon-oxygen lyases, hydro-lyases  
Isomerases, racemases and epimerases, acting on carbohydrates and derivatives  
Transferases, transferring nitrogenous groups, transaminases (aminotransferases)  
Hydrolases, acting on ester bonds, phosphoric monoester hydrolases

Ligases, forming carbon-nitrogen bonds, other carbon--nitrogen ligases  
Transferases, transferring one-carbon groups, methyltransferases

| Component of EFICAz responsible for the prediction |         |           |          |                      |
|----------------------------------------------------|---------|-----------|----------|----------------------|
| SIT                                                | PROSITE | CHIEF-FDR | PFAM-FDR | Number of components |
| SIT                                                | PROSITE |           | PFAM-FDR | 3                    |
|                                                    |         | CHIEF-FDR |          | 1                    |
| SIT                                                | PROSITE |           |          | 2                    |
| SIT                                                | PROSITE | CHIEF-FDR | PFAM-FDR | 4                    |
|                                                    |         |           | PFAM-FDR | 1                    |
| SIT                                                | PROSITE | CHIEF-FDR | PFAM-FDR | 4                    |
|                                                    |         | CHIEF-FDR | PFAM-FDR | 2                    |
|                                                    |         |           | PFAM-FDR | 1                    |
|                                                    |         | CHIEF-FDR |          | 1                    |
|                                                    |         | CHIEF-FDR |          | 1                    |
| SIT                                                | PROSITE | CHIEF-FDR | PFAM-FDR | 4                    |
| SIT                                                |         |           |          | 1                    |
|                                                    |         | CHIEF-FDR |          | 1                    |
| n)                                                 |         | CHIEF-FDR | PFAM-FDR | 2                    |
| of oxygen                                          |         |           | PFAM-FDR | 1                    |
|                                                    |         | CHIEF-FDR |          | 1                    |
| r                                                  |         | CHIEF-FDR | PFAM-FDR | 2                    |
|                                                    |         | CHIEF-FDR |          | 1                    |
|                                                    |         |           | PFAM-FDR | 1                    |
| SIT                                                |         |           |          | 1                    |
| SIT                                                |         | CHIEF-FDR |          | 2                    |
| SIT                                                |         | CHIEF-FDR | PFAM-FDR | 3                    |
|                                                    |         | CHIEF-FDR | PFAM-FDR | 2                    |
| SIT                                                | PROSITE |           |          | 2                    |
|                                                    |         | CHIEF-FDR |          | 1                    |
|                                                    |         |           | PFAM-FDR | 1                    |
| SIT                                                |         |           | PFAM-FDR | 2                    |
| SIT                                                |         |           |          | 1                    |
|                                                    |         | CHIEF-FDR |          | 1                    |
|                                                    |         |           | PFAM-FDR | 1                    |
| SIT                                                | PROSITE |           | PFAM-FDR | 3                    |
| n)                                                 |         |           | PFAM-FDR | 1                    |
| r                                                  |         | CHIEF-FDR |          | 1                    |
| SIT                                                | PROSITE | CHIEF-FDR | PFAM-FDR | 4                    |
|                                                    |         |           | PFAM-FDR | 1                    |
| SIT                                                | PROSITE |           |          | 2                    |
| SIT                                                | PROSITE | CHIEF-FDR | PFAM-FDR | 4                    |
|                                                    |         | CHIEF-FDR |          | 1                    |
| ric diester hydrolases                             |         |           | PFAM-FDR | 1                    |
| SIT                                                |         | CHIEF-FDR | PFAM-FDR | 3                    |
| SIT                                                |         |           |          | 1                    |
|                                                    |         |           | PFAM-FDR | 1                    |
|                                                    |         |           | PFAM-FDR | 1                    |
| SIT                                                | PROSITE |           |          | 2                    |
| SIT                                                |         |           |          | 1                    |
|                                                    |         |           | PFAM-FDR | 1                    |
|                                                    |         | CHIEF-FDR |          | 1                    |
|                                                    |         |           | PFAM-FDR | 1                    |
|                                                    |         |           | PFAM-FDR | 1                    |
|                                                    |         | CHIEF-FDR |          | 1                    |

|     |           |           |            |
|-----|-----------|-----------|------------|
|     |           | PFAM-FDR  | 1          |
| SIT | CHIEF-FDR |           | 2          |
| SIT | CHIEF-FDR | PFAM-FDR  | 3          |
|     | CHIEF-FDR |           | 1          |
|     |           | PFAM-FDR  | 1          |
|     | CHIEF-FDR | PFAM-FDR  | 2          |
| or  | CHIEF-FDR |           | 1          |
|     | CHIEF-FDR |           | 1          |
|     | CHIEF-FDR |           | 1          |
|     |           | PFAM-FDR  | 1          |
|     | CHIEF-FDR |           | 1          |
| SIT | PROSITE   | CHIEF-FDR | PFAM-FDR 4 |
|     |           |           | PFAM-FDR 1 |
| SIT | PROSITE   | CHIEF-FDR | PFAM-FDR 4 |
|     |           | CHIEF-FDR | PFAM-FDR 2 |
|     |           | CHIEF-FDR | 1          |
|     |           | CHIEF-FDR | 1          |
|     |           | CHIEF-FDR | 1          |
|     |           | CHIEF-FDR | PFAM-FDR 2 |
| or  |           | CHIEF-FDR | PFAM-FDR 2 |
|     |           | CHIEF-FDR | PFAM-FDR 2 |
|     |           | CHIEF-FDR | 1          |
|     |           | CHIEF-FDR | 1          |
| SIT |           | CHIEF-FDR | PFAM-FDR 3 |
|     |           | CHIEF-FDR | 1          |
| or  |           | CHIEF-FDR | 1          |
|     |           |           | PFAM-FDR 1 |
|     |           |           | PFAM-FDR 1 |
|     |           | CHIEF-FDR | 1          |
| SIT |           | CHIEF-FDR | 2          |
|     |           | CHIEF-FDR | 1          |
|     |           |           | PFAM-FDR 1 |
| SIT | PROSITE   | CHIEF-FDR | PFAM-FDR 4 |
|     |           | CHIEF-FDR | 1          |
| SIT |           | CHIEF-FDR | 2          |
| SIT |           |           | 1          |
|     |           |           | PFAM-FDR 1 |
|     |           | CHIEF-FDR | 1          |
| SIT | PROSITE   | CHIEF-FDR | PFAM-FDR 4 |
| SIT |           | CHIEF-FDR | PFAM-FDR 3 |
|     |           | CHIEF-FDR | 1          |
|     |           | CHIEF-FDR | 1          |
| on) |           | CHIEF-FDR | 1          |
| SIT |           |           | 1          |
|     |           |           | PFAM-FDR 1 |
|     |           | CHIEF-FDR | 1          |
|     |           | CHIEF-FDR | 1          |
|     |           | CHIEF-FDR | 1          |
| SIT |           | CHIEF-FDR | 2          |
| or  |           |           | PFAM-FDR 1 |
| SIT | PROSITE   | CHIEF-FDR | PFAM-FDR 4 |
|     |           | CHIEF-FDR | PFAM-FDR 2 |

|                                  |           |          |   |
|----------------------------------|-----------|----------|---|
| SIT PROSITE                      | CHIEF-FDR | PFAM-FDR | 4 |
|                                  | CHIEF-FDR | PFAM-FDR | 2 |
| SIT                              |           |          | 1 |
| SIT PROSITE                      | CHIEF-FDR | PFAM-FDR | 4 |
| SIT PROSITE                      |           | PFAM-FDR | 3 |
| SIT PROSITE                      | CHIEF-FDR | PFAM-FDR | 4 |
| SIT                              | CHIEF-FDR | PFAM-FDR | 3 |
| SIT                              |           |          | 1 |
|                                  | CHIEF-FDR |          | 1 |
|                                  | CHIEF-FDR |          | 1 |
|                                  |           | PFAM-FDR | 1 |
| SIT                              | CHIEF-FDR |          | 2 |
|                                  | CHIEF-FDR |          | 1 |
|                                  | CHIEF-FDR | PFAM-FDR | 2 |
|                                  | CHIEF-FDR |          | 1 |
|                                  | CHIEF-FDR |          | 1 |
| SIT PROSITE                      | CHIEF-FDR | PFAM-FDR | 4 |
| SIT                              | CHIEF-FDR |          | 2 |
| SIT                              | CHIEF-FDR | PFAM-FDR | 3 |
| SIT                              | CHIEF-FDR | PFAM-FDR | 3 |
|                                  | CHIEF-FDR |          | 1 |
| SIT                              | CHIEF-FDR |          | 2 |
|                                  | CHIEF-FDR |          | 1 |
|                                  | CHIEF-FDR |          | 1 |
|                                  | CHIEF-FDR |          | 1 |
|                                  |           | PFAM-FDR | 1 |
| SIT                              | CHIEF-FDR | PFAM-FDR | 3 |
|                                  |           | PFAM-FDR | 1 |
| SIT                              | CHIEF-FDR |          | 2 |
| SIT                              |           |          | 1 |
| SIT                              | CHIEF-FDR |          | 2 |
|                                  | CHIEF-FDR |          | 1 |
| or                               | CHIEF-FDR |          | 1 |
|                                  | CHIEF-FDR | PFAM-FDR | 2 |
|                                  |           | PFAM-FDR | 1 |
|                                  | CHIEF-FDR |          | 1 |
|                                  | CHIEF-FDR |          | 1 |
| SIT                              |           |          | 1 |
| SIT                              |           |          | 1 |
|                                  |           | PFAM-FDR | 1 |
| SIT                              |           |          | 1 |
| SIT                              | CHIEF-FDR |          | 2 |
| or                               | CHIEF-FDR | PFAM-FDR | 2 |
| SIT PROSITE                      |           |          | 2 |
| SIT                              | CHIEF-FDR | PFAM-FDR | 3 |
|                                  |           | PFAM-FDR | 1 |
|                                  | CHIEF-FDR |          | 1 |
| ies, acyltransferases, transferi |           | PFAM-FDR | 1 |
| SIT PROSITE                      |           | PFAM-FDR | 3 |
|                                  | CHIEF-FDR | PFAM-FDR | 2 |
|                                  |           | PFAM-FDR | 1 |
|                                  | CHIEF-FDR |          | 1 |

|                   |           |   |
|-------------------|-----------|---|
| SIT               |           | 1 |
|                   | PFAM-FDR  | 1 |
| SIT               | CHIEF-FDR | 3 |
|                   | CHIEF-FDR | 1 |
| n)                | PFAM-FDR  | 1 |
|                   | CHIEF-FDR | 2 |
| SIT PROSITE       | CHIEF-FDR | 4 |
|                   | CHIEF-FDR | 1 |
| SIT               | CHIEF-FDR | 3 |
|                   | PFAM-FDR  | 1 |
|                   | PFAM-FDR  | 1 |
| SIT               |           | 1 |
|                   | CHIEF-FDR | 1 |
|                   | CHIEF-FDR | 2 |
| acting on the CH- | CHIEF-FDR | 1 |
| SIT               | CHIEF-FDR | 3 |
|                   | PFAM-FDR  | 1 |
| SIT               | CHIEF-FDR | 3 |
| SIT               | CHIEF-FDR | 3 |
|                   | CHIEF-FDR | 1 |
| of oxygen         |           | 1 |
| or;Transferases,  | CHIEF-FDR | 2 |
|                   | PFAM-FDR  | 1 |
| SIT               | CHIEF-FDR | 3 |
| SIT PROSITE       | CHIEF-FDR | 4 |
| SIT PROSITE       | CHIEF-FDR | 4 |
| SIT PROSITE       |           | 2 |
|                   | CHIEF-FDR | 1 |
| n)                |           | 1 |
| SIT PROSITE       | CHIEF-FDR | 4 |
|                   | PFAM-FDR  | 1 |
|                   | PFAM-FDR  | 1 |
|                   | CHIEF-FDR | 1 |
| SIT               | CHIEF-FDR | 3 |
| SIT PROSITE       | CHIEF-FDR | 4 |
| SIT PROSITE       |           | 2 |
|                   | CHIEF-FDR | 2 |
|                   | CHIEF-FDR | 1 |
| SIT               |           | 2 |
|                   | CHIEF-FDR | 2 |
|                   | PFAM-FDR  | 1 |
| SIT               | CHIEF-FDR | 3 |
|                   | PFAM-FDR  | 1 |
|                   | CHIEF-FDR | 1 |
| SIT PROSITE       | CHIEF-FDR | 3 |
|                   | CHIEF-FDR | 2 |
|                   | PFAM-FDR  | 1 |
| SIT               | CHIEF-FDR | 2 |
|                   | PFAM-FDR  | 1 |
| SIT PROSITE       |           | 2 |
|                   | CHIEF-FDR | 2 |
|                   | CHIEF-FDR | 2 |



|             |           |          |   |
|-------------|-----------|----------|---|
|             | CHIEF-FDR | PFAM-FDR | 2 |
|             |           | PFAM-FDR | 1 |
|             |           | PFAM-FDR | 1 |
|             | CHIEF-FDR | PFAM-FDR | 2 |
| SIT         | CHIEF-FDR |          | 2 |
| SIT         | CHIEF-FDR |          | 2 |
| or          | CHIEF-FDR |          | 1 |
|             | CHIEF-FDR | PFAM-FDR | 2 |
| SIT         |           |          | 1 |
| or          | CHIEF-FDR |          | 1 |
| SIT PROSITE | CHIEF-FDR | PFAM-FDR | 4 |
|             |           | PFAM-FDR | 1 |
|             | CHIEF-FDR |          | 1 |
| SIT PROSITE |           |          | 2 |
|             |           | PFAM-FDR | 1 |
| SIT         | CHIEF-FDR | PFAM-FDR | 3 |
| SIT         | CHIEF-FDR | PFAM-FDR | 3 |
|             | CHIEF-FDR |          | 1 |
| SIT PROSITE | CHIEF-FDR | PFAM-FDR | 4 |
| SIT PROSITE | CHIEF-FDR | PFAM-FDR | 4 |
|             | CHIEF-FDR |          | 1 |
|             |           | PFAM-FDR | 1 |
| SIT PROSITE | CHIEF-FDR | PFAM-FDR | 4 |
|             |           | PFAM-FDR | 1 |
|             |           | PFAM-FDR | 1 |

## KEGG annotation

hypothetical 32.6 kD protein in *lytB-dapB* intergenic region  
probable crotonobetaine/carnitine-CoA ligase [EC:6.3.2.-]  
probable carnitine operon oxidoreductase *caiA* [EC:1.3.99.-]  
dimethyladenosine transferase [EC:2.1.1.-]  
*ampD* protein  
putative carbonic anhydrase [EC:4.2.1.1]  
putative tRNA synthetase  
protease do precursor [EC:3.4.21.-]  
UDP-3-O-[3-hydroxymyristoyl] glucosamine N-acyltransferase (*firA* protein) (rifampicin resistance protein) [EC:2.3.1.1.-]  
D-glycero-D-manno-heptose 1,7-bisphosphate phosphatase [EC:3.1.1.-]  
hypothetical 69.4 kD protein in *perR-argF* intergenic region  
carbamate kinase [EC:2.7.2.2]  
hypothetical zinc-type alcohol dehydrogenase-like protein in *betT-prpR* intergenic region  
3-(3-hydroxy-phenyl)propionate hydroxylase [EC:1.14.13.-]  
2,3-dihydroxyphenylpropionate 1,2-dioxygenase [EC:1.13.11.-]  
hypothetical 44.7 kD protein in *adhC-taua* intergenic region  
putative nitrate transport permease protein  
hypothetical oxidoreductase in *pgpA-ispA* intergenic region  
cytochrome o ubiquinol oxidase operon protein *cyoD*  
cytochrome o ubiquinol oxidase subunit III [EC:1.10.3.-]  
cytochrome o ubiquinol oxidase subunit I [EC:1.10.3.-]  
acyl-CoA thioesterase II [EC:3.1.2.-]  
hypothetical 14.4 kD protein in *tesB-hha* intergenic region  
acetyl esterase [EC:3.1.1.-]  
putative oxidoreductase [EC:1.-.-.-]  
hypothetical 41.7 kD protein in *nfnB-entD* intergenic region  
hypothetical oxidoreductase in *cstA-ahpC* intergenic region [EC:1.1.-.-]  
alkyl hydroperoxide reductase *f52a* protein [EC:1.6.4.-]  
hypothetical zinc-type alcohol dehydrogenase-like protein in *ahpF-rnk* intergenic region  
lipoate-protein ligase B (lipoate biosynthesis protein B) [EC:6.-.-.-]  
hypothetical 33.8 kD protein in *leuS-gltL* intergenic region  
2-octaprenyl-3-methyl-6-methoxy-1,4-benzoquinol hydroxylase [EC:1.14.13.-]  
N-acetylglucosamine repressor  
endonuclease VIII [EC:3.2.-.-]  
putative alpha-mannosidase  
hypothetical 15.6 kD protein in *cydB-tolQ* intergenic region  
putative pectinesterase  
biotin synthesis protein *bioC*  
hypothetical 28.8 kD protein in *moaE-rhIE* intergenic region  
putative malate dehydrogenase, archaea type [EC:1.1.1.37]  
putative transaldolase [EC:4.1.2.-]  
hypothetical 22.4 kD protein in *deoR-cmr* intergenic region  
oxygen-insensitive NADPH nitroreductase [EC:1.-.-.-]  
hypothetical RNA methyltransferase in *potI-artJ* intergenic region [EC:2.1.1.-]  
anaerobic dimethyl sulfoxide reductase chain A precursor (DMSO reductase) [EC:1.8.99.-]  
putative metalloprotease [EC:3.4.24.-]  
hypothetical 23.8 kD protein in *mukB-aspC* intergenic region  
putative oxidoreductase  
putative enzyme  
hypothetical 50.8 kD protein in *phoH-csgG* intergenic region

hypothetical 40.0 kD protein in htrB-dinI intergenic region (ORF39.9)  
putative sarcosine oxidase [EC:1.5.3.1]  
hypothetical 33.0 kD protein in mfd-cobb intergenic region  
spermidine/putrescine transport system ATP-binding protein  
putative phage repressor  
umuD protein [EC:3.4.21.-]  
putative dihydroxyacetone kinase  
hemK protein [EC:2.1.1.-]  
hypothetical oxidoreductase in btuR-sohB intergenic region [EC:1.-.-.-]  
hypothetical 28.5 kD protein in sapA-aldH intergenic region  
pyruvate ferredoxin oxidoreductase [EC:1.2.7.-]  
putative acetyl-CoA acetyltransferase [EC:2.3.1.-]  
hypothetical protein  
putative phosphatidate cytidyltransferase [EC:2.7.7.41]  
hypothetical 49.6 kD protein in maoC-acpD intergenic region  
multi modular. putative transcriptional regulator. also putative ATP-binding component of a transport system  
putative spermidine/putrescine transport system ATP-binding protein  
probable zinc protease pqqL [EC:3.4.99.-]  
putative sulfatase [EC:3.1.6.-]  
hypothetical sugar kinase in hipB-uxaB intergenic region  
hypothetical 31.9 kD protein in hipB-uxaB intergenic region [EC:4.2.1.-]  
putative aldehyde dehydrogenase [EC:1.2.1.-]  
probable oxidoreductase in dcp-nohA intergenic region [EC:1.-.-.-]  
putative oxidoreductase  
starvation sensing protein rspB [EC:1.1.1.-]  
MLC protein (making large colonies protein)  
putative protease ydgD precursor [EC:3.4.21.-]  
hypothetical oxidoreductase in pntA-rstA intergenic region [EC:1.-.-.-]  
hypothetical protein  
N-ethylmaleimide reductase (N-ethylmaleimide reducing enzyme) [EC:1.-.-.-]  
hypothetical 113.2 kD protein in lpp-aroD intergenic region  
hypothetical 56.2 kD protein in aroD-ppsA intergenic region  
putative oxidoreductase  
vitamin B12 transport system substrate-binding protein  
pts system, cellobiose-specific IIC component (EIIC-Cel) (cellobiose-permease IIC component) (phosphotransferase)  
succinylornithine transaminase (succinylornithine aminotransferase) (carbon starvation protein C) [EC:2.6.1.-]  
putative cytochrome oxidase  
probable oxidoreductase  
putative kinase  
putative aldolase  
hypothetical zinc-type alcohol dehydrogenase-like protein in ansA-gapA intergenic region  
putative an aldehyde reductase  
putative dioxygenase alpha subunit yeaw [EC:1.14.1.-]  
para-aminobenzoate synthase component I (adc synthase) [EC:4.1.3.-]  
probable protease htpX (heat shock protein htpX) [EC:3.4.24.-]  
putative polar amino acid transport system ATP-binding protein  
putative lipopolysaccharide biosynthesis O-acetyl transferase WbbJ [EC:2.3.1.-]  
putative colanic acid biosynthesis acetyltransferase wcaF [EC:2.3.1.-]  
putative colanic acid biosynthesis acetyltransferase wcaB [EC:2.3.1.-]  
hypothetical 32.0 kD protein in ogrK-gatr intergenic region  
tagatose-bisphosphate aldolase gatY [EC:4.1.2.-]  
hypothetical protein

putative kinase  
putative autolytic lysozyme  
hypothetical 45.3 kD protein in cdd-mglC intergenic region  
hypothetical 39.7 kD protein in nfo-fruA intergenic region  
hypothetical 33.7 kD protein in nfo-fruA intergenic region  
hypothetical 33.6 kD protein in nfo-fruA intergenic region  
hypothetical 54.0 kD protein in fruK-bcr intergenic region  
hypothetical protein  
Putative glycosyl transferase [EC:2.-.-.-]  
putative transformylase  
elaA protein  
putative aspartate aminotransferase [EC:2.6.1.1]  
putative regulator  
hypothetical 43.3 kD protein in evgS-glK intergenic region  
putative enzyme  
N-succinylidiaminopimelate aminotransferase [EC:2.6.1.17]  
xanthosine phosphorylase [EC:2.4.2.-]  
oxidoreductase ucpA [EC:1.-.-.-]  
ethanolamine utilization protein eutG  
ethanolamine utilization protein eutI  
hypothetical 21.7 kD protein in tktB-narQ intergenic region  
putative oxidoreductase, Fe-S subunit  
hydrogenase-4 component B [EC:1.-.-.-]  
hydrogenase-4 component D [EC:1.-.-.-]  
hydrogenase-4 component F [EC:1.-.-.-]  
hypothetical protein  
putative oxidoreductase  
putative ATP synthase beta subunit [EC:2.1.1.-]  
digoxigenin alpha subunit [EC:1.14.1.-]  
digoxigenin beta subunit [EC:1.14.1.-]  
2,3-dihydroxy-2,3-dihydrophenylpropionate dehydrogenase [EC:1.3.1.-]  
hypothetical zinc-type alcohol dehydrogenase-like protein in csiE-glyA intergenic region  
hypothetical 44.8 kD protein in csiE-glyA intergenic region  
hypothetical 20.0 kD protein in purL-dpj intergenic region (ORF178)  
hypothetical tRNA/rRNA methyltransferase yfiF [EC:2.1.1.-]  
hypothetical protein  
hypothetical 20.8 kD protein in gshA-csrA intergenic region  
flavorubredoxin reductase [EC:1.18.1.-]  
putative dehydrogenase [EC:1.1.-.-]  
hypothetical 23.2 kD protein in prpB-rpoS intergenic region  
hypothetical 29.2 kD protein in mutS-rpoS intergenic region (O258)  
putative oxidoreductase [EC:1.-.-.-]  
hypothetical sugar kinase in cysJ-eno intergenic region  
hypothetical RNA methyltransferase in relA-barA intergenic region [EC:2.1.1.-]  
probable glucarate dehydratase 2 (GDH) [EC:4.2.1.40]  
hypothetical 32.6 kD protein in syd-sdaC intergenic region  
hypothetical protein  
2-acylglycerophosphoethanolamine acyltransferase / acyl-acyl carrier protein synthetase (2-acyl-gpe acyltransferase)  
hypothetical 25.2 kD protein in lysR-araE intergenic region  
hypothetical 40.2 kD protein in kdul-lysS intergenic region  
hypothetical 44.8 kD protein in kdul-lysS intergenic region  
hypothetical protein

carbamate kinase [EC:2.7.2.2]  
putative oxidoreductase, Fe-S subunit  
hypothetical 69.7 kD protein in kdul-lysS intergenic region  
hypothetical oxidoreductase in bglA-gcvP intergenic region [EC:1.-.-.-]  
visC protein [EC:1.-.-.-]  
hypothetical 21.1 kD protein in ssr-serA intergenic region (O182)  
methylmalonyl-CoA mutase [EC:5.4.99.2]  
hypothetical 53.8 kD protein in sbm-fba intergenic region (O492)  
D-erythrose 4-phosphate dehydrogenase (E4PDH) [EC:1.2.1.-]  
hypothetical 34.3 kD protein in epd-cmtA intergenic region (ORF 1) (F321)  
putative metalloprotease [EC:3.4.24.-]  
hypothetical 21.0 kD protein in gshB-ansB intergenic region (O197)  
glycolate oxidase subunit glcD [EC:1.1.3.15]  
hypothetical protein  
hypothetical oxidoreductase in hybA-exbD intergenic region [EC:1.-.-.-]  
hypothetical oxidoreductase in metC-sufl intergenic region [EC:1.1.-.-]  
hypothetical protein  
topoisomerase IV subunit [EC:5.99.1.-]  
topoisomerase IV subunit B [EC:5.99.1.-]  
hypothetical 45.0 kD protein in tolC-ribB intergenic region (ORFA) (O386)  
hypothetical 29.9 kD protein in tolC-ribB intergenic region (ORFC) (F271)  
bifunctional D-glycero-beta-D-manno-heptose 7-phosphate kinase/D-glycero-beta-D-manno-heptose 1-phosphate  
hypothetical 48.4 kD protein in glnE-cca intergenic region (ORFXE)  
keto-acid formate acetyltransferase (keto-acid formate-lyase) [EC:2.3.1.54]  
propionate kinase [EC:2.7.2.-]  
tagatose-bisphosphate aldolase agaY [EC:4.1.2.-]  
putative galactosamine-6-phosphate isomerase (galactosamine-6-phosphate deaminase) [EC:5.3.1.-]  
hypothetical 31.3 kD protein in agal-mtr intergenic region (F286)  
hypothetical 37.1 kD protein in sohA-mtr intergenic region (O335)  
octaprenyl-diphosphate synthase (octaprenyl pyrophosphate synthetase) [EC:2.5.1.-]  
protease degQ precursor [EC:3.4.21.-]  
protease degS precursor [EC:3.4.21.-]  
putative polar amino acid transport system ATP-binding protein  
para-aminobenzoate synthase component II [EC:4.1.3.-]  
hypothetical 28.3 kD protein in cysG-trpS intergenic region (O261)  
phosphotriesterase homology protein  
hypothetical 44.6 kD protein in cysG-trpS intergenic region (F408)  
glycogen operon protein glgX [EC:3.2.1.-]  
biotin sulfoxide reductase 1 (bds reductase 1) (bso reductase 1) [EC:1.-.-.-]  
putative malate dehydrogenase, archaea type [EC:1.1.1.37]  
probable hexulose-6-phosphate synthase (HUMPS) (D-arabino 3-hexulose 6-phosphate formaldehyde lyase) [EC:  
probable sugar isomerase sgbE [EC:5.1.3.4]  
hypothetical tRNA/rRNA methyltransferase yibK [EC:2.1.1.-]  
hypothetical 15.6 kD protein in secB-tdh intergenic region  
hypothetical 63.2 kD protein in rph-gmk intergenic region  
putative glycosyl hydrolase  
putative sulfatase [EC:3.1.6.-]  
pts system, arbutin-like IIC component (phosphotransferase enzyme II, C component)  
hypothetical 24.7 kD protein in tnaB-bglB intergenic region  
hypothetical 23.3 kD protein in tnaB-bglB intergenic region  
undecaprenyl-phosphate alpha-N-acetylglucosaminyltransferase [EC:2.4.1.-]  
UDP-N-acetyl-D-mannosaminuronic acid dehydrogenase (UDP-mannaca dehydrogenase) [EC:1.1.1.-]

probable UDP-N-acetyl-D-mannosaminuronic acid transferase (UDP-mannaca transferase) [EC:2.4.1.-]  
hypothetical 27.1 kD protein in xerC-uvrD intergenic region (ORF 238)  
ubiquinone/menaquinone biosynthesis methyltransferase ubiE [EC:2.1.1.-]  
hypothetical 36.3 kD protein in dsbA-polA intergenic region  
putative glycosyl hydrolase  
hypothetical 34 kD protein in glnA-rbn intergenic region (F308)  
hypothetical 32 kD protein in glnA-rbn intergenic region (F292)  
putative dehydrogenase [EC:1.1.-.-]  
hypothetical 31.9 kD protein in glnA-rbn intergenic region (O300)  
putative frv operon regulatory protein  
heat shock protein hsIV [EC:3.4.25.-]  
fructose-6-phosphate aldolase 2 [EC:4.1.2.-]  
pts system, fructose-like-2 IIC component (phosphotransferase enzyme II, C component)  
hypothetical 26.1 kD protein in fdhF-phnP intergenic region (F231)  
hypothetical tRNA/rRNA methyltransferase yjfH [EC:2.1.1.-]  
hypothetical 45.0 kD protein in vacB-aidB intergenic region (O387)  
aidB protein  
probable hexulose-6-phosphate synthase (HUMPS) (D-arabino 3-hexulose 6-phosphate formaldehyde lyase) [EC:  
probable sugar isomerase sgaE [EC:5.1.3.4]  
UDP-N-acetylmuramate: L-alanyl-gamma-D-glutamyl-meso-diaminopimelate ligase [EC:6.3.2.-]  
hypothetical oxidoreductase in pyrL-argI intergenic region [EC:1.-.-.-]  
hypothetical 70.0 kD protein in fecI-fimB intergenic region  
sgcE protein [EC:5.1.3.-]  
hypothetical 53.0 kD protein in iadA-mcrD intergenic region (F470)  
hypothetical 25.3 kD protein in rimI-prfC intergenic region  
hypothetical 31.5 kD protein in osmY-deoC intergenic region (F287)  
lipoate-protein ligase A [EC:6.-.-.-]  
hypothetical tRNA/rRNA methyltransferase lasT [EC:2.1.1.-]

## Swiss-Prot annotation

Hypothetical protein yaaF.  
Probable crotonobetaine/carnitine-CoA ligase (EC 6.3.2.-).  
Crotonobetainyl-CoA dehydrogenase (EC 1.3.99.-) (Crotonobetainyl-CoA reductase).  
Dimethyladenosine transferase (EC 2.1.1.-) (S-adenosylmethionine-6-N', N'-adenosyl(rRNA) dimethyltransferase) (AmpD protein).  
Protein yadF.  
Hypothetical protein yadB.  
Protease do precursor (EC 3.4.21.-).  
UDP-3-O-[3-hydroxymyristoyl] glucosamine N-acyltransferase (EC 2.3.1.-) (FirA protein) (Rifampicin resistance protein).  
Hypothetical protein yaeD.  
Hypothetical protein yagF.  
Carbamate kinase-like protein yahl.  
Zinc-type alcohol dehydrogenase-like protein yahK.  
3-(3-hydroxy-phenyl)propionate hydroxylase (EC 1.14.13.-).  
2,3-dihydroxyphenylpropionate 1,2-dioxygenase (EC 1.13.11.-).  
Hypothetical protein yaiP.  
Hypothetical protein yajF.  
Hypothetical oxidoreductase yajO (EC 1.-.-.-).  
Cytochrome O ubiquinol oxidase protein cyoD (Ubiquinol oxidase chain D).  
Cytochrome O ubiquinol oxidase subunit III (EC 1.10.3.-) (Ubiquinol oxidase chain C).  
Ubiquinol oxidase polypeptide I (EC 1.10.3.-) (Cytochrome O subunit 1) (Oxidase BO(3) subunit 1) (Cytochrome O).  
Acyl-CoA thioesterase II (EC 3.1.2.-) (TEII).  
Hypothetical protein ybaZ.  
Acetyl esterase (EC 3.1.1.-).  
Hypothetical oxidoreductase ybbO (EC 1.-.-.-).  
Hypothetical protein ybdK.  
Hypothetical oxidoreductase ybdH (EC 1.1.-.-).  
Alkyl hydroperoxide reductase subunit F (EC 1.6.4.-) (Alkyl hydroperoxide reductase F52A protein).  
Hypothetical zinc-type alcohol dehydrogenase-like protein ybdR.  
Lipoate-protein ligase B (EC 6.-.-.-) (Lipoate biosynthesis protein B).  
Hypothetical protein ybeK.  
2-octaprenyl-3-methyl-6-methoxy-1,4-benzoquinol hydroxylase (EC 1.14.13.-).  
N-acetylglucosamine repressor.  
Endonuclease VIII (EC 3.2.-.-).  
Hypothetical protein ybgG.  
Protein ybgC.  
Putative lipoprotein ybHC precursor.  
Biotin synthesis protein bioC.  
Hypothetical protein ybhP.  
Hypothetical oxidoreductase ybiC (EC 1.1.1.-).  
Fructose-6-phosphate aldolase 1 (EC 4.1.2.-).  
Hypothetical protein ybjG.  
Oxygen-insensitive NADPH nitroreductase (EC 1.-.-.-) (Modulator of drug activity A).  
Hypothetical RNA methyltransferase ybjF (EC 2.1.1.-).  
Anaerobic dimethyl sulfoxide reductase chain A precursor (EC 1.8.99.-) (DMSO reductase).  
Putative metalloprotease ycaL (EC 3.4.24.-).  
Hypothetical protein ycbL.  
Hypothetical protein ycbY.  
Putative NADH dehydrogenase/NAD(P)H nitroreductase ycdI (EC 1.-.-.-).  
Hypothetical protein ycdQ.

Hypothetical UPF0176 protein yceA (ORF39.9).  
N-methyl-L-tryptophan oxidase (EC 1.5.3.-) (MTOX).  
Hypothetical protein ycfX.  
Spermidine/putrescine transport ATP-binding protein potA.  
Putative lambdaoid prophage e14 repressor protein C2.  
UmuD protein (EC 3.4.21.-) [Contains: UmuD' protein].  
Hypothetical protein ycgT.  
Protein methyltransferase hemK (EC 2.1.1.-) (Protein-glutamine N- methyltransferase hemK) (Protein-(glutamine-N  
Hypothetical oxidoreductase yciK (EC 1.-.-.-).  
Hypothetical protein ycjL.  
Probable pyruvate-flavodoxin oxidoreductase (EC 1.2.7.-).  
Probable beta-ketoadipyl CoA thiolase (EC 2.3.1.-).  
Hypothetical protein ynbA.  
Hypothetical protein ynbB.  
Hypothetical protein ynbD.  
Hypothetical protein ydcR.  
Hypothetical ABC transporter ATP-binding protein ydcT.  
Probable zinc protease pqqL (EC 3.4.99.-).  
Putative sulfatase ydeN precursor (EC 3.1.6.-).  
Hypothetical sugar kinase ydeV.  
Putative aldolase yneB (EC 4.2.1.-).  
Aldehyde-dehydrogenase like protein ynel (EC 1.2.1.-).  
Probable oxidoreductase ydfG (EC 1.-.-.-).  
Hypothetical oxidoreductase ydfI (EC 1.-.-.-).  
Starvation sensing protein rspB (EC 1.1.1.-).  
Mlc protein (Making large colonies protein).  
Putative protease ydgD precursor (EC 3.4.21.-).  
Hypothetical oxidoreductase ydgB (EC 1.-.-.-).  
Hypothetical oxidoreductase ydhF (EC 1.-.-.-).  
N-ethylmaleimide reductase (EC 1.-.-.-) (N-ethylmaleimide reducing enzyme).  
Hypothetical protein ydiJ.  
Hypothetical protein ydiF.  
Hypothetical protein ydiO.  
Vitamin B12 transport periplasmic protein btuE.  
PTS system, N,N'-diacetylchitobiose-specific IIC component (EIIC-Chb) (N,N'-diacetylchitobiose-permease IIC corr  
Succinylornithine transaminase (EC 2.6.1.-) (Succinylornithine aminotransferase) (Carbon starvation protein C).  
Hypothetical protein ynjF.  
Hypothetical oxidoreductase ydjG (EC 1.-.-.-).  
Hypothetical sugar kinase ydjH.  
Hypothetical protein ydjl.  
Hypothetical zinc-type alcohol dehydrogenase-like protein ydjJ.  
Hypothetical protein yeaE.  
Putative dioxygenase alpha subunit yeaW (EC 1.14.1.-).  
Para-aminobenzoate synthase component I (EC 4.1.3.-) (ADC synthase).  
Probable protease htpX (EC 3.4.24.-) (Heat shock protein htpX).  
Hypothetical amino-acid ABC transporter ATP-binding protein yecC.  
Putative lipopolysaccharide biosynthesis O-acetyl transferase wbbJ (EC 2.3.1.-).  
Putative colanic acid biosynthesis acetyltransferase wcaF (EC 2.3.1.-).  
Putative colanic acid biosynthesis acetyltransferase wcaB (EC 2.3.1.-).  
Hypothetical protein yegS.  
Tagatose-1,6-bisphosphate aldolase gatY (EC 4.1.2.-) (TBPA).  
Hypothetical protein yegU.



Hypothetical sugar kinase yegV.  
Hypothetical protein yegX.  
Hypothetical protein yeiA.  
Hypothetical sugar kinase yeil.  
Hypothetical protein yeiK.  
Hypothetical sugar kinase yeiC.  
Hypothetical oxidoreductase yeiQ (EC 1.-.-.-).  
Hypothetical protein yfaU.  
Glycosyl transferase arnC (EC 2.-.-.-) (Ara4N transferase) (Polymixin resistance protein pmrF).  
Hypothetical protein yfbG.  
Protein elaA.  
Probable aminotransferase yfbQ (EC 2.6.1.-).  
Putative Nudix hydrolase yfcD (EC 3.6.-.-).  
Hypothetical protein yfdE.  
Hypothetical protein yfdW.  
Hypothetical aminotransferase yfdZ (EC 2.6.1.-).  
Xanthosine phosphorylase (EC 2.4.2.-).  
Oxidoreductase ucpA (EC 1.-.-.-).  
Ethanolamine utilization protein eutG.  
Ethanolamine utilization protein eutD.  
Hypothetical protein yffH.  
AegA protein.  
Hydrogenase-4 component B (EC 1.-.-.-).  
Hydrogenase-4 component D (EC 1.-.-.-).  
Hydrogenase-4 component F (EC 1.-.-.-).  
Hypothetical protein yfgC precursor.  
Protein yfgD.  
Hypothetical tRNA/rRNA methyltransferase yfhQ (EC 2.1.1.-).  
3-phenylpropionate dioxygenase alpha subunit (EC 1.14.1.-) (Digoxigenin alpha subunit).  
3-phenylpropionate dioxygenase beta subunit (EC 1.14.1.-) (Digoxigenin beta subunit).  
2,3-dihydroxy-2,3-dihydro-phenylpropionate dehydrogenase (EC 1.3.1.-).  
Hypothetical zinc-type alcohol dehydrogenase-like protein yphC.  
Hypothetical protein yphH.  
Hypothetical protein yfhC.  
Hypothetical tRNA/rRNA methyltransferase yfiF (EC 2.1.1.-).  
Putative arsenate reductase (EC 1.20.4.1) (Arsenical pump modifier) (Fragment).  
Hypothetical protein yqaB.  
Nitric oxide reductase FIRd-NAD(+) reductase (EC 1.18.1.-) (Flavorubredoxin reductase) (FIRd-reductase) (FlavoR)  
Hypothetical oxidoreductase ygbJ (EC 1.1.-.-).  
Hypothetical aldolase class II protein ygbL.  
Hypothetical protein ygbM.  
Hypothetical oxidoreductase ygcW (EC 1.-.-.-).  
Hypothetical sugar kinase ygcE.  
23S rRNA (Uracil-5-)-methyltransferase rumA (EC 2.1.1.-) (23S rRNA(M- 5-U1939)-methyltransferase).  
Glucarate dehydratase related protein (EC 4.2.1.-) (GDH-RP) (GlucDRP).  
Hypothetical protein yqcD.  
Tas protein.  
AAS bifunctional protein [Includes: 2-acylglycerophosphoethanolamine acyltransferase (2-acyl-GPE acyltransferas  
Hypothetical protein ygeA.  
Hypothetical protein ygeW.  
Hypothetical protein ygeY.  
Hypothetical hydrolase ygeZ (EC 3.-.-.-).

Carbamate kinase-like protein yqeA.  
Hypothetical protein ygfK.  
Hypothetical protein ygfT.  
Hypothetical oxidoreductase ygfF (EC 1.-.-.-).  
Protein visC (EC 1.-.-.-).  
Hypothetical protein ygfA.  
Sbm protein.  
Hypothetical protein ygfH.  
D-erythrose 4-phosphate dehydrogenase (EC 1.2.1.-) (E4PDH).  
Hypothetical protein yggF.  
Putative metalloprotease yggG (EC 3.4.24.-).  
HAM1 protein homolog.  
Glycolate oxidase subunit glcD.

Hypothetical oxidoreductase yghA (EC 1.-.-.-).  
Hypothetical oxidoreductase yqhD (EC 1.1.-.-).  
Hypothetical protein ygiQ.  
Topoisomerase IV subunit A (EC 5.99.1.-).  
Topoisomerase IV subunit B (EC 5.99.1.-).  
Hypothetical protein ygiC.  
Hypothetical protein ygiD.  
ADP-heptose synthase (EC 2.7.-.-).  
Hypothetical protein ygiF (ORFXE).  
Keto-acid formate acetyltransferase (EC 2.3.1.-) (Keto-acid formate- lyase).  
Propionate kinase (EC 2.7.2.-).  
Tagatose-1,6-bisphosphate aldolase agaY (EC 4.1.2.-) (TBPA).  
Putative galactosamine-6-phosphate isomerase (EC 5.3.1.-) (Galactosamine-6-phosphate deaminase).  
Hypothetical protein yraL.  
Hypothetical protein yhbW.  
Octaprenyl-diphosphate synthase (EC 2.5.1.-) (Octaprenyl pyrophosphate synthetase) (OPP synthetase).  
Protease degQ precursor (EC 3.4.21.-).  
Protease degS precursor (EC 3.4.21.-).  
Hypothetical amino-acid ABC transporter ATP-binding protein yhdZ.  
Para-aminobenzoate synthase glutamine amidotransferase component II (EC 4.1.3.-).  
Hypothetical sugar kinase yhfQ.  
Phosphotriesterase homology protein.  
Hypothetical protein yhfW.  
Glycogen operon protein glgX (EC 3.2.1.-).  
Biotin sulfoxide reductase (EC 1.-.-.-) (BDS reductase) (BSO reductase).  
Hypothetical oxidoreductase yiaK (EC 1.1.1.-).  
Probable hexulose-6-phosphate synthase (EC 4.1.2.-) (HUMPS) (D-arabino 3-hexulose 6-phosphate formaldehyde  
Probable sugar isomerase sgbE (EC 5.1.-.-).  
Hypothetical tRNA/rRNA methyltransferase yibK (EC 2.1.1.-).  
Hypothetical protein yibN.  
Hypothetical DNA ligase-like protein yicF.  
Putative family 31 glucosidase yicl.  
Putative sulfatase yidJ (EC 3.1.6.-).  
PTS system, arbutin-like IIC component (Phosphotransferase enzyme II, C component).  
Hypothetical protein yieH.  
Hypothetical protein yieK.  
Undecaprenyl-phosphate alpha-N-acetylglucosaminyl 1-phosphate transferase (EC 2.7.8.-) (UDP-GlcNAc:undecap  
UDP-N-acetyl-D-mannosamine dehydrogenase (EC 1.1.1.-) (UDP-ManNAc dehydrogenase).

Probable UDP-N-acetyl-D-mannosaminuronic acid transferase (EC 2.4.1.-) (UDP-ManNAcA transferase).  
Hypothetical protein yigB.  
Ubiquinone/menaquinone biosynthesis methyltransferase ubiE (EC 2.1.1.-).  
Hypothetical protein yihG.  
Putative family 31 glucosidase yihQ.  
Hypothetical protein yihR.  
Hypothetical protein yihT.  
Hypothetical oxidoreductase yihU (EC 1.1.-.-).  
Hypothetical sugar kinase yihV.  
Putative frv operon regulatory protein.  
ATP-dependent protease hslV (EC 3.4.25.-) (Heat shock protein hslV).  
Fructose-6-phosphate aldolase 2 (EC 4.1.2.-).  
PTS system, fructose-like-2 IIC component (Phosphotransferase enzyme II, C component).  
D-allulose-6-phosphate 3-epimerase (EC 5.1.3.-).  
Hypothetical tRNA/rRNA methyltransferase yjfH (EC 2.1.1.-).  
Hypothetical protein yjfC.  
AidB protein.  
Probable hexulose-6-phosphate synthase (EC 4.1.2.-) (HUMPS) (D-arabino 3-hexulose 6-phosphate formaldehyde  
Probable sugar isomerase sgaE (EC 5.1.-.-).  
UDP-N-acetylmuramate:L-alanyl-gamma-D-glutamyl-meso-diaminopimelate ligase (EC 6.3.2.-) (Murein peptide ligase)  
Hypothetical oxidoreductase yjgI (EC 1.-.-.-).  
Hypothetical protein yjhG.  
Protein sgcE (EC 5.1.3.-).  
Hypothetical protein yjiR.  
Hypothetical protein yjjG.  
Hypothetical protein yjjW.  
Lipoate-protein ligase A (EC 6.-.-.-).  
Hypothetical tRNA/rRNA methyltransferase lasT (EC 2.1.1.-).

(16S rRNA dimethylase) (High level kasugamycin resistance protein ksgA) (Kasugamycin dimethyltransferase).

otein).

) ubiquinol oxidase subunit 1) (Ubiquinol oxidase chain A).

V5) MTase hemK) (M.EcoKHemKP).

nponent) (Phosphotransferase enzyme II, C component).

Rb reductase).

se); Acyl-acyl carrier protein synthetase (Acyl-ACP synthetase)]

e lyase).

prenyl-phosphate GlcNAc-1- phosphate transferase).

e lyase).

ase).
