# Supplementary material
Source: PubMed Central journal article supplement (PMC535665)
Supplement: nar_32_21_6226__2.pdf [file nar_32_21_6226__2.pdf]

| Prosite pattern | Description                                                              |
|-----------------|--------------------------------------------------------------------------|
| PS00001         | N-glycosylation site.                                                    |
| PS00002         | Glycosaminoglycan attachment site.                                       |
| PS00003         | Tyrosine sulfation site.                                                 |
| PS00004         | cAMP- and cGMP-dependent protein kinase phosphorylation site.            |
| PS00005         | Protein kinase C phosphorylation site.                                   |
| PS00006         | Casein kinase II phosphorylation site.                                   |
| PS00007         | Tyrosine kinase phosphorylation site.                                    |
| PS00008         | N-myristoylation site.                                                   |
| PS00009         | Amidation site.                                                          |
| PS00012         | Phosphopantetheine attachment site.                                      |
| PS00013         | Prokaryotic membrane lipoprotein lipid attachment site.                  |
| PS00015         | Bipartite nuclear targeting sequence.                                    |
| PS00016         | Cell attachment sequence.                                                |
| PS00017         | ATP/GTP-binding site motif A (P-loop).                                   |
| PS00018         | EF-hand calcium-binding domain.                                          |
| PS00029         | Leucine zipper pattern.                                                  |
| PS00030         | Eukaryotic RNA Recognition Motif (RRM) RNP-1 region signature.           |
| PS00037         | Myb DNA-binding domain repeat signature 1.                               |
| PS00038         | Myc-type, 'helix-loop-helix' dimerization domain signature.              |
| PS00061         | Short-chain dehydrogenases/reductases family signature.                  |
| PS00063         | Aldo/keto reductase family putative active site signature.               |
| PS00070         | Aldehyde dehydrogenases cysteine active site.                            |
| PS00086         | Cytochrome P450 cysteine heme-iron ligand signature.                     |
| PS00107         | Protein kinases ATP-binding region signature.                            |
| PS00133         | Zinc carboxypeptidases, zinc-binding region 2 signature.                 |
| PS00134         | Serine proteases, trypsin family, histidine active site.                 |
| PS00135         | Serine proteases, trypsin family, serine active site.                    |
| PS00136         | Serine proteases, subtilase family, aspartic acid active site.           |
| PS00139         | Eukaryotic thiol (cysteine) proteases cysteine active site.              |
| PS00141         | Eukaryotic and viral aspartyl proteases active site.                     |
| PS00142         | Neutral zinc metallopeptidases, zinc-binding region signature.           |
| PS00178         | Aminoacyl-transfer RNA synthetases class-I signature.                    |
| PS00190         | Cytochrome c family heme-binding site signature.                         |
| PS00211         | ABC transporters family signature.                                       |
| PS00213         | Lipocalin signature.                                                     |
| PS00215         | Mitochondrial energy transfer proteins signature.                        |
| PS00216         | Sugar transport proteins signature 1.                                    |
| PS00225         | Crystallins beta and gamma 'Greek key' motif signature.                  |
| PS00237         | G-protein coupled receptors family 1 signature.                          |
| PS00290         | Immunoglobulins and major histocompatibility complex proteins signature. |
| PS00294         | Prenyl group binding site (CAAX box).                                    |
| PS00342         | Microbodies C-terminal targeting signal.                                 |
| PS00402         | Binding-protein-dependent transport systems inner membrane comp. sign.   |
| PS00430         | TonB-dependent receptor proteins signature 1.                            |
| PS00435         | Peroxidases proximal heme-ligand signature.                              |
| PS00589         | PTS HPR component serine phosphorylation site signature.                 |
| PS00599         | Aminotransferases class-II pyridoxal-phosphate attachment site.          |
| PS00626         | Regulator of chromosome condensation (RCC1) signature 2.                 |
| PS00639         | Eukaryotic thiol (cysteine) proteases histidine active site.             |
| PS00678         | Trp-Asp (WD) repeats signature.                                          |
| PS00687         | Aldehyde dehydrogenases glutamic acid active site.                       |

|         |                                                     |
|---------|-----------------------------------------------------|
| PS00867 | Carbamoyl-phosphate synthase subdomain signature 2. |
| PS50099 | Proline-rich region profile.                        |
| PS50240 | Serine proteases, trypsin domain profile.           |
| PS50310 | Alanine-rich region profile.                        |
| PS50311 | Cysteine-rich region profile.                       |
| PS50312 | Aspartic acid-rich region profile.                  |
| PS50313 | Glutamic acid-rich region profile.                  |
| PS50315 | Glycine-rich region profile.                        |
| PS50316 | Histidine-rich region profile.                      |
| PS50317 | Isoleucine-rich region profile.                     |
| PS50318 | Lysine-rich region profile.                         |
| PS50321 | Asparagine-rich region profile.                     |
| PS50322 | Glutamine-rich region profile.                      |
| PS50323 | Arginine-rich region profile.                       |
| PS50324 | Serine-rich region profile.                         |
| PS50325 | Threonine-rich region profile.                      |

| <b>Number of 4 digit EC numbers</b> |
|-------------------------------------|
| 1735                                |
| 94                                  |
| 1460                                |
| 1352                                |
| 1847                                |
| 1853                                |
| 1462                                |
| 1857                                |
| 1229                                |
| 44                                  |
| 118                                 |
| 537                                 |
| 614                                 |
| 437                                 |
| 45                                  |
| 395                                 |
| 42                                  |
| 20                                  |
| 38                                  |
| 52                                  |
| 26                                  |
| 32                                  |
| 29                                  |
| 26                                  |
| 21                                  |
| 44                                  |
| 43                                  |
| 28                                  |
| 24                                  |
| 35                                  |
| 68                                  |
| 32                                  |
| 65                                  |
| 27                                  |
| 27                                  |
| 45                                  |
| 22                                  |
| 77                                  |
| 23                                  |
| 34                                  |
| 42                                  |
| 343                                 |
| 32                                  |
| 64                                  |
| 20                                  |
| 26                                  |
| 21                                  |
| 26                                  |
| 56                                  |
| 22                                  |
| 31                                  |

|     |
|-----|
| 23  |
| 62  |
| 38  |
| 128 |
| 22  |
| 20  |
| 35  |
| 32  |
| 20  |
| 22  |
| 32  |
| 30  |
| 25  |
| 27  |
| 83  |
| 35  |
