# Supplementary material
Source: PubMed Central journal article supplement (PMC535665)
Supplement: nar_32_21_6226__3.pdf [file nar_32_21_6226__3.pdf]

| 4 digit EC number | Pattern 1 | Pattern 2 | Pattern 3 | Pattern 4 | Pattern 5 | Pattern 6 | Pattern 7 |
|-------------------|-----------|-----------|-----------|-----------|-----------|-----------|-----------|
| 1.1.1.1           | PS00044   | PS00059   |           |           |           |           |           |
| 1.1.1.2           | PS00059   | PS00933   |           |           |           |           |           |
| 1.1.1.205         | PS00487   | PS00912   |           |           |           |           |           |
| 1.1.1.23          | PS00611   | PS01095   |           |           |           |           |           |
| 1.1.1.3           | PS00165   | PS01042   |           |           |           |           |           |
| 1.1.1.3           | PS00318   | PS01042   |           |           |           |           |           |
| 1.1.1.3           | PS01042   |           |           |           |           |           |           |
| 1.1.1.34          | PS00066   | PS00120   | PS00318   | PS50065   |           |           |           |
| 1.1.1.34          | PS00066   | PS00318   | PS00879   | PS01192   | PS50065   | PS50156   |           |
| 1.1.1.34          | PS00066   | PS00318   | PS01192   | PS50065   | PS50156   |           |           |
| 1.1.1.34          | PS00066   | PS00318   | PS50065   | PS50156   |           |           |           |
| 1.1.1.38          | PS00217   | PS00331   |           |           |           |           |           |
| 1.1.1.40          | PS00120   | PS00331   |           |           |           |           |           |
| 1.1.1.44          | PS00461   |           |           |           |           |           |           |
| 1.1.1.85          | PS00307   | PS00470   |           |           |           |           |           |
| 1.1.1.94          | PS00449   | PS00957   |           |           |           |           |           |
| 1.1.1.95          | PS00065   | PS00306   | PS00670   | PS00671   |           |           |           |
| 1.1.2.3           | PS00191   | PS00557   | PS50255   |           |           |           |           |
| 1.1.3.15          | PS00044   | PS00557   |           |           |           |           |           |
| 1.1.99.5          | PS00977   |           |           |           |           |           |           |
| 1.1.99.5          | PS00977   | PS00978   |           |           |           |           |           |
| 1.10.3.1          | PS00210   | PS00497   | PS00498   |           |           |           |           |
| 1.11.1.6          | PS00047   | PS00437   | PS00438   |           |           |           |           |
| 1.11.1.6          | PS00437   |           |           |           |           |           |           |
| 1.11.1.6          | PS00437   | PS00438   |           |           |           |           |           |
| 1.11.1.6          | PS00437   | PS00438   | PS01034   |           |           |           |           |
| 1.11.1.6          | PS00438   |           |           |           |           |           |           |
| 1.11.1.9          | PS00014   | PS00460   | PS00763   |           |           |           |           |
| 1.13.11.31        | PS00081   | PS00659   | PS00711   | PS50095   |           |           |           |
| 1.13.11.42        | PS00876   | PS00877   |           |           |           |           |           |
| 1.14.11.4         | PS01325   |           |           |           |           |           |           |
| 1.14.13.39        | PS50902   | PS60001   |           |           |           |           |           |
| 1.14.17.3         | PS00084   | PS00085   | PS50320   |           |           |           |           |
| 1.14.19.1         | PS00191   | PS00476   | PS50255   |           |           |           |           |
| 1.14.19.1         | PS00476   |           |           |           |           |           |           |
| 1.14.19.2         | PS00574   |           |           |           |           |           |           |
| 1.14.99.3         | PS00593   |           |           |           |           |           |           |
| 1.15.1.1          | PS00087   | PS00332   |           |           |           |           |           |
| 1.15.1.1          | PS00088   |           |           |           |           |           |           |
| 1.17.4.1          | PS00089   | PS00185   |           |           |           |           |           |
| 1.17.4.1          | PS00089   | PS00583   |           |           |           |           |           |
| 1.17.4.1          | PS00368   |           |           |           |           |           |           |
| 1.17.4.1          | PS00368   | PS50817   | PS50818   | PS50819   |           |           |           |
| 1.18.6.1          | PS00065   | PS00692   | PS00746   |           |           |           |           |
| 1.2.1.12          | PS00071   | PS00584   |           |           |           |           |           |
| 1.2.1.41          | PS01223   |           |           |           |           |           |           |
| 1.2.1.59          | PS00071   | PS00422   |           |           |           |           |           |
| 1.3.1.26          | PS01298   |           |           |           |           |           |           |
| 1.3.1.70          | PS01017   | PS01018   | PS50319   |           |           |           |           |
| 1.3.3.1           | PS00911   |           |           |           |           |           |           |
| 1.3.3.1           | PS00911   | PS00912   |           |           |           |           |           |

|           |         |         |         |         |         |         |         |
|-----------|---------|---------|---------|---------|---------|---------|---------|
| 1.3.3.3   | PS01021 |         |         |         |         |         |         |
| 1.3.99.7  | PS00044 | PS00073 |         |         |         |         |         |
| 1.4.3.13  | PS00926 |         |         |         |         |         |         |
| 1.4.3.13  | PS00926 | PS50328 |         |         |         |         |         |
| 1.4.3.3   | PS00445 | PS00677 |         |         |         |         |         |
| 1.4.3.5   | PS00579 | PS01064 |         |         |         |         |         |
| 1.4.3.5   | PS01064 |         |         |         |         |         |         |
| 1.4.3.6   | PS00191 | PS01164 |         |         |         |         |         |
| 1.4.3.6   | PS01164 |         |         |         |         |         |         |
| 1.4.3.6   | PS01164 | PS01165 |         |         |         |         |         |
| 1.5.1.2   | PS00443 | PS00521 |         |         |         |         |         |
| 1.5.1.3   | PS00075 |         |         |         |         |         |         |
| 1.5.1.3   | PS00075 | PS00152 |         |         |         |         |         |
| 1.6.5.3   | PS00284 | PS50314 |         |         |         |         |         |
| 1.6.5.3   | PS00443 | PS00583 |         |         |         |         |         |
| 1.6.5.3   | PS00667 | PS00668 | PS50314 |         |         |         |         |
| 1.6.5.3   | PS00667 | PS00668 | PS50320 |         |         |         |         |
| 1.6.5.3   | PS00668 | PS50314 |         |         |         |         |         |
| 1.6.5.3   | PS50314 | PS50320 |         |         |         |         |         |
| 1.6.5.3   | PS50319 | PS50320 |         |         |         |         |         |
| 1.6.99.5  | PS00198 | PS00551 | PS00642 | PS00643 |         |         |         |
| 1.6.99.5  | PS00503 | PS00535 |         |         |         |         |         |
| 1.6.99.5  | PS00535 | PS00542 |         |         |         |         |         |
| 1.6.99.5  | PS00644 | PS00645 | PS01039 |         |         |         |         |
| 1.7.3.3   | PS00366 |         |         |         |         |         |         |
| 1.9.3.1   | PS00077 | PS00078 |         |         |         |         |         |
| 1.9.3.1   | PS00077 | PS00267 |         |         |         |         |         |
| 1.9.3.1   | PS00077 | PS00659 |         |         |         |         |         |
| 1.9.3.1   | PS00077 | PS50253 |         |         |         |         |         |
| 1.9.3.1   | PS00078 | PS00527 |         |         |         |         |         |
| 1.9.3.1   | PS00078 | PS50320 |         |         |         |         |         |
| 1.9.3.1   | PS00848 |         |         |         |         |         |         |
| 1.9.3.1   | PS01329 |         |         |         |         |         |         |
| 1.97.1.4  | PS01087 |         |         |         |         |         |         |
| 2.1.1.107 | PS00732 | PS00839 | PS00840 |         |         |         |         |
| 2.1.1.35  | PS01230 |         |         |         |         |         |         |
| 2.1.1.35  | PS01230 | PS01231 |         |         |         |         |         |
| 2.1.1.43  | PS00200 | PS50280 | PS50867 | PS50868 |         |         |         |
| 2.1.1.43  | PS00354 | PS01359 | PS50016 | PS50089 | PS50216 | PS50280 | PS50868 |
| 2.1.1.43  | PS00598 | PS50013 | PS50280 | PS50867 | PS50868 |         |         |
| 2.1.1.43  | PS50280 | PS50867 |         |         |         |         |         |
| 2.1.1.43  | PS50280 | PS50867 | PS50868 |         |         |         |         |
| 2.1.1.48  | PS01131 |         |         |         |         |         |         |
| 2.1.1.63  | PS00041 | PS00374 | PS01124 |         |         |         |         |
| 2.1.1.73  | PS00050 | PS00094 |         |         |         |         |         |
| 2.1.1.77  | PS00014 | PS01279 |         |         |         |         |         |
| 2.1.1.77  | PS00445 | PS01279 |         |         |         |         |         |
| 2.1.1.77  | PS01279 |         |         |         |         |         |         |
| 2.1.1.80  | PS50123 |         |         |         |         |         |         |
| 2.1.2.1   | PS00096 |         |         |         |         |         |         |
| 2.2.1.1   | PS00226 | PS00802 |         |         |         |         |         |
| 2.2.1.6   | PS00044 | PS00187 |         |         |         |         |         |

|           |         |         |         |         |         |         |  |
|-----------|---------|---------|---------|---------|---------|---------|--|
| 2.2.1.6   | PS00187 | PS00659 |         |         |         |         |  |
| 2.2.1.7   | PS00187 | PS00801 |         |         |         |         |  |
| 2.2.1.7   | PS00187 | PS00801 | PS00802 |         |         |         |  |
| 2.3.1.28  | PS00100 |         |         |         |         |         |  |
| 2.3.1.48  | PS00633 | PS01357 | PS50014 | PS50134 | PS50135 |         |  |
| 2.3.1.97  | PS00591 | PS00975 | PS00976 |         |         |         |  |
| 2.3.1.97  | PS00975 | PS00976 |         |         |         |         |  |
| 2.3.2.2   | PS00462 |         |         |         |         |         |  |
| 2.3.3.10  | PS01226 |         |         |         |         |         |  |
| 2.3.3.8   | PS00399 | PS01216 | PS01217 |         |         |         |  |
| 2.3.3.9   | PS00510 |         |         |         |         |         |  |
| 2.4.1.1   | PS00102 |         |         |         |         |         |  |
| 2.4.1.17  | PS00011 | PS00375 |         |         |         |         |  |
| 2.4.1.62  | PS00335 |         |         |         |         |         |  |
| 2.4.2.14  | PS00103 | PS00443 |         |         |         |         |  |
| 2.4.2.17  | PS01316 |         |         |         |         |         |  |
| 2.4.2.31  | PS01291 |         |         |         |         |         |  |
| 2.4.2.7   | PS00103 | PS50326 |         |         |         |         |  |
| 2.5.1.15  | PS00792 |         |         |         |         |         |  |
| 2.5.1.15  | PS00792 | PS00793 |         |         |         |         |  |
| 2.5.1.15  | PS00793 |         |         |         |         |         |  |
| 2.5.1.16  | PS00228 | PS01330 |         |         |         |         |  |
| 2.5.1.19  | PS00104 | PS00885 | PS01118 |         |         |         |  |
| 2.5.1.19  | PS00885 |         |         |         |         |         |  |
| 2.5.1.21  | PS01044 | PS01045 |         |         |         |         |  |
| 2.5.1.31  | PS00962 | PS01066 |         |         |         |         |  |
| 2.5.1.31  | PS01066 |         |         |         |         |         |  |
| 2.5.1.47  | PS00165 | PS00901 |         |         |         |         |  |
| 2.5.1.47  | PS00217 | PS00901 |         |         |         |         |  |
| 2.5.1.6   | PS00376 |         |         |         |         |         |  |
| 2.5.1.6   | PS00376 | PS00377 |         |         |         |         |  |
| 2.5.1.6   | PS00377 |         |         |         |         |         |  |
| 2.6.1.1   | PS00105 | PS00217 |         |         |         |         |  |
| 2.6.1.1   | PS00105 | PS01319 |         |         |         |         |  |
| 2.6.1.11  | PS00196 | PS00600 |         |         |         |         |  |
| 2.6.1.11  | PS00600 | PS01067 |         |         |         |         |  |
| 2.6.1.16  | PS00443 | PS01039 |         |         |         |         |  |
| 2.6.1.16  | PS00443 | PS50817 | PS50818 | PS50819 |         |         |  |
| 2.7.1.107 | PS01069 |         |         |         |         |         |  |
| 2.7.1.11  | PS00014 | PS00433 |         |         |         |         |  |
| 2.7.1.112 | PS00021 | PS00109 | PS00239 | PS50011 | PS50038 | PS50070 |  |
| 2.7.1.112 | PS00021 | PS00109 | PS50011 | PS50038 | PS50070 |         |  |
| 2.7.1.112 | PS00109 | PS00214 | PS00239 | PS50011 |         |         |  |
| 2.7.1.112 | PS00109 | PS00239 | PS00317 | PS50011 |         |         |  |
| 2.7.1.112 | PS00109 | PS00239 | PS00453 | PS50011 |         |         |  |
| 2.7.1.112 | PS00109 | PS00239 | PS01118 | PS50011 |         |         |  |
| 2.7.1.112 | PS00109 | PS00239 | PS50011 |         |         |         |  |
| 2.7.1.112 | PS00109 | PS00240 | PS50011 |         |         |         |  |
| 2.7.1.112 | PS00109 | PS00406 | PS01132 | PS50001 | PS50011 |         |  |
| 2.7.1.112 | PS00109 | PS00501 | PS50011 | PS50108 |         |         |  |
| 2.7.1.112 | PS00109 | PS00790 | PS00791 | PS50011 | PS50105 |         |  |
| 2.7.1.112 | PS00109 | PS50001 | PS50011 |         |         |         |  |

|           |         |         |         |         |         |  |  |
|-----------|---------|---------|---------|---------|---------|--|--|
| 2.7.1.112 | PS00109 | PS50001 | PS50011 | PS50057 |         |  |  |
| 2.7.1.112 | PS00109 | PS50001 | PS50011 | PS50133 |         |  |  |
| 2.7.1.112 | PS00109 | PS50011 | PS50057 |         |         |  |  |
| 2.7.1.112 | PS00109 | PS50011 | PS50105 |         |         |  |  |
| 2.7.1.112 | PS00109 | PS50011 | PS50268 |         |         |  |  |
| 2.7.1.137 | PS00915 | PS50077 | PS50290 |         |         |  |  |
| 2.7.1.154 | PS00915 | PS00916 | PS50195 | PS50290 |         |  |  |
| 2.7.1.19  | PS00567 |         |         |         |         |  |  |
| 2.7.1.21  | PS00603 |         |         |         |         |  |  |
| 2.7.1.30  | PS00445 | PS00761 | PS00933 |         |         |  |  |
| 2.7.1.30  | PS00445 | PS00933 | PS00962 |         |         |  |  |
| 2.7.1.37  | PS00041 | PS00915 | PS00916 | PS50290 |         |  |  |
| 2.7.1.37  | PS00092 | PS00108 | PS50011 |         |         |  |  |
| 2.7.1.37  | PS00108 | PS00152 | PS01351 | PS50011 |         |  |  |
| 2.7.1.37  | PS00108 | PS00191 | PS50011 |         |         |  |  |
| 2.7.1.37  | PS00108 | PS00284 | PS50011 |         |         |  |  |
| 2.7.1.37  | PS00108 | PS00381 | PS50011 | PS50125 |         |  |  |
| 2.7.1.37  | PS00108 | PS00479 | PS50011 | PS50081 | PS50898 |  |  |
| 2.7.1.37  | PS00108 | PS00501 | PS50011 |         |         |  |  |
| 2.7.1.37  | PS00108 | PS01351 | PS50011 |         |         |  |  |
| 2.7.1.37  | PS00108 | PS50006 | PS50011 |         |         |  |  |
| 2.7.1.37  | PS00108 | PS50011 | PS50012 |         |         |  |  |
| 2.7.1.37  | PS00108 | PS50011 | PS50017 |         |         |  |  |
| 2.7.1.37  | PS00108 | PS50011 | PS50078 |         |         |  |  |
| 2.7.1.37  | PS00108 | PS50011 | PS50105 |         |         |  |  |
| 2.7.1.37  | PS00108 | PS50011 | PS50108 |         |         |  |  |
| 2.7.1.37  | PS00108 | PS50011 | PS50195 |         |         |  |  |
| 2.7.1.37  | PS00108 | PS50011 | PS50209 |         |         |  |  |
| 2.7.1.39  | PS00044 | PS00627 |         |         |         |  |  |
| 2.7.1.56  | PS00464 | PS00583 | PS00584 |         |         |  |  |
| 2.7.1.6   | PS00059 | PS00106 | PS00627 |         |         |  |  |
| 2.7.1.6   | PS00106 | PS00627 |         |         |         |  |  |
| 2.7.1.69  | PS00044 | PS01035 |         |         |         |  |  |
| 2.7.1.69  | PS00287 | PS01035 |         |         |         |  |  |
| 2.7.1.69  | PS00369 | PS00372 |         |         |         |  |  |
| 2.7.1.69  | PS00371 | PS01035 |         |         |         |  |  |
| 2.7.1.69  | PS00372 | PS00387 |         |         |         |  |  |
| 2.7.1.69  | PS01035 |         |         |         |         |  |  |
| 2.7.2.1   | PS00104 | PS01075 | PS01076 |         |         |  |  |
| 2.7.2.1   | PS00445 | PS01075 | PS01076 |         |         |  |  |
| 2.7.2.1   | PS00758 | PS01075 | PS01076 |         |         |  |  |
| 2.7.2.11  | PS00153 | PS00902 |         |         |         |  |  |
| 2.7.2.11  | PS00327 | PS00902 |         |         |         |  |  |
| 2.7.2.11  | PS00659 | PS00902 |         |         |         |  |  |
| 2.7.2.11  | PS00902 |         |         |         |         |  |  |
| 2.7.2.11  | PS00902 | PS50890 |         |         |         |  |  |
| 2.7.2.3   | PS00111 |         |         |         |         |  |  |
| 2.7.2.3   | PS00111 | PS00453 |         |         |         |  |  |
| 2.7.2.4   | PS00324 |         |         |         |         |  |  |
| 2.7.3.9   | PS00369 | PS00370 | PS00742 |         |         |  |  |
| 2.7.4.3   | PS00113 | PS00202 |         |         |         |  |  |
| 2.7.4.3   | PS00113 | PS50052 |         |         |         |  |  |

|          |         |         |         |         |         |  |  |
|----------|---------|---------|---------|---------|---------|--|--|
| 2.7.4.9  | PS01331 |         |         |         |         |  |  |
| 2.7.6.1  | PS00103 | PS00114 |         |         |         |  |  |
| 2.7.6.1  | PS00103 | PS00114 | PS00144 |         |         |  |  |
| 2.7.6.1  | PS00114 |         |         |         |         |  |  |
| 2.7.7.12 | PS00117 |         |         |         |         |  |  |
| 2.7.7.12 | PS01163 |         |         |         |         |  |  |
| 2.7.7.27 | PS00808 |         |         |         |         |  |  |
| 2.7.7.27 | PS00808 | PS00809 |         |         |         |  |  |
| 2.7.7.27 | PS00808 | PS00809 | PS00810 |         |         |  |  |
| 2.7.7.27 | PS00808 | PS00810 |         |         |         |  |  |
| 2.7.7.27 | PS00809 |         |         |         |         |  |  |
| 2.7.7.27 | PS00809 | PS00810 |         |         |         |  |  |
| 2.7.7.3  | PS01190 |         |         |         |         |  |  |
| 2.7.7.41 | PS01315 |         |         |         |         |  |  |
| 2.7.7.56 | PS01277 |         |         |         |         |  |  |
| 2.7.7.59 | PS00152 | PS00228 |         |         |         |  |  |
| 2.7.7.6  | PS00011 | PS00466 |         |         |         |  |  |
| 2.7.7.6  | PS00115 |         |         |         |         |  |  |
| 2.7.7.6  | PS00120 | PS01166 |         |         |         |  |  |
| 2.7.7.6  | PS00163 | PS00466 | PS01030 |         |         |  |  |
| 2.7.7.6  | PS00192 | PS01166 |         |         |         |  |  |
| 2.7.7.6  | PS00283 | PS01166 |         |         |         |  |  |
| 2.7.7.6  | PS00327 | PS01166 |         |         |         |  |  |
| 2.7.7.6  | PS00446 |         |         |         |         |  |  |
| 2.7.7.6  | PS00466 | PS01030 |         |         |         |  |  |
| 2.7.7.6  | PS00489 | PS00900 |         |         |         |  |  |
| 2.7.7.6  | PS01030 |         |         |         |         |  |  |
| 2.7.7.6  | PS01110 |         |         |         |         |  |  |
| 2.7.7.6  | PS01111 |         |         |         |         |  |  |
| 2.7.7.6  | PS01112 |         |         |         |         |  |  |
| 2.7.7.6  | PS01154 |         |         |         |         |  |  |
| 2.7.7.6  | PS01166 |         |         |         |         |  |  |
| 2.7.7.60 | PS00485 | PS01295 |         |         |         |  |  |
| 2.7.7.7  | PS00044 | PS00116 |         |         |         |  |  |
| 2.7.7.7  | PS00116 | PS00119 |         |         |         |  |  |
| 2.7.7.7  | PS00116 | PS00214 |         |         |         |  |  |
| 2.7.7.7  | PS00116 | PS00214 | PS50817 | PS50818 | PS50819 |  |  |
| 2.7.7.7  | PS00116 | PS50077 | PS50817 | PS50818 | PS50819 |  |  |
| 2.7.7.7  | PS00116 | PS50817 | PS50818 | PS50819 |         |  |  |
| 2.7.7.7  | PS00307 | PS00447 |         |         |         |  |  |
| 2.7.7.7  | PS00307 | PS00447 | PS00449 |         |         |  |  |
| 2.7.7.7  | PS00447 | PS00659 |         |         |         |  |  |
| 2.7.8.13 | PS00287 | PS01347 | PS01348 |         |         |  |  |
| 2.7.8.13 | PS01347 | PS01348 |         |         |         |  |  |
| 2.7.8.13 | PS01348 |         |         |         |         |  |  |
| 2.8.3.5  | PS01273 | PS01274 |         |         |         |  |  |
| 3.1.1.1  | PS00014 | PS00122 | PS00941 |         |         |  |  |
| 3.1.1.1  | PS00120 | PS00122 | PS00941 |         |         |  |  |
| 3.1.1.11 | PS00503 | PS00800 |         |         |         |  |  |
| 3.1.1.29 | PS00217 | PS01195 | PS01196 |         |         |  |  |
| 3.1.1.29 | PS00217 | PS01196 |         |         |         |  |  |
| 3.1.1.29 | PS01195 |         |         |         |         |  |  |

|           |         |         |         |         |         |         |         |
|-----------|---------|---------|---------|---------|---------|---------|---------|
| 3.1.1.29  | PS01195 | PS01196 |         |         |         |         |         |
| 3.1.1.29  | PS01196 |         |         |         |         |         |         |
| 3.1.1.3   | PS01173 | PS01174 |         |         |         |         |         |
| 3.1.1.61  | PS50110 | PS50122 |         |         |         |         |         |
| 3.1.1.61  | PS50122 |         |         |         |         |         |         |
| 3.1.1.74  | PS00120 | PS00155 |         |         |         |         |         |
| 3.1.1.74  | PS00120 | PS00155 | PS00931 |         |         |         |         |
| 3.1.1.74  | PS00155 |         |         |         |         |         |         |
| 3.1.1.74  | PS00155 | PS00931 |         |         |         |         |         |
| 3.1.2.15  | PS00152 | PS00972 | PS00973 | PS50235 |         |         |         |
| 3.1.2.15  | PS00228 | PS00972 | PS00973 | PS50235 |         |         |         |
| 3.1.2.15  | PS00299 | PS00972 | PS00973 | PS50053 | PS50235 |         |         |
| 3.1.2.15  | PS00304 | PS00972 | PS00973 | PS50206 | PS50235 |         |         |
| 3.1.2.15  | PS00572 | PS00972 | PS00973 | PS50206 | PS50235 |         |         |
| 3.1.2.15  | PS00972 | PS00973 | PS50030 | PS50235 |         |         |         |
| 3.1.2.15  | PS00972 | PS00973 | PS50144 | PS50235 |         |         |         |
| 3.1.2.15  | PS00972 | PS00973 | PS50206 | PS50235 |         |         |         |
| 3.1.2.15  | PS00972 | PS00973 | PS50235 |         |         |         |         |
| 3.1.2.15  | PS00972 | PS00973 | PS50235 | PS50330 |         |         |         |
| 3.1.2.15  | PS00972 | PS50235 |         |         |         |         |         |
| 3.1.2.15  | PS00973 | PS50235 |         |         |         |         |         |
| 3.1.2.23  | PS01328 |         |         |         |         |         |         |
| 3.1.21.1  | PS00918 |         |         |         |         |         |         |
| 3.1.21.1  | PS00918 | PS00919 |         |         |         |         |         |
| 3.1.21.1  | PS00919 |         |         |         |         |         |         |
| 3.1.22.4  | PS01321 |         |         |         |         |         |         |
| 3.1.26.3  | PS00517 | PS50142 |         |         |         |         |         |
| 3.1.3.11  | PS00124 | PS00165 |         |         |         |         |         |
| 3.1.3.16  | PS00125 | PS00732 |         |         |         |         |         |
| 3.1.3.2   | PS01157 |         |         |         |         |         |         |
| 3.1.3.48  | PS00383 | PS00660 | PS00661 | PS50055 | PS50056 | PS50057 |         |
| 3.1.3.48  | PS00383 | PS00660 | PS00661 | PS50055 | PS50056 | PS50057 | PS50106 |
| 3.1.3.48  | PS00383 | PS00740 | PS50055 | PS50056 | PS50060 |         |         |
| 3.1.3.48  | PS00383 | PS50001 | PS50055 | PS50056 |         |         |         |
| 3.1.3.48  | PS00383 | PS50055 | PS50056 | PS50191 |         |         |         |
| 3.1.3.48  | PS00383 | PS50055 | PS50056 | PS50206 |         |         |         |
| 3.1.30.2  | PS01070 |         |         |         |         |         |         |
| 3.1.31.1  | PS01123 | PS01284 | PS50830 |         |         |         |         |
| 3.1.4.11  | PS50001 | PS50002 | PS50003 | PS50004 | PS50007 | PS50008 |         |
| 3.1.4.11  | PS50004 | PS50007 | PS50008 |         |         |         |         |
| 3.1.4.11  | PS50007 | PS50008 |         |         |         |         |         |
| 3.1.4.17  | PS00126 |         |         |         |         |         |         |
| 3.1.4.17  | PS00126 | PS50110 |         |         |         |         |         |
| 3.1.4.17  | PS00126 | PS50319 |         |         |         |         |         |
| 3.1.4.17  | PS00607 |         |         |         |         |         |         |
| 3.1.4.3   | PS00384 |         |         |         |         |         |         |
| 3.1.4.3   | PS00384 | PS50095 |         |         |         |         |         |
| 3.1.6.8   | PS00149 | PS00262 | PS00523 |         |         |         |         |
| 3.1.8.1   | PS01322 | PS01323 |         |         |         |         |         |
| 3.10.1.1  | PS00014 | PS00149 | PS00523 |         |         |         |         |
| 3.2.1.132 | PS60000 |         |         |         |         |         |         |
| 3.2.1.14  | PS00014 | PS00583 | PS01095 |         |         |         |         |

|            |         |         |         |         |         |         |         |
|------------|---------|---------|---------|---------|---------|---------|---------|
| 3.2.1.14   | PS00026 | PS00773 | PS00774 |         |         |         |         |
| 3.2.1.14   | PS00026 | PS01095 |         |         |         |         |         |
| 3.2.1.14   | PS00561 | PS01095 |         |         |         |         |         |
| 3.2.1.14   | PS00583 | PS01095 |         |         |         |         |         |
| 3.2.1.14   | PS00773 | PS00774 |         |         |         |         |         |
| 3.2.1.15   | PS00071 | PS00502 |         |         |         |         |         |
| 3.2.1.17   | PS00953 |         |         |         |         |         |         |
| 3.2.1.21   | PS00559 | PS00775 |         |         |         |         |         |
| 3.2.1.22   | PS00217 | PS01324 |         |         |         |         |         |
| 3.2.1.23   | PS01182 |         |         |         |         |         |         |
| 3.2.1.28   | PS00387 | PS00927 | PS00928 |         |         |         |         |
| 3.2.1.28   | PS00927 |         |         |         |         |         |         |
| 3.2.1.28   | PS00927 | PS00928 |         |         |         |         |         |
| 3.2.1.3    | PS00820 |         |         |         |         |         |         |
| 3.2.1.4    | PS00214 | PS00659 |         |         |         |         |         |
| 3.2.1.4    | PS00443 | PS00659 |         |         |         |         |         |
| 3.2.1.4    | PS00448 | PS00592 | PS00698 |         |         |         |         |
| 3.2.1.4    | PS00561 | PS00592 | PS00698 |         |         |         |         |
| 3.2.1.4    | PS00561 | PS00659 |         |         |         |         |         |
| 3.2.1.4    | PS00561 | PS01140 |         |         |         |         |         |
| 3.2.1.4    | PS00562 | PS00591 |         |         |         |         |         |
| 3.2.1.4    | PS00562 | PS00659 |         |         |         |         |         |
| 3.2.1.4    | PS00562 | PS01140 |         |         |         |         |         |
| 3.2.1.4    | PS00562 | PS01140 | PS50842 |         |         |         |         |
| 3.2.1.4    | PS00592 |         |         |         |         |         |         |
| 3.2.1.4    | PS00592 | PS00698 |         |         |         |         |         |
| 3.2.1.4    | PS00698 |         |         |         |         |         |         |
| 3.2.1.4    | PS01140 |         |         |         |         |         |         |
| 3.2.1.51   | PS00385 |         |         |         |         |         |         |
| 3.2.1.52   | PS00775 | PS01044 |         |         |         |         |         |
| 3.2.1.67   | PS00193 | PS00502 |         |         |         |         |         |
| 3.2.1.73   | PS00217 | PS01034 |         |         |         |         |         |
| 3.2.1.8    | PS00591 | PS00776 | PS00777 | PS50327 |         |         |         |
| 3.2.1.8    | PS00776 | PS00777 |         |         |         |         |         |
| 3.2.2.21   | PS00516 |         |         |         |         |         |         |
| 3.2.2.22   | PS00275 |         |         |         |         |         |         |
| 3.2.2.23   | PS01242 |         |         |         |         |         |         |
| 3.3.1.1    | PS00738 | PS00739 |         |         |         |         |         |
| 3.3.1.1    | PS00739 |         |         |         |         |         |         |
| 3.4.11.1   | PS00277 | PS00631 |         |         |         |         |         |
| 3.4.11.14  | PS00392 | PS00758 | PS00759 |         |         |         |         |
| 3.4.11.18  | PS00680 |         |         |         |         |         |         |
| 3.4.11.18  | PS01202 |         |         |         |         |         |         |
| 3.4.13.19  | PS00869 |         |         |         |         |         |         |
| 3.4.19.3   | PS01333 |         |         |         |         |         |         |
| 3.4.19.3   | PS01333 | PS01334 |         |         |         |         |         |
| 3.4.19.3   | PS01334 |         |         |         |         |         |         |
| 3.4.21.101 | PS00138 | PS50093 |         |         |         |         |         |
| 3.4.21.19  | PS00672 | PS00673 |         |         |         |         |         |
| 3.4.21.53  | PS01046 |         |         |         |         |         |         |
| 3.4.21.61  | PS00137 | PS00138 | PS00307 |         |         |         |         |
| 3.4.21.9   | PS00740 | PS01180 | PS01209 | PS50024 | PS50060 | PS50068 | PS50287 |

|           |         |         |         |         |         |         |  |
|-----------|---------|---------|---------|---------|---------|---------|--|
| 3.4.21.92 | PS00381 | PS00382 |         |         |         |         |  |
| 3.4.21.96 | PS00137 | PS00138 | PS50847 |         |         |         |  |
| 3.4.22.36 | PS00455 | PS01121 | PS01122 | PS50207 | PS50208 | PS50209 |  |
| 3.4.22.36 | PS01121 | PS01122 | PS50207 | PS50208 | PS50209 |         |  |
| 3.4.23.36 | PS00855 |         |         |         |         |         |  |
| 3.4.24.57 | PS01016 |         |         |         |         |         |  |
| 3.4.25.1  | PS00388 |         |         |         |         |         |  |
| 3.4.25.1  | PS00388 | PS00854 |         |         |         |         |  |
| 3.4.25.1  | PS00761 | PS00854 |         |         |         |         |  |
| 3.4.25.1  | PS00854 |         |         |         |         |         |  |
| 3.5.1.1   | PS00144 | PS00445 | PS00917 |         |         |         |  |
| 3.5.1.5   | PS00024 | PS00145 | PS01120 |         |         |         |  |
| 3.5.1.5   | PS00145 |         |         |         |         |         |  |
| 3.5.1.5   | PS00145 | PS00403 | PS01120 |         |         |         |  |
| 3.5.1.5   | PS00145 | PS01120 |         |         |         |         |  |
| 3.5.1.5   | PS01120 |         |         |         |         |         |  |
| 3.5.2.3   | PS00482 | PS00483 |         |         |         |         |  |
| 3.5.2.3   | PS00483 |         |         |         |         |         |  |
| 3.5.2.5   | PS00482 | PS01137 |         |         |         |         |  |
| 3.5.2.6   | PS00336 |         |         |         |         |         |  |
| 3.5.2.6   | PS00337 |         |         |         |         |         |  |
| 3.5.2.6   | PS00743 | PS00744 |         |         |         |         |  |
| 3.5.4.16  | PS00859 |         |         |         |         |         |  |
| 3.5.4.16  | PS00859 | PS00860 |         |         |         |         |  |
| 3.5.99.6  | PS01161 |         |         |         |         |         |  |
| 3.6.1.13  | PS00287 | PS00893 |         |         |         |         |  |
| 3.6.1.7   | PS00150 | PS00151 |         |         |         |         |  |
| 3.6.3.1   | PS00154 | PS00338 |         |         |         |         |  |
| 3.6.3.12  | PS00154 | PS00591 | PS01229 |         |         |         |  |
| 3.6.3.14  | PS00044 | PS00449 |         |         |         |         |  |
| 3.6.3.14  | PS00095 | PS00152 |         |         |         |         |  |
| 3.6.3.14  | PS00152 | PS50817 | PS50818 |         |         |         |  |
| 3.6.3.14  | PS00152 | PS50817 | PS50818 | PS50819 |         |         |  |
| 3.6.3.14  | PS00152 | PS50817 | PS50819 |         |         |         |  |
| 3.6.3.14  | PS00449 | PS50319 |         |         |         |         |  |
| 3.6.3.14  | PS00449 | PS50320 |         |         |         |         |  |
| 3.6.3.4   | PS00154 | PS50320 |         |         |         |         |  |
| 3.6.3.6   | PS00154 | PS00214 |         |         |         |         |  |
| 3.6.3.6   | PS00154 | PS00962 |         |         |         |         |  |
| 3.6.3.8   | PS00154 | PS00228 |         |         |         |         |  |
| 3.8.1.4   | PS01205 |         |         |         |         |         |  |
| 4.1.1.15  | PS00119 | PS00392 |         |         |         |         |  |
| 4.1.1.15  | PS00392 | PS01039 |         |         |         |         |  |
| 4.1.1.17  | PS00196 | PS00703 |         |         |         |         |  |
| 4.1.1.23  | PS00156 |         |         |         |         |         |  |
| 4.1.1.31  | PS00393 |         |         |         |         |         |  |
| 4.1.1.31  | PS00393 | PS00781 |         |         |         |         |  |
| 4.1.1.32  | PS00505 |         |         |         |         |         |  |
| 4.1.1.37  | PS00066 | PS00906 | PS00907 |         |         |         |  |
| 4.1.1.37  | PS00906 |         |         |         |         |         |  |
| 4.1.1.37  | PS00906 | PS00907 |         |         |         |         |  |
| 4.1.1.37  | PS00906 | PS00907 | PS01039 |         |         |         |  |



|           |         |         |         |         |  |  |  |
|-----------|---------|---------|---------|---------|--|--|--|
| 4.1.1.37  | PS00907 |         |         |         |  |  |  |
| 4.1.1.49  | PS00532 |         |         |         |  |  |  |
| 4.1.1.50  | PS00591 | PS01336 |         |         |  |  |  |
| 4.1.1.50  | PS01336 |         |         |         |  |  |  |
| 4.1.2.13  | PS00152 | PS00602 | PS00806 |         |  |  |  |
| 4.1.2.13  | PS00158 |         |         |         |  |  |  |
| 4.1.2.13  | PS00602 |         |         |         |  |  |  |
| 4.1.2.13  | PS00602 | PS00806 |         |         |  |  |  |
| 4.1.2.13  | PS00806 |         |         |         |  |  |  |
| 4.1.2.14  | PS00159 | PS00160 | PS00165 |         |  |  |  |
| 4.1.3.27  | PS00442 | PS00690 |         |         |  |  |  |
| 4.1.3.3   | PS00217 | PS00228 | PS00665 | PS00666 |  |  |  |
| 4.1.3.3   | PS00217 | PS00665 | PS00666 |         |  |  |  |
| 4.1.3.4   | PS01062 |         |         |         |  |  |  |
| 4.1.99.3  | PS00104 | PS00394 | PS00691 |         |  |  |  |
| 4.1.99.3  | PS00230 | PS00394 | PS00691 |         |  |  |  |
| 4.1.99.3  | PS01083 | PS01084 |         |         |  |  |  |
| 4.2.1.1   | PS00704 | PS00705 |         |         |  |  |  |
| 4.2.1.1   | PS00705 |         |         |         |  |  |  |
| 4.2.1.10  | PS01028 |         |         |         |  |  |  |
| 4.2.1.10  | PS01029 |         |         |         |  |  |  |
| 4.2.1.19  | PS00954 |         |         |         |  |  |  |
| 4.2.1.19  | PS00955 |         |         |         |  |  |  |
| 4.2.1.20  | PS00167 |         |         |         |  |  |  |
| 4.2.1.20  | PS00167 | PS00168 |         |         |  |  |  |
| 4.2.1.20  | PS00167 | PS00201 |         |         |  |  |  |
| 4.2.1.20  | PS00167 | PS50007 |         |         |  |  |  |
| 4.2.1.20  | PS00168 |         |         |         |  |  |  |
| 4.2.1.24  | PS00169 |         |         |         |  |  |  |
| 4.2.1.3   | PS00099 | PS00450 | PS01244 |         |  |  |  |
| 4.2.1.49  | PS01233 |         |         |         |  |  |  |
| 4.2.1.52  | PS00041 | PS00665 | PS00666 |         |  |  |  |
| 4.2.1.52  | PS00583 | PS00665 | PS00666 |         |  |  |  |
| 4.2.1.70  | PS00104 | PS01129 | PS50889 |         |  |  |  |
| 4.2.1.70  | PS01129 |         |         |         |  |  |  |
| 4.2.1.70  | PS01149 |         |         |         |  |  |  |
| 4.2.1.70  | PS01268 |         |         |         |  |  |  |
| 4.2.3.12  | PS00987 |         |         |         |  |  |  |
| 4.2.3.12  | PS00987 | PS00988 |         |         |  |  |  |
| 4.2.3.3   | PS01335 |         |         |         |  |  |  |
| 4.2.3.5   | PS00217 | PS00787 | PS00788 | PS00789 |  |  |  |
| 4.2.3.5   | PS00787 | PS00788 |         |         |  |  |  |
| 4.2.3.5   | PS00787 | PS00788 | PS00789 |         |  |  |  |
| 4.2.3.5   | PS00787 | PS00789 |         |         |  |  |  |
| 4.2.3.5   | PS00788 | PS00789 |         |         |  |  |  |
| 4.2.99.18 | PS00726 | PS00727 | PS00728 | PS50800 |  |  |  |
| 4.3.1.19  | PS00043 | PS00165 |         |         |  |  |  |
| 4.3.1.3   | PS00217 | PS00488 |         |         |  |  |  |
| 4.3.1.8   | PS00533 |         |         |         |  |  |  |
| 4.3.2.1   | PS00163 | PS00284 |         |         |  |  |  |
| 4.3.2.1   | PS00163 | PS00636 |         |         |  |  |  |
| 4.4.1.1   | PS00087 | PS00868 |         |         |  |  |  |

|          |         |         |         |  |  |  |  |
|----------|---------|---------|---------|--|--|--|--|
| 4.4.1.17 | PS00821 | PS00822 |         |  |  |  |  |
| 4.4.1.17 | PS00822 |         |         |  |  |  |  |
| 4.4.1.5  | PS00934 | PS00935 |         |  |  |  |  |
| 4.6.1.1  | PS00137 | PS00452 | PS50125 |  |  |  |  |
| 4.6.1.1  | PS00177 | PS50125 |         |  |  |  |  |
| 4.6.1.1  | PS00452 | PS50125 | PS50839 |  |  |  |  |
| 4.6.1.1  | PS00659 | PS50125 | PS50200 |  |  |  |  |
| 4.6.1.1  | PS01092 | PS01093 |         |  |  |  |  |
| 4.6.1.1  | PS01103 | PS50125 | PS50200 |  |  |  |  |
| 4.6.1.1  | PS50110 | PS50125 |         |  |  |  |  |
| 4.6.1.12 | PS01350 |         |         |  |  |  |  |
| 4.99.1.1 | PS00534 |         |         |  |  |  |  |
| 5.1.1.1  | PS00395 |         |         |  |  |  |  |
| 5.1.1.7  | PS01326 |         |         |  |  |  |  |
| 5.1.3.1  | PS01085 |         |         |  |  |  |  |
| 5.1.3.1  | PS01085 | PS01086 |         |  |  |  |  |
| 5.2.1.8  | PS00014 | PS00170 | PS50072 |  |  |  |  |
| 5.2.1.8  | PS00014 | PS00453 | PS50059 |  |  |  |  |
| 5.2.1.8  | PS00014 | PS00454 | PS50059 |  |  |  |  |
| 5.2.1.8  | PS00014 | PS50059 |         |  |  |  |  |
| 5.2.1.8  | PS00170 | PS50072 |         |  |  |  |  |
| 5.2.1.8  | PS00453 | PS00454 | PS50059 |  |  |  |  |
| 5.2.1.8  | PS00453 | PS50059 |         |  |  |  |  |
| 5.2.1.8  | PS00454 | PS50059 |         |  |  |  |  |
| 5.2.1.8  | PS01096 | PS50198 |         |  |  |  |  |
| 5.2.1.8  | PS50072 |         |         |  |  |  |  |
| 5.2.1.8  | PS50198 |         |         |  |  |  |  |
| 5.3.1.1  | PS00171 |         |         |  |  |  |  |
| 5.3.1.1  | PS00171 | PS00389 |         |  |  |  |  |
| 5.3.1.5  | PS00172 | PS00173 |         |  |  |  |  |
| 5.3.1.8  | PS00965 | PS00966 |         |  |  |  |  |
| 5.3.1.8  | PS00966 |         |         |  |  |  |  |
| 5.3.1.9  | PS00174 |         |         |  |  |  |  |
| 5.3.1.9  | PS00174 | PS00230 |         |  |  |  |  |
| 5.3.1.9  | PS00174 | PS00765 |         |  |  |  |  |
| 5.3.1.9  | PS00174 | PS00765 | PS50097 |  |  |  |  |
| 5.3.1.9  | PS00765 |         |         |  |  |  |  |
| 5.4.3.8  | PS00228 | PS00600 |         |  |  |  |  |
| 5.4.99.2 | PS00043 | PS00544 |         |  |  |  |  |
| 5.4.99.2 | PS00268 | PS00544 |         |  |  |  |  |
| 5.4.99.2 | PS00544 |         |         |  |  |  |  |
| 5.4.99.7 | PS00196 | PS01074 |         |  |  |  |  |
| 5.99.1.2 | PS00043 | PS00396 |         |  |  |  |  |
| 5.99.1.2 | PS00396 |         |         |  |  |  |  |
| 5.99.1.3 | PS00087 | PS00177 |         |  |  |  |  |
| 5.99.1.3 | PS00154 | PS00177 |         |  |  |  |  |
| 5.99.1.3 | PS00177 | PS00217 |         |  |  |  |  |
| 5.99.1.3 | PS00177 | PS50817 | PS50818 |  |  |  |  |
| 6.1.1.11 | PS00595 | PS50862 |         |  |  |  |  |
| 6.1.1.11 | PS01039 | PS50862 |         |  |  |  |  |
| 6.1.1.12 | PS00527 | PS50862 |         |  |  |  |  |
| 6.1.1.14 | PS00284 | PS50862 |         |  |  |  |  |

|          |         |         |         |         |         |         |  |
|----------|---------|---------|---------|---------|---------|---------|--|
| 6.1.1.14 | PS00307 | PS00762 | PS50862 |         |         |         |  |
| 6.1.1.14 | PS00307 | PS50862 |         |         |         |         |  |
| 6.1.1.14 | PS50861 |         |         |         |         |         |  |
| 6.1.1.20 | PS00197 | PS50862 |         |         |         |         |  |
| 6.1.1.20 | PS00850 | PS50886 |         |         |         |         |  |
| 6.1.1.21 | PS00485 | PS50862 |         |         |         |         |  |
| 6.1.1.3  | PS00131 | PS50862 |         |         |         |         |  |
| 6.1.1.7  | PS00087 | PS50860 |         |         |         |         |  |
| 6.1.1.7  | PS00268 | PS50860 |         |         |         |         |  |
| 6.1.1.7  | PS00284 | PS50860 |         |         |         |         |  |
| 6.1.1.7  | PS00307 | PS50860 |         |         |         |         |  |
| 6.1.1.7  | PS50860 |         |         |         |         |         |  |
| 6.1.1.7  | PS50860 | PS50862 |         |         |         |         |  |
| 6.3.1.2  | PS00059 | PS00180 | PS00181 |         |         |         |  |
| 6.3.1.2  | PS00180 | PS00181 |         |         |         |         |  |
| 6.3.1.2  | PS00180 | PS00181 | PS00182 |         |         |         |  |
| 6.3.1.2  | PS00181 |         |         |         |         |         |  |
| 6.3.1.2  | PS00181 | PS00182 |         |         |         |         |  |
| 6.3.2.17 | PS00282 | PS01011 | PS01012 |         |         |         |  |
| 6.3.2.17 | PS01012 |         |         |         |         |         |  |
| 6.3.2.19 | PS00183 | PS50127 |         |         |         |         |  |
| 6.3.2.19 | PS50127 |         |         |         |         |         |  |
| 6.3.2.4  | PS00843 | PS00844 |         |         |         |         |  |
| 6.3.2.4  | PS00844 |         |         |         |         |         |  |
| 6.3.2.6  | PS01057 |         |         |         |         |         |  |
| 6.3.2.6  | PS01058 |         |         |         |         |         |  |
| 6.3.2.9  | PS01011 | PS01319 |         |         |         |         |  |
| 6.3.4.13 | PS00184 | PS00583 |         |         |         |         |  |
| 6.3.4.2  | PS00214 | PS00442 |         |         |         |         |  |
| 6.3.4.3  | PS00721 | PS00722 |         |         |         |         |  |
| 6.3.4.4  | PS00014 | PS00513 | PS01266 |         |         |         |  |
| 6.3.4.4  | PS00014 | PS01266 |         |         |         |         |  |
| 6.3.4.4  | PS00300 | PS01266 |         |         |         |         |  |
| 6.3.4.4  | PS00513 |         |         |         |         |         |  |
| 6.3.4.4  | PS00513 | PS01266 |         |         |         |         |  |
| 6.3.4.4  | PS01266 |         |         |         |         |         |  |
| 6.3.4.5  | PS00148 | PS00564 | PS00565 |         |         |         |  |
| 6.3.4.5  | PS00564 |         |         |         |         |         |  |
| 6.3.4.5  | PS00564 | PS00565 |         |         |         |         |  |
| 6.3.5.1  | PS00591 | PS50263 |         |         |         |         |  |
| 6.3.5.2  | PS00011 | PS00442 |         |         |         |         |  |
| 6.3.5.2  | PS00228 | PS00442 |         |         |         |         |  |
| 6.3.5.3  | PS00165 | PS00659 |         |         |         |         |  |
| 6.3.5.5  | PS00442 | PS00912 |         |         |         |         |  |
| 6.5.1.1  | PS00333 | PS00347 | PS00697 | PS50064 | PS50160 | PS50172 |  |
| 6.5.1.1  | PS00333 | PS00453 | PS00697 | PS50160 |         |         |  |
| 6.5.1.1  | PS00333 | PS00697 | PS50160 |         |         |         |  |
| 6.5.1.1  | PS00333 | PS50160 |         |         |         |         |  |
| 6.5.1.2  | PS01055 | PS01056 |         |         |         |         |  |
| 6.5.1.2  | PS01055 | PS01056 | PS50172 |         |         |         |  |

| 3 digit EC number | Pattern 1 | Pattern 2 | Pattern 3 | Pattern 4 | Pattern 5 | Pattern 6 | Pattern 7 |
|-------------------|-----------|-----------|-----------|-----------|-----------|-----------|-----------|
| 1.1.1             | PS00044   | PS00059   |           |           |           |           |           |
| 1.1.1             | PS00059   | PS00933   |           |           |           |           |           |
| 1.1.1             | PS00065   | PS00306   | PS00670   | PS00671   |           |           |           |
| 1.1.1             | PS00066   | PS00120   | PS00318   | PS50065   |           |           |           |
| 1.1.1             | PS00066   | PS00318   | PS00879   | PS01192   | PS50065   | PS50156   |           |
| 1.1.1             | PS00066   | PS00318   | PS01192   | PS50065   |           |           |           |
| 1.1.1             | PS00066   | PS00318   | PS01192   | PS50065   | PS50156   |           |           |
| 1.1.1             | PS00066   | PS00318   | PS50065   |           |           |           |           |
| 1.1.1             | PS00066   | PS00318   | PS50065   | PS50156   |           |           |           |
| 1.1.1             | PS00066   | PS50065   |           |           |           |           |           |
| 1.1.1             | PS00068   |           |           |           |           |           |           |
| 1.1.1             | PS00120   | PS00331   |           |           |           |           |           |
| 1.1.1             | PS00165   | PS01042   |           |           |           |           |           |
| 1.1.1             | PS00217   | PS00331   |           |           |           |           |           |
| 1.1.1             | PS00307   | PS00470   |           |           |           |           |           |
| 1.1.1             | PS00318   | PS01042   |           |           |           |           |           |
| 1.1.1             | PS00318   | PS01192   | PS50065   |           |           |           |           |
| 1.1.1             | PS00331   |           |           |           |           |           |           |
| 1.1.1             | PS00449   | PS00957   |           |           |           |           |           |
| 1.1.1             | PS00461   |           |           |           |           |           |           |
| 1.1.1             | PS00470   |           |           |           |           |           |           |
| 1.1.1             | PS00487   | PS00912   |           |           |           |           |           |
| 1.1.1             | PS00611   | PS01095   |           |           |           |           |           |
| 1.1.1             | PS00957   |           |           |           |           |           |           |
| 1.1.1             | PS01042   |           |           |           |           |           |           |
| 1.1.1             | PS50065   |           |           |           |           |           |           |
| 1.1.2             | PS00191   | PS00557   | PS50255   |           |           |           |           |
| 1.1.3             | PS00044   | PS00557   |           |           |           |           |           |
| 1.1.99            | PS00363   | PS00364   |           |           |           |           |           |
| 1.1.99            | PS00364   |           |           |           |           |           |           |
| 1.1.99            | PS00977   |           |           |           |           |           |           |
| 1.1.99            | PS00977   | PS00978   |           |           |           |           |           |
| 1.10.3            | PS00210   | PS00497   | PS00498   |           |           |           |           |
| 1.11.1            | PS00014   | PS00460   | PS00763   |           |           |           |           |
| 1.11.1            | PS00047   | PS00437   | PS00438   |           |           |           |           |
| 1.11.1            | PS00437   |           |           |           |           |           |           |
| 1.11.1            | PS00437   | PS00438   |           |           |           |           |           |
| 1.11.1            | PS00437   | PS00438   | PS01034   |           |           |           |           |
| 1.11.1            | PS00438   |           |           |           |           |           |           |
| 1.11.1            | PS50873   |           |           |           |           |           |           |
| 1.13.11           | PS00081   | PS00659   | PS00711   | PS50095   |           |           |           |
| 1.13.11           | PS00081   | PS50095   |           |           |           |           |           |
| 1.13.11           | PS00082   |           |           |           |           |           |           |
| 1.13.11           | PS00083   |           |           |           |           |           |           |
| 1.13.11           | PS00711   | PS50095   |           |           |           |           |           |
| 1.13.11           | PS00876   | PS00877   |           |           |           |           |           |
| 1.14.11           | PS01325   |           |           |           |           |           |           |
| 1.14.13           | PS50902   | PS60001   |           |           |           |           |           |
| 1.14.16           | PS00367   |           |           |           |           |           |           |
| 1.14.17           | PS00084   |           |           |           |           |           |           |
| 1.14.17           | PS00084   | PS00085   |           |           |           |           |           |

|         |         |         |         |         |  |  |  |
|---------|---------|---------|---------|---------|--|--|--|
| 1.14.17 | PS00084 | PS00085 | PS50320 |         |  |  |  |
| 1.14.19 | PS00191 | PS00476 | PS50255 |         |  |  |  |
| 1.14.19 | PS00476 |         |         |         |  |  |  |
| 1.14.19 | PS00574 |         |         |         |  |  |  |
| 1.14.99 | PS00593 |         |         |         |  |  |  |
| 1.15.1  | PS00087 | PS00332 |         |         |  |  |  |
| 1.15.1  | PS00088 |         |         |         |  |  |  |
| 1.17.4  | PS00089 | PS00185 |         |         |  |  |  |
| 1.17.4  | PS00089 | PS00583 |         |         |  |  |  |
| 1.17.4  | PS00368 |         |         |         |  |  |  |
| 1.17.4  | PS00368 | PS50817 | PS50818 | PS50819 |  |  |  |
| 1.18.6  | PS00065 | PS00692 | PS00746 |         |  |  |  |
| 1.2.1   | PS00071 | PS00422 |         |         |  |  |  |
| 1.2.1   | PS00071 | PS00584 |         |         |  |  |  |
| 1.2.1   | PS01223 |         |         |         |  |  |  |
| 1.3.1   | PS01017 | PS01018 | PS50319 |         |  |  |  |
| 1.3.1   | PS01298 |         |         |         |  |  |  |
| 1.3.3   | PS00911 |         |         |         |  |  |  |
| 1.3.3   | PS00911 | PS00912 |         |         |  |  |  |
| 1.3.3   | PS01021 |         |         |         |  |  |  |
| 1.3.99  | PS00044 | PS00073 |         |         |  |  |  |
| 1.3.99  | PS00072 | PS00073 |         |         |  |  |  |
| 1.4.1   | PS00074 |         |         |         |  |  |  |
| 1.4.3   | PS00191 | PS01164 |         |         |  |  |  |
| 1.4.3   | PS00445 | PS00677 |         |         |  |  |  |
| 1.4.3   | PS00579 | PS01064 |         |         |  |  |  |
| 1.4.3   | PS00677 |         |         |         |  |  |  |
| 1.4.3   | PS00926 |         |         |         |  |  |  |
| 1.4.3   | PS00926 | PS50328 |         |         |  |  |  |
| 1.4.3   | PS01064 |         |         |         |  |  |  |
| 1.4.3   | PS01164 |         |         |         |  |  |  |
| 1.4.3   | PS01164 | PS01165 |         |         |  |  |  |
| 1.5.1   | PS00075 |         |         |         |  |  |  |
| 1.5.1   | PS00075 | PS00152 |         |         |  |  |  |
| 1.5.1   | PS00443 | PS00521 |         |         |  |  |  |
| 1.6.5   | PS00284 | PS50314 |         |         |  |  |  |
| 1.6.5   | PS00443 | PS00583 |         |         |  |  |  |
| 1.6.5   | PS00667 | PS00668 | PS50314 |         |  |  |  |
| 1.6.5   | PS00667 | PS00668 | PS50320 |         |  |  |  |
| 1.6.5   | PS00668 | PS50314 |         |         |  |  |  |
| 1.6.5   | PS50314 | PS50320 |         |         |  |  |  |
| 1.6.5   | PS50319 | PS50320 |         |         |  |  |  |
| 1.6.99  | PS00198 | PS00551 | PS00642 | PS00643 |  |  |  |
| 1.6.99  | PS00503 | PS00535 |         |         |  |  |  |
| 1.6.99  | PS00535 | PS00542 |         |         |  |  |  |
| 1.6.99  | PS00644 | PS00645 | PS01039 |         |  |  |  |
| 1.7.3   | PS00366 |         |         |         |  |  |  |
| 1.9.3   | PS00077 | PS00078 |         |         |  |  |  |
| 1.9.3   | PS00077 | PS00267 |         |         |  |  |  |
| 1.9.3   | PS00077 | PS00659 |         |         |  |  |  |
| 1.9.3   | PS00077 | PS50253 |         |         |  |  |  |
| 1.9.3   | PS00078 | PS00527 |         |         |  |  |  |

|        |         |         |         |         |         |         |         |
|--------|---------|---------|---------|---------|---------|---------|---------|
| 1.9.3  | PS00078 | PS50320 |         |         |         |         |         |
| 1.9.3  | PS00848 |         |         |         |         |         |         |
| 1.9.3  | PS01329 |         |         |         |         |         |         |
| 1.97.1 | PS01087 |         |         |         |         |         |         |
| 2.1.1  | PS00014 | PS01279 |         |         |         |         |         |
| 2.1.1  | PS00041 | PS00374 | PS01124 |         |         |         |         |
| 2.1.1  | PS00050 | PS00094 |         |         |         |         |         |
| 2.1.1  | PS00094 | PS00095 |         |         |         |         |         |
| 2.1.1  | PS00200 | PS50280 | PS50867 | PS50868 |         |         |         |
| 2.1.1  | PS00354 | PS01359 | PS50016 | PS50089 | PS50216 | PS50280 | PS50868 |
| 2.1.1  | PS00445 | PS01279 |         |         |         |         |         |
| 2.1.1  | PS00598 | PS50013 | PS50280 | PS50867 | PS50868 |         |         |
| 2.1.1  | PS00732 | PS00839 | PS00840 |         |         |         |         |
| 2.1.1  | PS00839 |         |         |         |         |         |         |
| 2.1.1  | PS00840 |         |         |         |         |         |         |
| 2.1.1  | PS01100 |         |         |         |         |         |         |
| 2.1.1  | PS01131 |         |         |         |         |         |         |
| 2.1.1  | PS01230 |         |         |         |         |         |         |
| 2.1.1  | PS01230 | PS01231 |         |         |         |         |         |
| 2.1.1  | PS01279 |         |         |         |         |         |         |
| 2.1.1  | PS50123 |         |         |         |         |         |         |
| 2.1.1  | PS50280 | PS50867 |         |         |         |         |         |
| 2.1.1  | PS50280 | PS50867 | PS50868 |         |         |         |         |
| 2.1.2  | PS00096 |         |         |         |         |         |         |
| 2.2.1  | PS00044 | PS00187 |         |         |         |         |         |
| 2.2.1  | PS00187 | PS00659 |         |         |         |         |         |
| 2.2.1  | PS00187 | PS00801 |         |         |         |         |         |
| 2.2.1  | PS00187 | PS00801 | PS00802 |         |         |         |         |
| 2.2.1  | PS00226 | PS00802 |         |         |         |         |         |
| 2.2.1  | PS00801 |         |         |         |         |         |         |
| 2.2.1  | PS00801 | PS00802 |         |         |         |         |         |
| 2.2.1  | PS00802 |         |         |         |         |         |         |
| 2.3.1  | PS00098 | PS00099 | PS00737 |         |         |         |         |
| 2.3.1  | PS00098 | PS00606 |         |         |         |         |         |
| 2.3.1  | PS00100 |         |         |         |         |         |         |
| 2.3.1  | PS00439 | PS00440 |         |         |         |         |         |
| 2.3.1  | PS00440 |         |         |         |         |         |         |
| 2.3.1  | PS00441 |         |         |         |         |         |         |
| 2.3.1  | PS00591 | PS00975 | PS00976 |         |         |         |         |
| 2.3.1  | PS00633 | PS01357 | PS50014 | PS50134 | PS50135 |         |         |
| 2.3.1  | PS00975 | PS00976 |         |         |         |         |         |
| 2.3.2  | PS00462 |         |         |         |         |         |         |
| 2.3.3  | PS00399 | PS01216 | PS01217 |         |         |         |         |
| 2.3.3  | PS00480 |         |         |         |         |         |         |
| 2.3.3  | PS00510 |         |         |         |         |         |         |
| 2.3.3  | PS00815 |         |         |         |         |         |         |
| 2.3.3  | PS00815 | PS00816 |         |         |         |         |         |
| 2.3.3  | PS00816 |         |         |         |         |         |         |
| 2.3.3  | PS01226 |         |         |         |         |         |         |
| 2.4.1  | PS00011 | PS00375 |         |         |         |         |         |
| 2.4.1  | PS00102 |         |         |         |         |         |         |
| 2.4.1  | PS00335 |         |         |         |         |         |         |

|       |         |         |         |         |         |         |  |
|-------|---------|---------|---------|---------|---------|---------|--|
| 2.4.1 | PS00375 |         |         |         |         |         |  |
| 2.4.2 | PS00103 | PS00443 |         |         |         |         |  |
| 2.4.2 | PS00103 | PS50326 |         |         |         |         |  |
| 2.4.2 | PS00647 |         |         |         |         |         |  |
| 2.4.2 | PS01232 |         |         |         |         |         |  |
| 2.4.2 | PS01240 |         |         |         |         |         |  |
| 2.4.2 | PS01291 |         |         |         |         |         |  |
| 2.4.2 | PS01316 |         |         |         |         |         |  |
| 2.5.1 | PS00104 | PS00885 | PS01118 |         |         |         |  |
| 2.5.1 | PS00165 | PS00901 |         |         |         |         |  |
| 2.5.1 | PS00217 | PS00901 |         |         |         |         |  |
| 2.5.1 | PS00228 | PS01330 |         |         |         |         |  |
| 2.5.1 | PS00376 |         |         |         |         |         |  |
| 2.5.1 | PS00376 | PS00377 |         |         |         |         |  |
| 2.5.1 | PS00377 |         |         |         |         |         |  |
| 2.5.1 | PS00444 | PS00723 |         |         |         |         |  |
| 2.5.1 | PS00792 |         |         |         |         |         |  |
| 2.5.1 | PS00792 | PS00793 |         |         |         |         |  |
| 2.5.1 | PS00793 |         |         |         |         |         |  |
| 2.5.1 | PS00885 |         |         |         |         |         |  |
| 2.5.1 | PS00962 | PS01066 |         |         |         |         |  |
| 2.5.1 | PS01044 | PS01045 |         |         |         |         |  |
| 2.5.1 | PS01066 |         |         |         |         |         |  |
| 2.5.1 | PS50844 |         |         |         |         |         |  |
| 2.6.1 | PS00105 | PS00217 |         |         |         |         |  |
| 2.6.1 | PS00105 | PS01319 |         |         |         |         |  |
| 2.6.1 | PS00196 | PS00600 |         |         |         |         |  |
| 2.6.1 | PS00443 | PS01039 |         |         |         |         |  |
| 2.6.1 | PS00443 | PS50817 | PS50818 | PS50819 |         |         |  |
| 2.6.1 | PS00600 | PS01067 |         |         |         |         |  |
| 2.7.1 | PS00014 | PS00433 |         |         |         |         |  |
| 2.7.1 | PS00021 | PS00109 | PS00239 | PS50011 | PS50038 | PS50070 |  |
| 2.7.1 | PS00021 | PS00109 | PS50011 | PS50038 | PS50070 |         |  |
| 2.7.1 | PS00041 | PS00915 | PS00916 | PS50290 |         |         |  |
| 2.7.1 | PS00044 | PS00627 |         |         |         |         |  |
| 2.7.1 | PS00044 | PS01035 |         |         |         |         |  |
| 2.7.1 | PS00059 | PS00106 | PS00627 |         |         |         |  |
| 2.7.1 | PS00092 | PS00108 | PS50011 |         |         |         |  |
| 2.7.1 | PS00106 | PS00627 |         |         |         |         |  |
| 2.7.1 | PS00108 | PS00152 | PS01351 | PS50011 |         |         |  |
| 2.7.1 | PS00108 | PS00191 | PS50011 |         |         |         |  |
| 2.7.1 | PS00108 | PS00284 | PS50011 |         |         |         |  |
| 2.7.1 | PS00108 | PS00381 | PS50011 | PS50125 |         |         |  |
| 2.7.1 | PS00108 | PS00479 | PS50011 | PS50081 |         |         |  |
| 2.7.1 | PS00108 | PS00479 | PS50011 | PS50081 | PS50898 |         |  |
| 2.7.1 | PS00108 | PS00501 | PS50011 |         |         |         |  |
| 2.7.1 | PS00108 | PS01351 | PS50011 |         |         |         |  |
| 2.7.1 | PS00108 | PS50003 | PS50011 | PS50132 |         |         |  |
| 2.7.1 | PS00108 | PS50006 | PS50011 |         |         |         |  |
| 2.7.1 | PS00108 | PS50011 |         |         |         |         |  |
| 2.7.1 | PS00108 | PS50011 | PS50012 |         |         |         |  |
| 2.7.1 | PS00108 | PS50011 | PS50017 |         |         |         |  |

|       |         |         |         |         |         |  |  |
|-------|---------|---------|---------|---------|---------|--|--|
| 2.7.1 | PS00108 | PS50011 | PS50078 |         |         |  |  |
| 2.7.1 | PS00108 | PS50011 | PS50105 |         |         |  |  |
| 2.7.1 | PS00108 | PS50011 | PS50108 |         |         |  |  |
| 2.7.1 | PS00108 | PS50011 | PS50132 |         |         |  |  |
| 2.7.1 | PS00108 | PS50011 | PS50195 |         |         |  |  |
| 2.7.1 | PS00108 | PS50011 | PS50209 |         |         |  |  |
| 2.7.1 | PS00109 | PS00214 | PS00239 | PS50011 |         |  |  |
| 2.7.1 | PS00109 | PS00239 | PS00317 | PS50011 |         |  |  |
| 2.7.1 | PS00109 | PS00239 | PS00453 | PS50011 |         |  |  |
| 2.7.1 | PS00109 | PS00239 | PS01118 | PS50011 |         |  |  |
| 2.7.1 | PS00109 | PS00239 | PS50011 |         |         |  |  |
| 2.7.1 | PS00109 | PS00240 | PS50011 |         |         |  |  |
| 2.7.1 | PS00109 | PS00406 | PS01132 | PS50001 | PS50011 |  |  |
| 2.7.1 | PS00109 | PS00501 | PS50011 | PS50108 |         |  |  |
| 2.7.1 | PS00109 | PS00790 | PS00791 | PS50011 | PS50105 |  |  |
| 2.7.1 | PS00109 | PS50001 | PS50011 |         |         |  |  |
| 2.7.1 | PS00109 | PS50001 | PS50011 | PS50057 |         |  |  |
| 2.7.1 | PS00109 | PS50001 | PS50011 | PS50133 |         |  |  |
| 2.7.1 | PS00109 | PS50011 | PS50057 |         |         |  |  |
| 2.7.1 | PS00109 | PS50011 | PS50105 |         |         |  |  |
| 2.7.1 | PS00109 | PS50011 | PS50268 |         |         |  |  |
| 2.7.1 | PS00193 | PS50011 |         |         |         |  |  |
| 2.7.1 | PS00287 | PS01035 |         |         |         |  |  |
| 2.7.1 | PS00369 | PS00372 |         |         |         |  |  |
| 2.7.1 | PS00371 | PS01035 |         |         |         |  |  |
| 2.7.1 | PS00372 | PS00387 |         |         |         |  |  |
| 2.7.1 | PS00378 |         |         |         |         |  |  |
| 2.7.1 | PS00433 |         |         |         |         |  |  |
| 2.7.1 | PS00445 | PS00761 | PS00933 |         |         |  |  |
| 2.7.1 | PS00445 | PS00933 |         |         |         |  |  |
| 2.7.1 | PS00445 | PS00933 | PS00962 |         |         |  |  |
| 2.7.1 | PS00464 | PS00583 | PS00584 |         |         |  |  |
| 2.7.1 | PS00479 | PS50081 | PS50200 |         |         |  |  |
| 2.7.1 | PS00567 |         |         |         |         |  |  |
| 2.7.1 | PS00583 | PS00584 |         |         |         |  |  |
| 2.7.1 | PS00603 |         |         |         |         |  |  |
| 2.7.1 | PS00915 | PS00916 | PS50195 | PS50290 |         |  |  |
| 2.7.1 | PS00915 | PS00916 | PS50290 |         |         |  |  |
| 2.7.1 | PS00915 | PS50077 | PS50290 |         |         |  |  |
| 2.7.1 | PS00915 | PS50290 |         |         |         |  |  |
| 2.7.1 | PS01035 |         |         |         |         |  |  |
| 2.7.1 | PS01069 |         |         |         |         |  |  |
| 2.7.1 | PS01351 | PS50011 |         |         |         |  |  |
| 2.7.1 | PS50011 | PS50304 |         |         |         |  |  |
| 2.7.2 | PS00104 | PS01075 | PS01076 |         |         |  |  |
| 2.7.2 | PS00111 |         |         |         |         |  |  |
| 2.7.2 | PS00111 | PS00453 |         |         |         |  |  |
| 2.7.2 | PS00153 | PS00902 |         |         |         |  |  |
| 2.7.2 | PS00324 |         |         |         |         |  |  |
| 2.7.2 | PS00327 | PS00902 |         |         |         |  |  |
| 2.7.2 | PS00445 | PS01075 | PS01076 |         |         |  |  |
| 2.7.2 | PS00659 | PS00902 |         |         |         |  |  |



|       |         |         |         |         |         |  |  |
|-------|---------|---------|---------|---------|---------|--|--|
| 2.7.2 | PS00758 | PS01075 | PS01076 |         |         |  |  |
| 2.7.2 | PS00902 |         |         |         |         |  |  |
| 2.7.2 | PS00902 | PS50890 |         |         |         |  |  |
| 2.7.2 | PS01075 |         |         |         |         |  |  |
| 2.7.2 | PS01075 | PS01076 |         |         |         |  |  |
| 2.7.2 | PS01076 |         |         |         |         |  |  |
| 2.7.3 | PS00112 |         |         |         |         |  |  |
| 2.7.3 | PS00369 | PS00370 | PS00742 |         |         |  |  |
| 2.7.4 | PS00113 |         |         |         |         |  |  |
| 2.7.4 | PS00113 | PS00202 |         |         |         |  |  |
| 2.7.4 | PS00113 | PS50052 |         |         |         |  |  |
| 2.7.4 | PS01331 |         |         |         |         |  |  |
| 2.7.6 | PS00103 | PS00114 |         |         |         |  |  |
| 2.7.6 | PS00103 | PS00114 | PS00144 |         |         |  |  |
| 2.7.6 | PS00114 |         |         |         |         |  |  |
| 2.7.7 | PS00011 | PS00466 |         |         |         |  |  |
| 2.7.7 | PS00044 | PS00116 |         |         |         |  |  |
| 2.7.7 | PS00115 |         |         |         |         |  |  |
| 2.7.7 | PS00116 | PS00119 |         |         |         |  |  |
| 2.7.7 | PS00116 | PS00214 |         |         |         |  |  |
| 2.7.7 | PS00116 | PS00214 | PS50817 | PS50818 | PS50819 |  |  |
| 2.7.7 | PS00116 | PS50077 | PS50817 | PS50818 | PS50819 |  |  |
| 2.7.7 | PS00116 | PS50817 | PS50818 | PS50819 |         |  |  |
| 2.7.7 | PS00117 |         |         |         |         |  |  |
| 2.7.7 | PS00120 | PS01166 |         |         |         |  |  |
| 2.7.7 | PS00152 | PS00228 |         |         |         |  |  |
| 2.7.7 | PS00163 | PS00466 | PS01030 |         |         |  |  |
| 2.7.7 | PS00192 | PS01166 |         |         |         |  |  |
| 2.7.7 | PS00283 | PS01166 |         |         |         |  |  |
| 2.7.7 | PS00307 | PS00447 |         |         |         |  |  |
| 2.7.7 | PS00307 | PS00447 | PS00449 |         |         |  |  |
| 2.7.7 | PS00327 | PS01166 |         |         |         |  |  |
| 2.7.7 | PS00446 |         |         |         |         |  |  |
| 2.7.7 | PS00447 | PS00659 |         |         |         |  |  |
| 2.7.7 | PS00466 | PS01030 |         |         |         |  |  |
| 2.7.7 | PS00485 | PS01295 |         |         |         |  |  |
| 2.7.7 | PS00489 | PS00900 |         |         |         |  |  |
| 2.7.7 | PS00522 |         |         |         |         |  |  |
| 2.7.7 | PS00808 |         |         |         |         |  |  |
| 2.7.7 | PS00808 | PS00809 |         |         |         |  |  |
| 2.7.7 | PS00808 | PS00809 | PS00810 |         |         |  |  |
| 2.7.7 | PS00808 | PS00810 |         |         |         |  |  |
| 2.7.7 | PS00809 |         |         |         |         |  |  |
| 2.7.7 | PS00809 | PS00810 |         |         |         |  |  |
| 2.7.7 | PS01030 |         |         |         |         |  |  |
| 2.7.7 | PS01110 |         |         |         |         |  |  |
| 2.7.7 | PS01111 |         |         |         |         |  |  |
| 2.7.7 | PS01112 |         |         |         |         |  |  |
| 2.7.7 | PS01154 |         |         |         |         |  |  |
| 2.7.7 | PS01163 |         |         |         |         |  |  |
| 2.7.7 | PS01166 |         |         |         |         |  |  |
| 2.7.7 | PS01190 |         |         |         |         |  |  |

|        |         |         |         |         |         |         |         |
|--------|---------|---------|---------|---------|---------|---------|---------|
| 2.7.7  | PS01277 |         |         |         |         |         |         |
| 2.7.7  | PS01315 |         |         |         |         |         |         |
| 2.7.8  | PS00287 | PS01347 | PS01348 |         |         |         |         |
| 2.7.8  | PS00379 |         |         |         |         |         |         |
| 2.7.8  | PS01347 | PS01348 |         |         |         |         |         |
| 2.7.8  | PS01348 |         |         |         |         |         |         |
| 2.8.1  | PS00380 | PS00683 | PS50206 |         |         |         |         |
| 2.8.1  | PS00683 | PS50206 |         |         |         |         |         |
| 2.8.3  | PS01273 |         |         |         |         |         |         |
| 2.8.3  | PS01273 | PS01274 |         |         |         |         |         |
| 2.8.3  | PS01274 |         |         |         |         |         |         |
| 3.1.1  | PS00014 | PS00122 | PS00941 |         |         |         |         |
| 3.1.1  | PS00120 | PS00122 | PS00941 |         |         |         |         |
| 3.1.1  | PS00120 | PS00155 |         |         |         |         |         |
| 3.1.1  | PS00120 | PS00155 | PS00931 |         |         |         |         |
| 3.1.1  | PS00120 | PS50095 |         |         |         |         |         |
| 3.1.1  | PS00155 |         |         |         |         |         |         |
| 3.1.1  | PS00155 | PS00931 |         |         |         |         |         |
| 3.1.1  | PS00217 | PS01195 | PS01196 |         |         |         |         |
| 3.1.1  | PS00217 | PS01196 |         |         |         |         |         |
| 3.1.1  | PS00503 | PS00800 |         |         |         |         |         |
| 3.1.1  | PS01173 | PS01174 |         |         |         |         |         |
| 3.1.1  | PS01195 |         |         |         |         |         |         |
| 3.1.1  | PS01195 | PS01196 |         |         |         |         |         |
| 3.1.1  | PS01196 |         |         |         |         |         |         |
| 3.1.1  | PS50110 | PS50122 |         |         |         |         |         |
| 3.1.1  | PS50122 |         |         |         |         |         |         |
| 3.1.2  | PS00152 | PS00972 | PS00973 | PS50235 |         |         |         |
| 3.1.2  | PS00228 | PS00972 | PS00973 | PS50235 |         |         |         |
| 3.1.2  | PS00299 | PS00972 | PS00973 | PS50053 | PS50235 |         |         |
| 3.1.2  | PS00304 | PS00972 | PS00973 | PS50206 | PS50235 |         |         |
| 3.1.2  | PS00572 | PS00972 | PS00973 | PS50206 | PS50235 |         |         |
| 3.1.2  | PS00972 | PS00973 | PS50030 | PS50235 |         |         |         |
| 3.1.2  | PS00972 | PS00973 | PS50144 | PS50235 |         |         |         |
| 3.1.2  | PS00972 | PS00973 | PS50206 | PS50235 |         |         |         |
| 3.1.2  | PS00972 | PS00973 | PS50235 |         |         |         |         |
| 3.1.2  | PS00972 | PS00973 | PS50235 | PS50330 |         |         |         |
| 3.1.2  | PS00972 | PS50235 |         |         |         |         |         |
| 3.1.2  | PS00973 | PS50235 |         |         |         |         |         |
| 3.1.2  | PS01328 |         |         |         |         |         |         |
| 3.1.21 | PS00918 |         |         |         |         |         |         |
| 3.1.21 | PS00918 | PS00919 |         |         |         |         |         |
| 3.1.21 | PS00919 |         |         |         |         |         |         |
| 3.1.22 | PS01321 |         |         |         |         |         |         |
| 3.1.26 | PS00517 | PS50142 |         |         |         |         |         |
| 3.1.27 | PS00530 |         |         |         |         |         |         |
| 3.1.27 | PS00530 | PS00531 |         |         |         |         |         |
| 3.1.3  | PS00124 |         |         |         |         |         |         |
| 3.1.3  | PS00124 | PS00165 |         |         |         |         |         |
| 3.1.3  | PS00125 | PS00732 |         |         |         |         |         |
| 3.1.3  | PS00383 | PS00660 | PS00661 | PS50055 | PS50056 | PS50057 |         |
| 3.1.3  | PS00383 | PS00660 | PS00661 | PS50055 | PS50056 | PS50057 | PS50106 |

|        |         |         |         |         |         |         |  |
|--------|---------|---------|---------|---------|---------|---------|--|
| 3.1.3  | PS00383 | PS00740 | PS50055 | PS50056 | PS50060 |         |  |
| 3.1.3  | PS00383 | PS50001 | PS50055 | PS50056 |         |         |  |
| 3.1.3  | PS00383 | PS50054 | PS50056 |         |         |         |  |
| 3.1.3  | PS00383 | PS50054 | PS50056 | PS50206 |         |         |  |
| 3.1.3  | PS00383 | PS50055 | PS50056 | PS50191 |         |         |  |
| 3.1.3  | PS00383 | PS50055 | PS50056 | PS50206 |         |         |  |
| 3.1.3  | PS00616 | PS00778 |         |         |         |         |  |
| 3.1.3  | PS01157 |         |         |         |         |         |  |
| 3.1.30 | PS01070 |         |         |         |         |         |  |
| 3.1.31 | PS01123 | PS01284 | PS50830 |         |         |         |  |
| 3.1.4  | PS00126 |         |         |         |         |         |  |
| 3.1.4  | PS00126 | PS50110 |         |         |         |         |  |
| 3.1.4  | PS00126 | PS50319 |         |         |         |         |  |
| 3.1.4  | PS00384 |         |         |         |         |         |  |
| 3.1.4  | PS00384 | PS50095 |         |         |         |         |  |
| 3.1.4  | PS00607 |         |         |         |         |         |  |
| 3.1.4  | PS50001 | PS50002 | PS50003 | PS50004 | PS50007 | PS50008 |  |
| 3.1.4  | PS50004 | PS50007 | PS50008 |         |         |         |  |
| 3.1.4  | PS50007 | PS50008 |         |         |         |         |  |
| 3.1.6  | PS00149 | PS00262 | PS00523 |         |         |         |  |
| 3.1.8  | PS01322 | PS01323 |         |         |         |         |  |
| 3.10.1 | PS00014 | PS00149 | PS00523 |         |         |         |  |
| 3.2.1  | PS00014 | PS00583 | PS01095 |         |         |         |  |
| 3.2.1  | PS00019 | PS00025 | PS00129 | PS00707 |         |         |  |
| 3.2.1  | PS00026 | PS00773 | PS00774 |         |         |         |  |
| 3.2.1  | PS00026 | PS01095 |         |         |         |         |  |
| 3.2.1  | PS00071 | PS00502 |         |         |         |         |  |
| 3.2.1  | PS00092 | PS00129 | PS00707 |         |         |         |  |
| 3.2.1  | PS00129 |         |         |         |         |         |  |
| 3.2.1  | PS00129 | PS00707 |         |         |         |         |  |
| 3.2.1  | PS00193 | PS00502 |         |         |         |         |  |
| 3.2.1  | PS00214 | PS00659 |         |         |         |         |  |
| 3.2.1  | PS00217 | PS01034 |         |         |         |         |  |
| 3.2.1  | PS00217 | PS01324 |         |         |         |         |  |
| 3.2.1  | PS00226 | PS00572 | PS00653 |         |         |         |  |
| 3.2.1  | PS00385 |         |         |         |         |         |  |
| 3.2.1  | PS00387 | PS00927 | PS00928 |         |         |         |  |
| 3.2.1  | PS00443 | PS00659 |         |         |         |         |  |
| 3.2.1  | PS00448 | PS00592 | PS00698 |         |         |         |  |
| 3.2.1  | PS00502 |         |         |         |         |         |  |
| 3.2.1  | PS00506 | PS00679 |         |         |         |         |  |
| 3.2.1  | PS00512 |         |         |         |         |         |  |
| 3.2.1  | PS00559 | PS00775 |         |         |         |         |  |
| 3.2.1  | PS00561 |         |         |         |         |         |  |
| 3.2.1  | PS00561 | PS00591 |         |         |         |         |  |
| 3.2.1  | PS00561 | PS00592 | PS00698 |         |         |         |  |
| 3.2.1  | PS00561 | PS00655 | PS00656 |         |         |         |  |
| 3.2.1  | PS00561 | PS00659 |         |         |         |         |  |
| 3.2.1  | PS00561 | PS01095 |         |         |         |         |  |
| 3.2.1  | PS00561 | PS01140 |         |         |         |         |  |
| 3.2.1  | PS00562 | PS00591 |         |         |         |         |  |
| 3.2.1  | PS00562 | PS00655 | PS00656 |         |         |         |  |

|        |         |         |         |         |  |  |  |
|--------|---------|---------|---------|---------|--|--|--|
| 3.2.1  | PS00562 | PS00659 |         |         |  |  |  |
| 3.2.1  | PS00562 | PS01140 |         |         |  |  |  |
| 3.2.1  | PS00562 | PS01140 | PS50842 |         |  |  |  |
| 3.2.1  | PS00572 | PS00653 |         |         |  |  |  |
| 3.2.1  | PS00583 | PS01095 |         |         |  |  |  |
| 3.2.1  | PS00587 |         |         |         |  |  |  |
| 3.2.1  | PS00591 | PS00659 | PS01072 |         |  |  |  |
| 3.2.1  | PS00591 | PS00776 | PS00777 | PS50327 |  |  |  |
| 3.2.1  | PS00592 |         |         |         |  |  |  |
| 3.2.1  | PS00592 | PS00698 |         |         |  |  |  |
| 3.2.1  | PS00608 | PS00719 |         |         |  |  |  |
| 3.2.1  | PS00609 |         |         |         |  |  |  |
| 3.2.1  | PS00655 | PS00656 |         |         |  |  |  |
| 3.2.1  | PS00656 |         |         |         |  |  |  |
| 3.2.1  | PS00698 |         |         |         |  |  |  |
| 3.2.1  | PS00719 |         |         |         |  |  |  |
| 3.2.1  | PS00773 | PS00774 |         |         |  |  |  |
| 3.2.1  | PS00775 |         |         |         |  |  |  |
| 3.2.1  | PS00775 | PS01044 |         |         |  |  |  |
| 3.2.1  | PS00776 | PS00777 |         |         |  |  |  |
| 3.2.1  | PS00776 | PS00777 | PS01034 |         |  |  |  |
| 3.2.1  | PS00777 | PS01095 |         |         |  |  |  |
| 3.2.1  | PS00812 |         |         |         |  |  |  |
| 3.2.1  | PS00820 |         |         |         |  |  |  |
| 3.2.1  | PS00927 |         |         |         |  |  |  |
| 3.2.1  | PS00927 | PS00928 |         |         |  |  |  |
| 3.2.1  | PS00953 |         |         |         |  |  |  |
| 3.2.1  | PS01027 |         |         |         |  |  |  |
| 3.2.1  | PS01140 |         |         |         |  |  |  |
| 3.2.1  | PS01182 |         |         |         |  |  |  |
| 3.2.1  | PS01324 |         |         |         |  |  |  |
| 3.2.1  | PS60000 |         |         |         |  |  |  |
| 3.2.2  | PS00275 |         |         |         |  |  |  |
| 3.2.2  | PS00516 |         |         |         |  |  |  |
| 3.2.2  | PS01242 |         |         |         |  |  |  |
| 3.2.2  | PS01247 |         |         |         |  |  |  |
| 3.3.1  | PS00738 | PS00739 |         |         |  |  |  |
| 3.3.1  | PS00739 |         |         |         |  |  |  |
| 3.4.11 | PS00277 | PS00631 |         |         |  |  |  |
| 3.4.11 | PS00392 | PS00758 | PS00759 |         |  |  |  |
| 3.4.11 | PS00631 |         |         |         |  |  |  |
| 3.4.11 | PS00680 |         |         |         |  |  |  |
| 3.4.11 | PS01202 |         |         |         |  |  |  |
| 3.4.13 | PS00869 |         |         |         |  |  |  |
| 3.4.16 | PS00131 | PS00560 |         |         |  |  |  |
| 3.4.19 | PS01333 |         |         |         |  |  |  |
| 3.4.19 | PS01333 | PS01334 |         |         |  |  |  |
| 3.4.19 | PS01334 |         |         |         |  |  |  |
| 3.4.21 | PS00011 | PS00021 | PS50070 |         |  |  |  |
| 3.4.21 | PS00021 | PS00338 | PS50070 |         |  |  |  |
| 3.4.21 | PS00137 | PS00138 | PS00307 |         |  |  |  |
| 3.4.21 | PS00137 | PS00138 | PS50847 |         |  |  |  |

|        |         |         |         |         |         |         |         |
|--------|---------|---------|---------|---------|---------|---------|---------|
| 3.4.21 | PS00138 | PS50093 |         |         |         |         |         |
| 3.4.21 | PS00381 | PS00382 |         |         |         |         |         |
| 3.4.21 | PS00495 |         |         |         |         |         |         |
| 3.4.21 | PS00672 | PS00673 |         |         |         |         |         |
| 3.4.21 | PS00740 | PS01180 | PS01209 | PS50024 | PS50060 | PS50068 | PS50287 |
| 3.4.21 | PS01046 |         |         |         |         |         |         |
| 3.4.22 | PS00455 | PS01121 | PS01122 | PS50207 | PS50208 | PS50209 |         |
| 3.4.22 | PS01121 | PS01122 | PS50207 | PS50208 | PS50209 |         |         |
| 3.4.23 | PS00855 |         |         |         |         |         |         |
| 3.4.24 | PS00023 | PS00024 | PS00546 |         |         |         |         |
| 3.4.24 | PS00546 |         |         |         |         |         |         |
| 3.4.24 | PS01016 |         |         |         |         |         |         |
| 3.4.25 | PS00388 |         |         |         |         |         |         |
| 3.4.25 | PS00388 | PS00854 |         |         |         |         |         |
| 3.4.25 | PS00761 | PS00854 |         |         |         |         |         |
| 3.4.25 | PS00854 |         |         |         |         |         |         |
| 3.5.1  | PS00024 | PS00145 | PS01120 |         |         |         |         |
| 3.5.1  | PS00144 | PS00445 | PS00917 |         |         |         |         |
| 3.5.1  | PS00145 |         |         |         |         |         |         |
| 3.5.1  | PS00145 | PS00403 | PS01120 |         |         |         |         |
| 3.5.1  | PS00145 | PS01120 |         |         |         |         |         |
| 3.5.1  | PS01120 |         |         |         |         |         |         |
| 3.5.2  | PS00336 |         |         |         |         |         |         |
| 3.5.2  | PS00337 |         |         |         |         |         |         |
| 3.5.2  | PS00482 | PS00483 |         |         |         |         |         |
| 3.5.2  | PS00482 | PS01137 |         |         |         |         |         |
| 3.5.2  | PS00483 |         |         |         |         |         |         |
| 3.5.2  | PS00743 | PS00744 |         |         |         |         |         |
| 3.5.3  | PS00147 | PS00148 |         |         |         |         |         |
| 3.5.3  | PS00147 | PS00148 | PS01053 |         |         |         |         |
| 3.5.3  | PS00148 | PS01053 |         |         |         |         |         |
| 3.5.4  | PS00859 |         |         |         |         |         |         |
| 3.5.4  | PS00859 | PS00860 |         |         |         |         |         |
| 3.5.99 | PS01161 |         |         |         |         |         |         |
| 3.6.1  | PS00150 | PS00151 |         |         |         |         |         |
| 3.6.1  | PS00287 | PS00893 |         |         |         |         |         |
| 3.6.1  | PS01238 |         |         |         |         |         |         |
| 3.6.3  | PS00044 | PS00449 |         |         |         |         |         |
| 3.6.3  | PS00095 | PS00152 |         |         |         |         |         |
| 3.6.3  | PS00152 | PS50817 | PS50818 |         |         |         |         |
| 3.6.3  | PS00152 | PS50817 | PS50818 | PS50819 |         |         |         |
| 3.6.3  | PS00152 | PS50817 | PS50819 |         |         |         |         |
| 3.6.3  | PS00154 | PS00214 |         |         |         |         |         |
| 3.6.3  | PS00154 | PS00228 |         |         |         |         |         |
| 3.6.3  | PS00154 | PS00338 |         |         |         |         |         |
| 3.6.3  | PS00154 | PS00591 | PS01229 |         |         |         |         |
| 3.6.3  | PS00154 | PS00606 | PS50846 |         |         |         |         |
| 3.6.3  | PS00154 | PS00962 |         |         |         |         |         |
| 3.6.3  | PS00154 | PS01047 | PS50846 |         |         |         |         |
| 3.6.3  | PS00154 | PS01229 |         |         |         |         |         |
| 3.6.3  | PS00154 | PS01229 | PS50846 |         |         |         |         |
| 3.6.3  | PS00154 | PS50320 |         |         |         |         |         |

|        |         |         |         |         |  |  |  |
|--------|---------|---------|---------|---------|--|--|--|
| 3.6.3  | PS00449 | PS50319 |         |         |  |  |  |
| 3.6.3  | PS00449 | PS50320 |         |         |  |  |  |
| 3.6.3  | PS00605 |         |         |         |  |  |  |
| 3.8.1  | PS01205 |         |         |         |  |  |  |
| 4.1.1  | PS00066 | PS00906 | PS00907 |         |  |  |  |
| 4.1.1  | PS00119 | PS00392 |         |         |  |  |  |
| 4.1.1  | PS00156 |         |         |         |  |  |  |
| 4.1.1  | PS00196 | PS00703 |         |         |  |  |  |
| 4.1.1  | PS00392 | PS01039 |         |         |  |  |  |
| 4.1.1  | PS00393 |         |         |         |  |  |  |
| 4.1.1  | PS00393 | PS00781 |         |         |  |  |  |
| 4.1.1  | PS00505 |         |         |         |  |  |  |
| 4.1.1  | PS00532 |         |         |         |  |  |  |
| 4.1.1  | PS00591 | PS01336 |         |         |  |  |  |
| 4.1.1  | PS00703 |         |         |         |  |  |  |
| 4.1.1  | PS00878 | PS00879 |         |         |  |  |  |
| 4.1.1  | PS00906 |         |         |         |  |  |  |
| 4.1.1  | PS00906 | PS00907 |         |         |  |  |  |
| 4.1.1  | PS00906 | PS00907 | PS01039 |         |  |  |  |
| 4.1.1  | PS00907 |         |         |         |  |  |  |
| 4.1.1  | PS01336 |         |         |         |  |  |  |
| 4.1.2  | PS00152 | PS00602 | PS00806 |         |  |  |  |
| 4.1.2  | PS00158 |         |         |         |  |  |  |
| 4.1.2  | PS00159 | PS00160 | PS00165 |         |  |  |  |
| 4.1.2  | PS00602 |         |         |         |  |  |  |
| 4.1.2  | PS00602 | PS00806 |         |         |  |  |  |
| 4.1.2  | PS00806 |         |         |         |  |  |  |
| 4.1.2  | PS60002 | PS60003 |         |         |  |  |  |
| 4.1.3  | PS00217 | PS00228 | PS00665 | PS00666 |  |  |  |
| 4.1.3  | PS00217 | PS00665 | PS00666 |         |  |  |  |
| 4.1.3  | PS00442 | PS00690 |         |         |  |  |  |
| 4.1.3  | PS01062 |         |         |         |  |  |  |
| 4.1.99 | PS00104 | PS00394 | PS00691 |         |  |  |  |
| 4.1.99 | PS00230 | PS00394 | PS00691 |         |  |  |  |
| 4.1.99 | PS00853 |         |         |         |  |  |  |
| 4.1.99 | PS01083 | PS01084 |         |         |  |  |  |
| 4.2.1  | PS00041 | PS00665 | PS00666 |         |  |  |  |
| 4.2.1  | PS00099 | PS00450 | PS01244 |         |  |  |  |
| 4.2.1  | PS00104 | PS01129 | PS50889 |         |  |  |  |
| 4.2.1  | PS00167 |         |         |         |  |  |  |
| 4.2.1  | PS00167 | PS00168 |         |         |  |  |  |
| 4.2.1  | PS00167 | PS00201 |         |         |  |  |  |
| 4.2.1  | PS00167 | PS50007 |         |         |  |  |  |
| 4.2.1  | PS00168 |         |         |         |  |  |  |
| 4.2.1  | PS00169 |         |         |         |  |  |  |
| 4.2.1  | PS00583 | PS00665 | PS00666 |         |  |  |  |
| 4.2.1  | PS00704 | PS00705 |         |         |  |  |  |
| 4.2.1  | PS00705 |         |         |         |  |  |  |
| 4.2.1  | PS00886 |         |         |         |  |  |  |
| 4.2.1  | PS00886 | PS00887 |         |         |  |  |  |
| 4.2.1  | PS00954 |         |         |         |  |  |  |
| 4.2.1  | PS00955 |         |         |         |  |  |  |

|        |         |         |         |         |  |  |  |
|--------|---------|---------|---------|---------|--|--|--|
| 4.2.1  | PS01028 |         |         |         |  |  |  |
| 4.2.1  | PS01029 |         |         |         |  |  |  |
| 4.2.1  | PS01129 |         |         |         |  |  |  |
| 4.2.1  | PS01149 |         |         |         |  |  |  |
| 4.2.1  | PS01233 |         |         |         |  |  |  |
| 4.2.1  | PS01268 |         |         |         |  |  |  |
| 4.2.3  | PS00217 | PS00787 | PS00788 | PS00789 |  |  |  |
| 4.2.3  | PS00787 | PS00788 |         |         |  |  |  |
| 4.2.3  | PS00787 | PS00788 | PS00789 |         |  |  |  |
| 4.2.3  | PS00787 | PS00789 |         |         |  |  |  |
| 4.2.3  | PS00788 | PS00789 |         |         |  |  |  |
| 4.2.3  | PS00987 |         |         |         |  |  |  |
| 4.2.3  | PS00987 | PS00988 |         |         |  |  |  |
| 4.2.3  | PS01335 |         |         |         |  |  |  |
| 4.2.99 | PS00726 | PS00727 | PS00728 | PS50800 |  |  |  |
| 4.3.1  | PS00043 | PS00165 |         |         |  |  |  |
| 4.3.1  | PS00217 | PS00488 |         |         |  |  |  |
| 4.3.1  | PS00488 |         |         |         |  |  |  |
| 4.3.1  | PS00533 |         |         |         |  |  |  |
| 4.3.2  | PS00163 | PS00284 |         |         |  |  |  |
| 4.3.2  | PS00163 | PS00636 |         |         |  |  |  |
| 4.4.1  | PS00087 | PS00868 |         |         |  |  |  |
| 4.4.1  | PS00821 | PS00822 |         |         |  |  |  |
| 4.4.1  | PS00822 |         |         |         |  |  |  |
| 4.4.1  | PS00934 | PS00935 |         |         |  |  |  |
| 4.6.1  | PS00137 | PS00452 | PS50125 |         |  |  |  |
| 4.6.1  | PS00177 | PS50125 |         |         |  |  |  |
| 4.6.1  | PS00287 | PS00452 | PS50125 |         |  |  |  |
| 4.6.1  | PS00452 | PS00458 | PS50011 | PS50125 |  |  |  |
| 4.6.1  | PS00452 | PS50011 | PS50125 |         |  |  |  |
| 4.6.1  | PS00452 | PS50125 |         |         |  |  |  |
| 4.6.1  | PS00452 | PS50125 | PS50839 |         |  |  |  |
| 4.6.1  | PS00659 | PS50125 | PS50200 |         |  |  |  |
| 4.6.1  | PS01092 | PS01093 |         |         |  |  |  |
| 4.6.1  | PS01103 | PS50125 | PS50200 |         |  |  |  |
| 4.6.1  | PS01350 |         |         |         |  |  |  |
| 4.6.1  | PS50110 | PS50125 |         |         |  |  |  |
| 4.99.1 | PS00534 |         |         |         |  |  |  |
| 5.1.1  | PS00395 |         |         |         |  |  |  |
| 5.1.1  | PS00923 | PS00924 |         |         |  |  |  |
| 5.1.1  | PS00924 |         |         |         |  |  |  |
| 5.1.1  | PS01326 |         |         |         |  |  |  |
| 5.1.3  | PS00545 |         |         |         |  |  |  |
| 5.1.3  | PS01085 |         |         |         |  |  |  |
| 5.1.3  | PS01085 | PS01086 |         |         |  |  |  |
| 5.2.1  | PS00014 | PS00170 | PS50072 |         |  |  |  |
| 5.2.1  | PS00014 | PS00453 | PS50059 |         |  |  |  |
| 5.2.1  | PS00014 | PS00454 | PS50059 |         |  |  |  |
| 5.2.1  | PS00014 | PS50059 |         |         |  |  |  |
| 5.2.1  | PS00170 | PS50072 |         |         |  |  |  |
| 5.2.1  | PS00453 | PS00454 | PS50059 |         |  |  |  |
| 5.2.1  | PS00453 | PS50059 |         |         |  |  |  |

|        |         |         |         |  |  |  |  |
|--------|---------|---------|---------|--|--|--|--|
| 5.2.1  | PS00454 | PS50059 |         |  |  |  |  |
| 5.2.1  | PS01096 | PS50198 |         |  |  |  |  |
| 5.2.1  | PS50072 |         |         |  |  |  |  |
| 5.2.1  | PS50198 |         |         |  |  |  |  |
| 5.3.1  | PS00171 |         |         |  |  |  |  |
| 5.3.1  | PS00171 | PS00389 |         |  |  |  |  |
| 5.3.1  | PS00172 | PS00173 |         |  |  |  |  |
| 5.3.1  | PS00174 |         |         |  |  |  |  |
| 5.3.1  | PS00174 | PS00230 |         |  |  |  |  |
| 5.3.1  | PS00174 | PS00765 |         |  |  |  |  |
| 5.3.1  | PS00174 | PS00765 | PS50097 |  |  |  |  |
| 5.3.1  | PS00765 |         |         |  |  |  |  |
| 5.3.1  | PS00965 | PS00966 |         |  |  |  |  |
| 5.3.1  | PS00966 |         |         |  |  |  |  |
| 5.4.3  | PS00228 | PS00600 |         |  |  |  |  |
| 5.4.99 | PS00043 | PS00544 |         |  |  |  |  |
| 5.4.99 | PS00196 | PS01074 |         |  |  |  |  |
| 5.4.99 | PS00268 | PS00544 |         |  |  |  |  |
| 5.4.99 | PS00544 |         |         |  |  |  |  |
| 5.4.99 | PS01074 |         |         |  |  |  |  |
| 5.99.1 | PS00043 | PS00396 |         |  |  |  |  |
| 5.99.1 | PS00087 | PS00177 |         |  |  |  |  |
| 5.99.1 | PS00154 | PS00177 |         |  |  |  |  |
| 5.99.1 | PS00177 | PS00217 |         |  |  |  |  |
| 5.99.1 | PS00177 | PS50817 | PS50818 |  |  |  |  |
| 5.99.1 | PS00396 |         |         |  |  |  |  |
| 6.1.1  | PS00087 | PS50860 |         |  |  |  |  |
| 6.1.1  | PS00131 | PS50862 |         |  |  |  |  |
| 6.1.1  | PS00197 | PS50862 |         |  |  |  |  |
| 6.1.1  | PS00268 | PS50860 |         |  |  |  |  |
| 6.1.1  | PS00284 | PS50860 |         |  |  |  |  |
| 6.1.1  | PS00284 | PS50862 |         |  |  |  |  |
| 6.1.1  | PS00307 | PS00762 | PS50862 |  |  |  |  |
| 6.1.1  | PS00307 | PS50860 |         |  |  |  |  |
| 6.1.1  | PS00307 | PS50862 |         |  |  |  |  |
| 6.1.1  | PS00485 | PS50862 |         |  |  |  |  |
| 6.1.1  | PS00527 | PS50862 |         |  |  |  |  |
| 6.1.1  | PS00595 | PS50862 |         |  |  |  |  |
| 6.1.1  | PS00762 |         |         |  |  |  |  |
| 6.1.1  | PS00762 | PS50862 |         |  |  |  |  |
| 6.1.1  | PS00850 | PS50886 |         |  |  |  |  |
| 6.1.1  | PS01039 | PS50862 |         |  |  |  |  |
| 6.1.1  | PS50860 |         |         |  |  |  |  |
| 6.1.1  | PS50860 | PS50862 |         |  |  |  |  |
| 6.1.1  | PS50861 |         |         |  |  |  |  |
| 6.3.1  | PS00059 | PS00180 | PS00181 |  |  |  |  |
| 6.3.1  | PS00180 | PS00181 |         |  |  |  |  |
| 6.3.1  | PS00180 | PS00181 | PS00182 |  |  |  |  |
| 6.3.1  | PS00181 |         |         |  |  |  |  |
| 6.3.1  | PS00181 | PS00182 |         |  |  |  |  |
| 6.3.2  | PS00183 | PS50127 |         |  |  |  |  |
| 6.3.2  | PS00282 | PS01011 | PS01012 |  |  |  |  |



|       |         |         |         |         |         |         |  |
|-------|---------|---------|---------|---------|---------|---------|--|
| 6.3.2 | PS00843 |         |         |         |         |         |  |
| 6.3.2 | PS00843 | PS00844 |         |         |         |         |  |
| 6.3.2 | PS00844 |         |         |         |         |         |  |
| 6.3.2 | PS01011 |         |         |         |         |         |  |
| 6.3.2 | PS01011 | PS01012 |         |         |         |         |  |
| 6.3.2 | PS01011 | PS01319 |         |         |         |         |  |
| 6.3.2 | PS01012 |         |         |         |         |         |  |
| 6.3.2 | PS01057 |         |         |         |         |         |  |
| 6.3.2 | PS01058 |         |         |         |         |         |  |
| 6.3.2 | PS50127 |         |         |         |         |         |  |
| 6.3.4 | PS00014 | PS00513 | PS01266 |         |         |         |  |
| 6.3.4 | PS00014 | PS01266 |         |         |         |         |  |
| 6.3.4 | PS00148 | PS00564 | PS00565 |         |         |         |  |
| 6.3.4 | PS00184 | PS00583 |         |         |         |         |  |
| 6.3.4 | PS00214 | PS00442 |         |         |         |         |  |
| 6.3.4 | PS00300 | PS01266 |         |         |         |         |  |
| 6.3.4 | PS00513 |         |         |         |         |         |  |
| 6.3.4 | PS00513 | PS01266 |         |         |         |         |  |
| 6.3.4 | PS00564 |         |         |         |         |         |  |
| 6.3.4 | PS00564 | PS00565 |         |         |         |         |  |
| 6.3.4 | PS00721 | PS00722 |         |         |         |         |  |
| 6.3.4 | PS01266 |         |         |         |         |         |  |
| 6.3.5 | PS00011 | PS00442 |         |         |         |         |  |
| 6.3.5 | PS00165 | PS00659 |         |         |         |         |  |
| 6.3.5 | PS00228 | PS00442 |         |         |         |         |  |
| 6.3.5 | PS00442 | PS00912 |         |         |         |         |  |
| 6.3.5 | PS00591 | PS50263 |         |         |         |         |  |
| 6.5.1 | PS00333 | PS00347 | PS00697 | PS50064 | PS50160 | PS50172 |  |
| 6.5.1 | PS00333 | PS00453 | PS00697 | PS50160 |         |         |  |
| 6.5.1 | PS00333 | PS00697 | PS50160 |         |         |         |  |
| 6.5.1 | PS00333 | PS50160 |         |         |         |         |  |
| 6.5.1 | PS01055 | PS01056 |         |         |         |         |  |
| 6.5.1 | PS01055 | PS01056 | PS50172 |         |         |         |  |
